# Supplementary material for: Harnessing halogen bond donors for enhanced nitrogen reduction: a case study on metal-free boron nitride single-atom catalysts
Source: Royal Society of Chemistry journal article supplement (doi:10.1039/d4cp00076e), 2024-01-01
Supplement: d4cp00076e1.pdf [file d4cp00076e1.pdf]

### Supplementary Information

## Harnessing Halogen Bond Donors for Enhanced Nitrogen Reduction: A Case Study on Metal-Free Boron Nitride Single Atom Catalysts

Venkata Surya Kumar Choutipalli<sup>\*,a,b</sup> and Venkatesan Subramanian<sup>\*,a,b,c</sup>

<sup>a</sup>Academy of Scientific and Innovative Research (AcSIR), Ghaziabad-201 002, India.

<sup>b</sup>Centre for High Computing, CSIR-Central Leather Research Institute, Adyar, Chennai-600 020, India.

<sup>c</sup>Department of Chemistry, Indian Institute of Technology Madras, Adyar, Chennai-600 020, India.

\*E-mail: subuchem@hotmail.com; subramanianv@iitm.ac.in; chvsk07@gmail.com

|          | Title                                                                                                                                                                                              | Page No. |
|----------|----------------------------------------------------------------------------------------------------------------------------------------------------------------------------------------------------|----------|
| Fig. S1  | Optimized geometries of heteroatom doped BN nanosheets and their interaction with N <sub>2</sub> molecule.                                                                                         | 2        |
| Fig. S2  | Nitrogen activation at boron nitride nanomaterials of various diameters.                                                                                                                           | 3        |
| Fig. S3  | Lewis acid-base pair formation on interaction of alkali metal ions with Si <sub>B</sub> BN.                                                                                                        | 4        |
| Fig. S4  | MO correlation diagram for neutral B-Lewis acids assisted nitrogen activation. Significant stabilization of LUMO of N <sub>2</sub> and HOMO of the activated N <sub>2</sub> species are witnessed. | 5        |
| Fig. S5  | Optimized geometries and FMO contours of Imidazolium based halogen bond donors (XB1-XB4) assisted N <sub>2</sub> -Si <sub>B</sub> BN system.                                                       | 6        |
| Fig. S6  | Optimized geometries and FMO contours of triazole based halogen bond donors (XB5-XB8) assisted N <sub>2</sub> -Si <sub>B</sub> BN system.                                                          | 7        |
| Fig. S7  | Optimized geometries and FMO contours of neutral Halogen bond donors (XB9 and XB10) assisted N <sub>2</sub> -Si <sub>B</sub> BN system                                                             | 8        |
| Table S1 | Cohesive and Defect Formation Energies of Defective BN Sheet.                                                                                                                                      | 8        |
| Table S2 | Population Analysis and Nitrogen Interaction Energies of Various Si Doped Defective BN Nanomaterials.                                                                                              | 9        |
| Table S3 | Geometric parameters, population analysis and overpotential details of Lewis acids assisted N <sub>2</sub> -Si <sub>B</sub> BN nanosheet.                                                          | 10       |
| Table S4 | Geometrical and population analysis results of halogen bond donors augmented N <sub>2</sub> -Si <sub>B</sub> BN system.                                                                            | 11       |
| Table S5 | Energetics of elementary steps involved in nitrogen reduction reaction before and after the augmentation of XB4                                                                                    | 12       |
| Table S6 | Cartesian coordinates of geometries of heteroatom doped BN sheet and their corresponding N <sub>2</sub> activated systems optimized at ωB97X-D/6-31G(d) level of theory.                           | 12       |

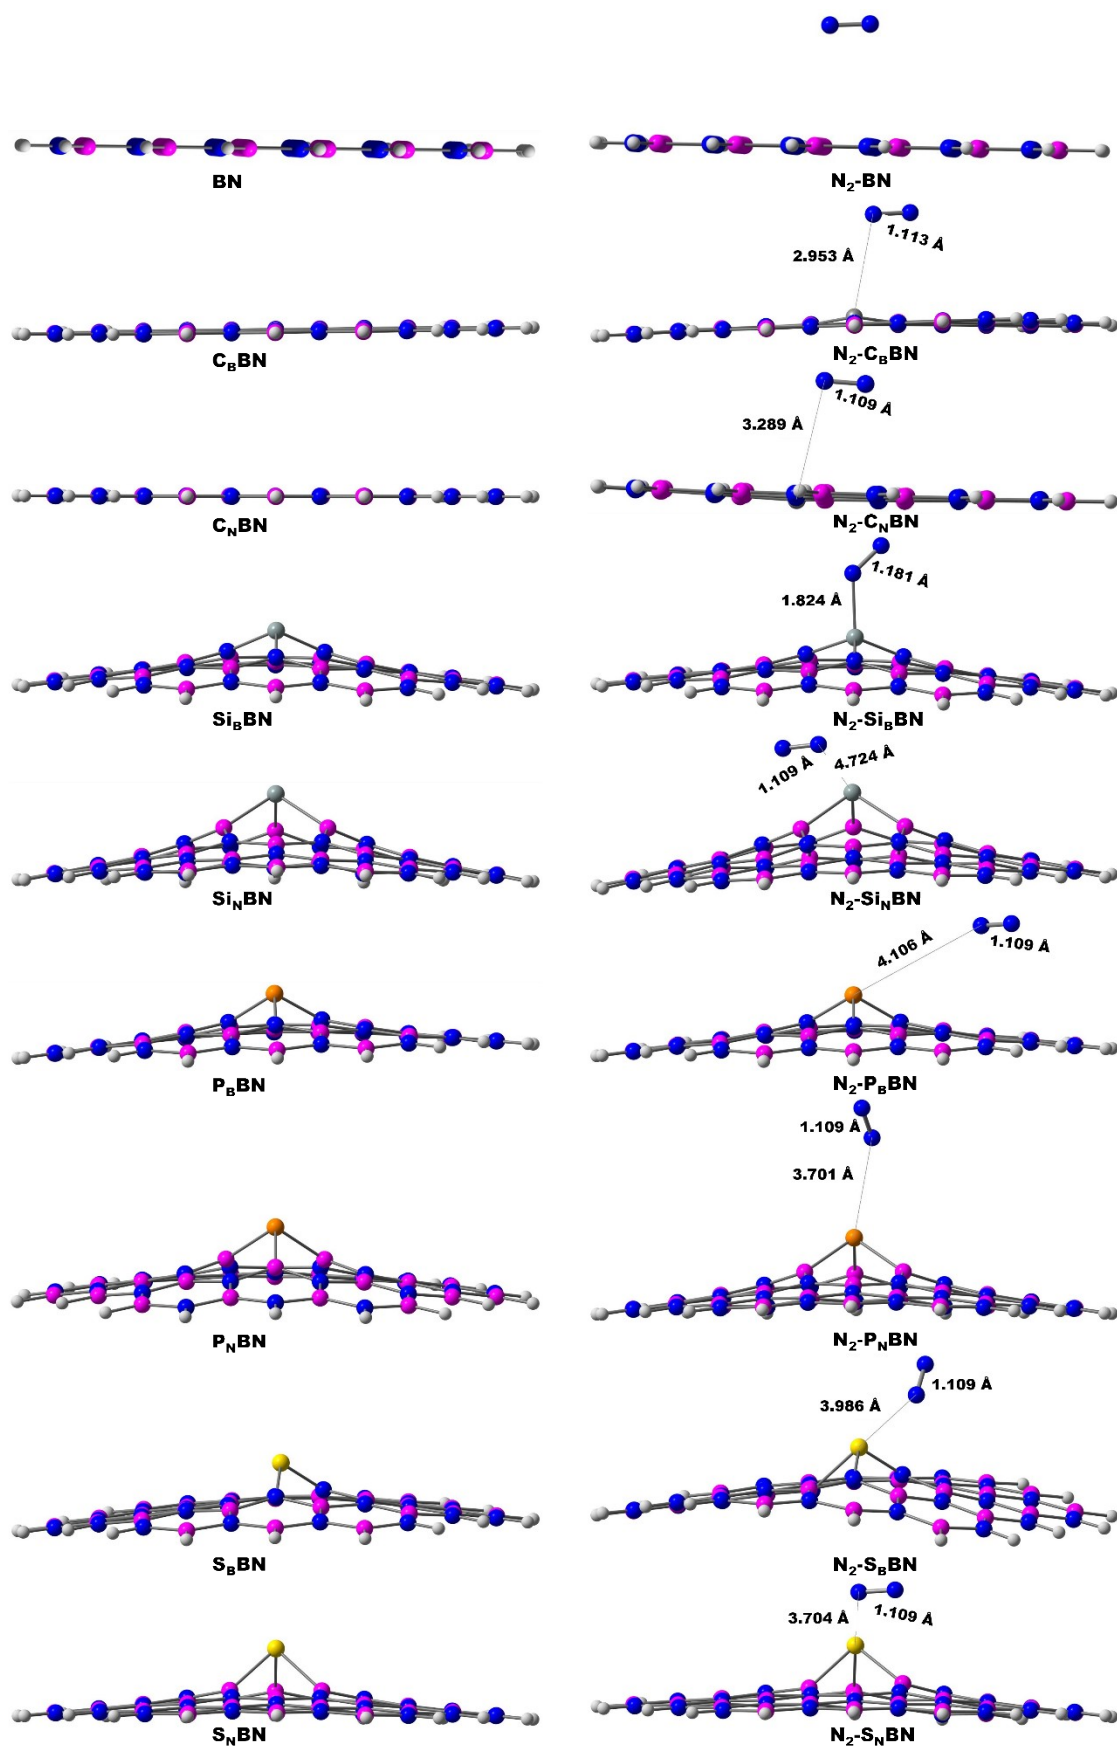

Fig. S1. Optimized geometries of heteroatom doped BN nanosheets and their interaction with  $N_2$  molecule.

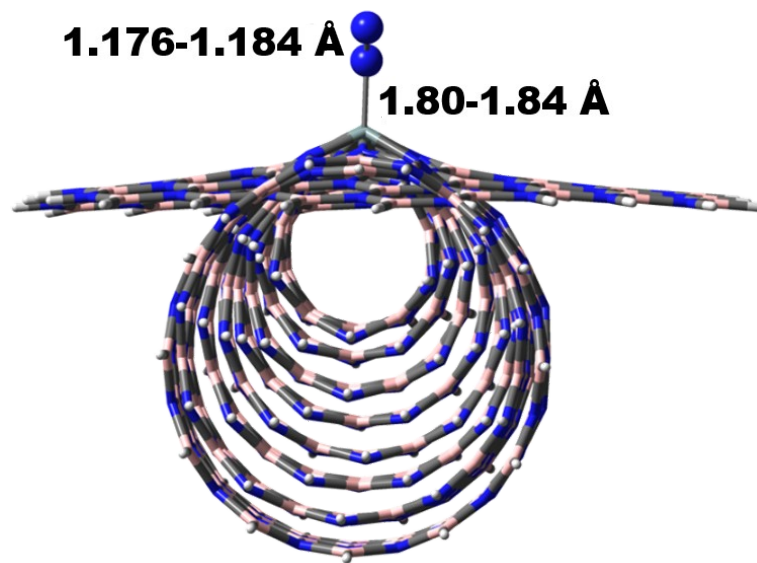

Fig. S2. Nitrogen activation at boron nitride nanomaterials of various diameters.

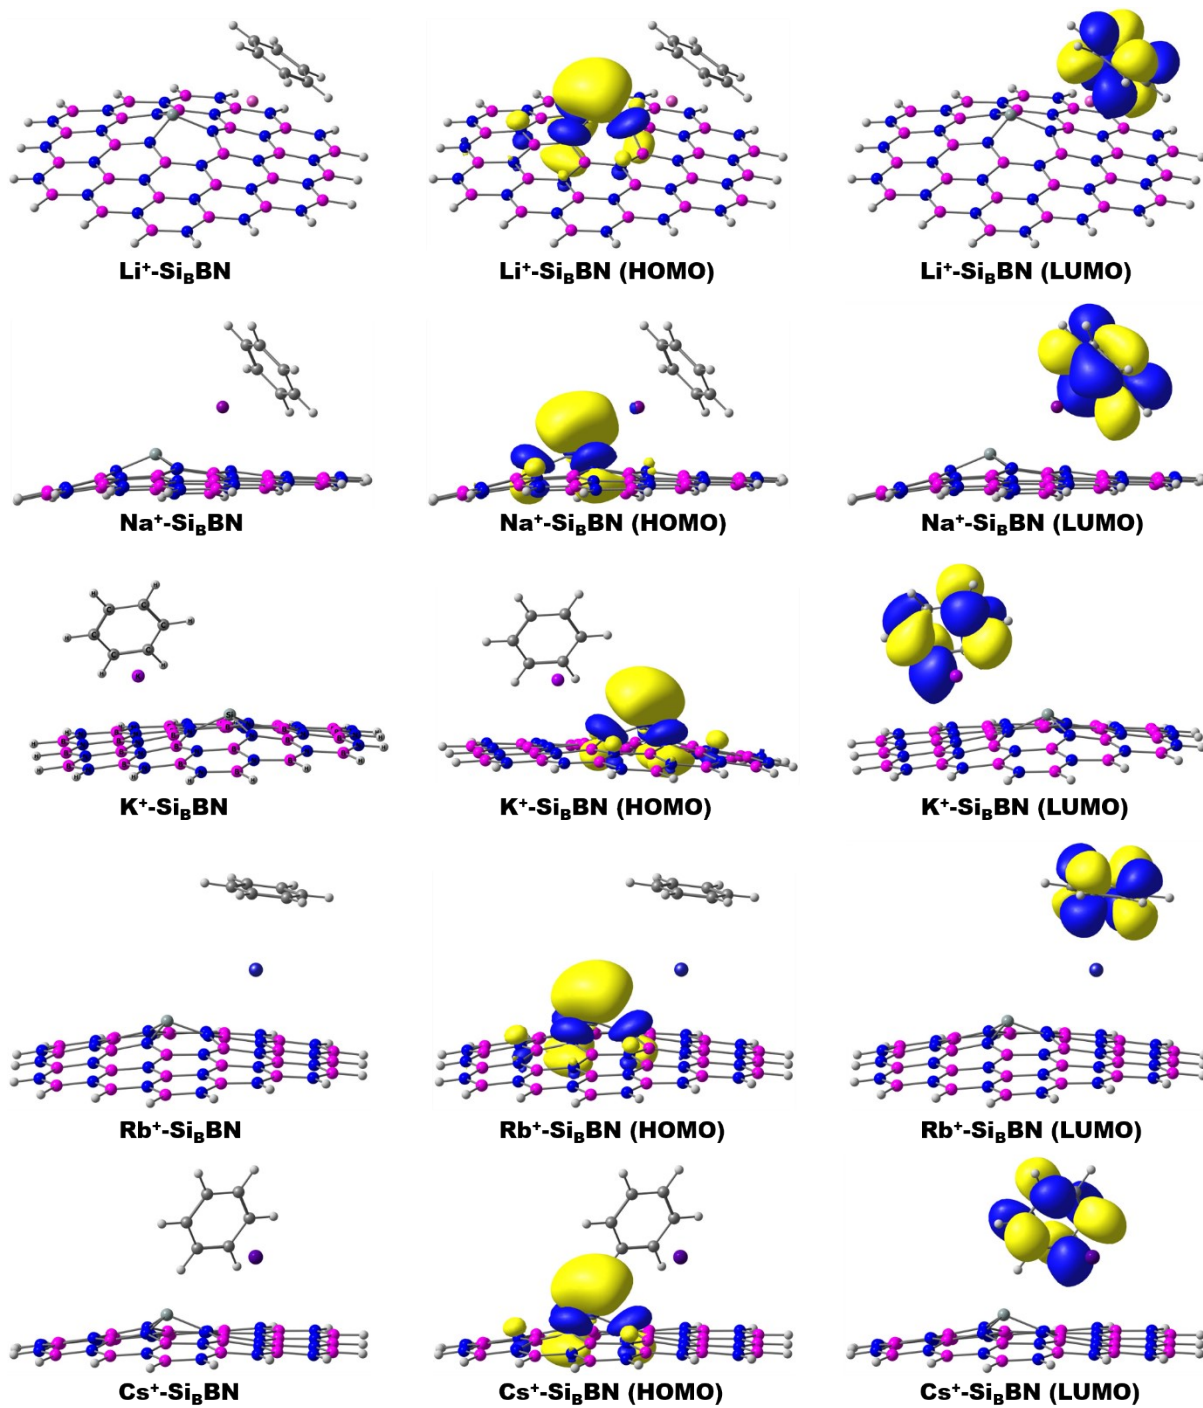

Fig. S3. Lewis acid-base pair formation on interaction of alkali metal ions with Si<sub>B</sub>BN.

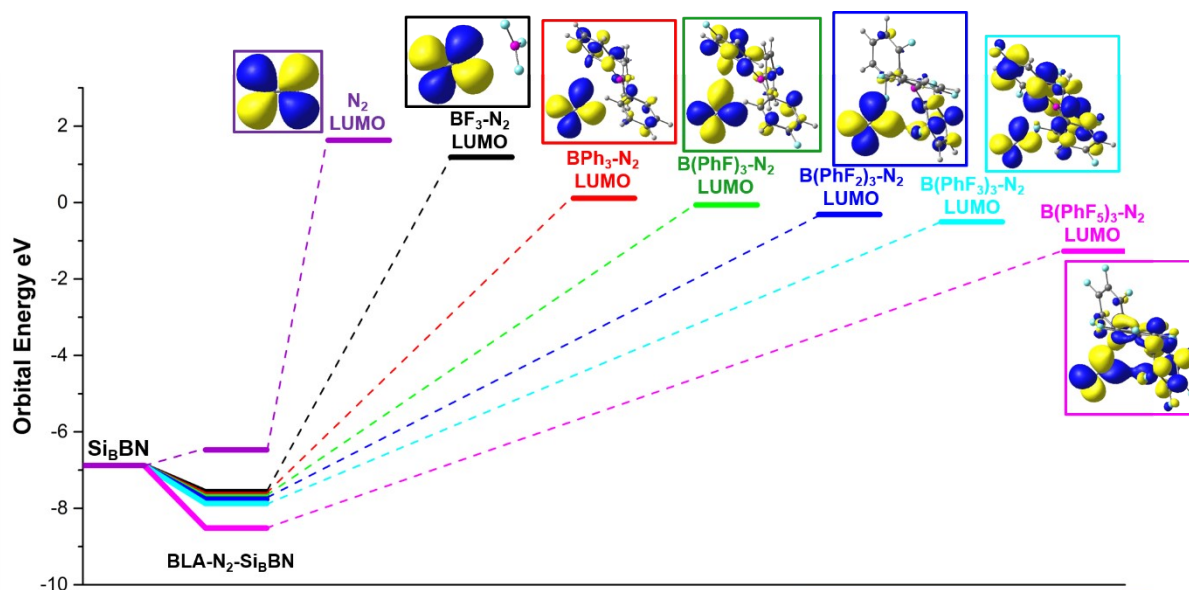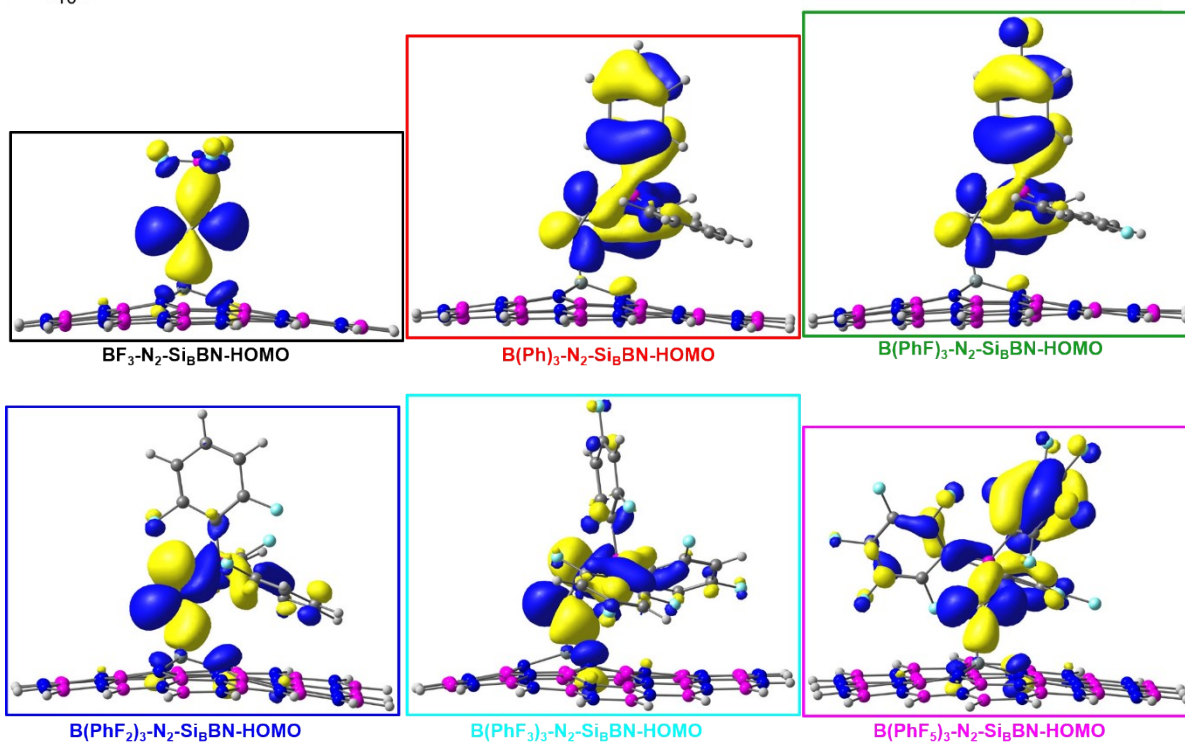

Fig. S4 MO correlation diagram for neutral B-Lewis acids assisted nitrogen activation. Significant stabilization of LUMO of  $N_2$  and HOMO of the activated  $N_2$  species are witnessed.



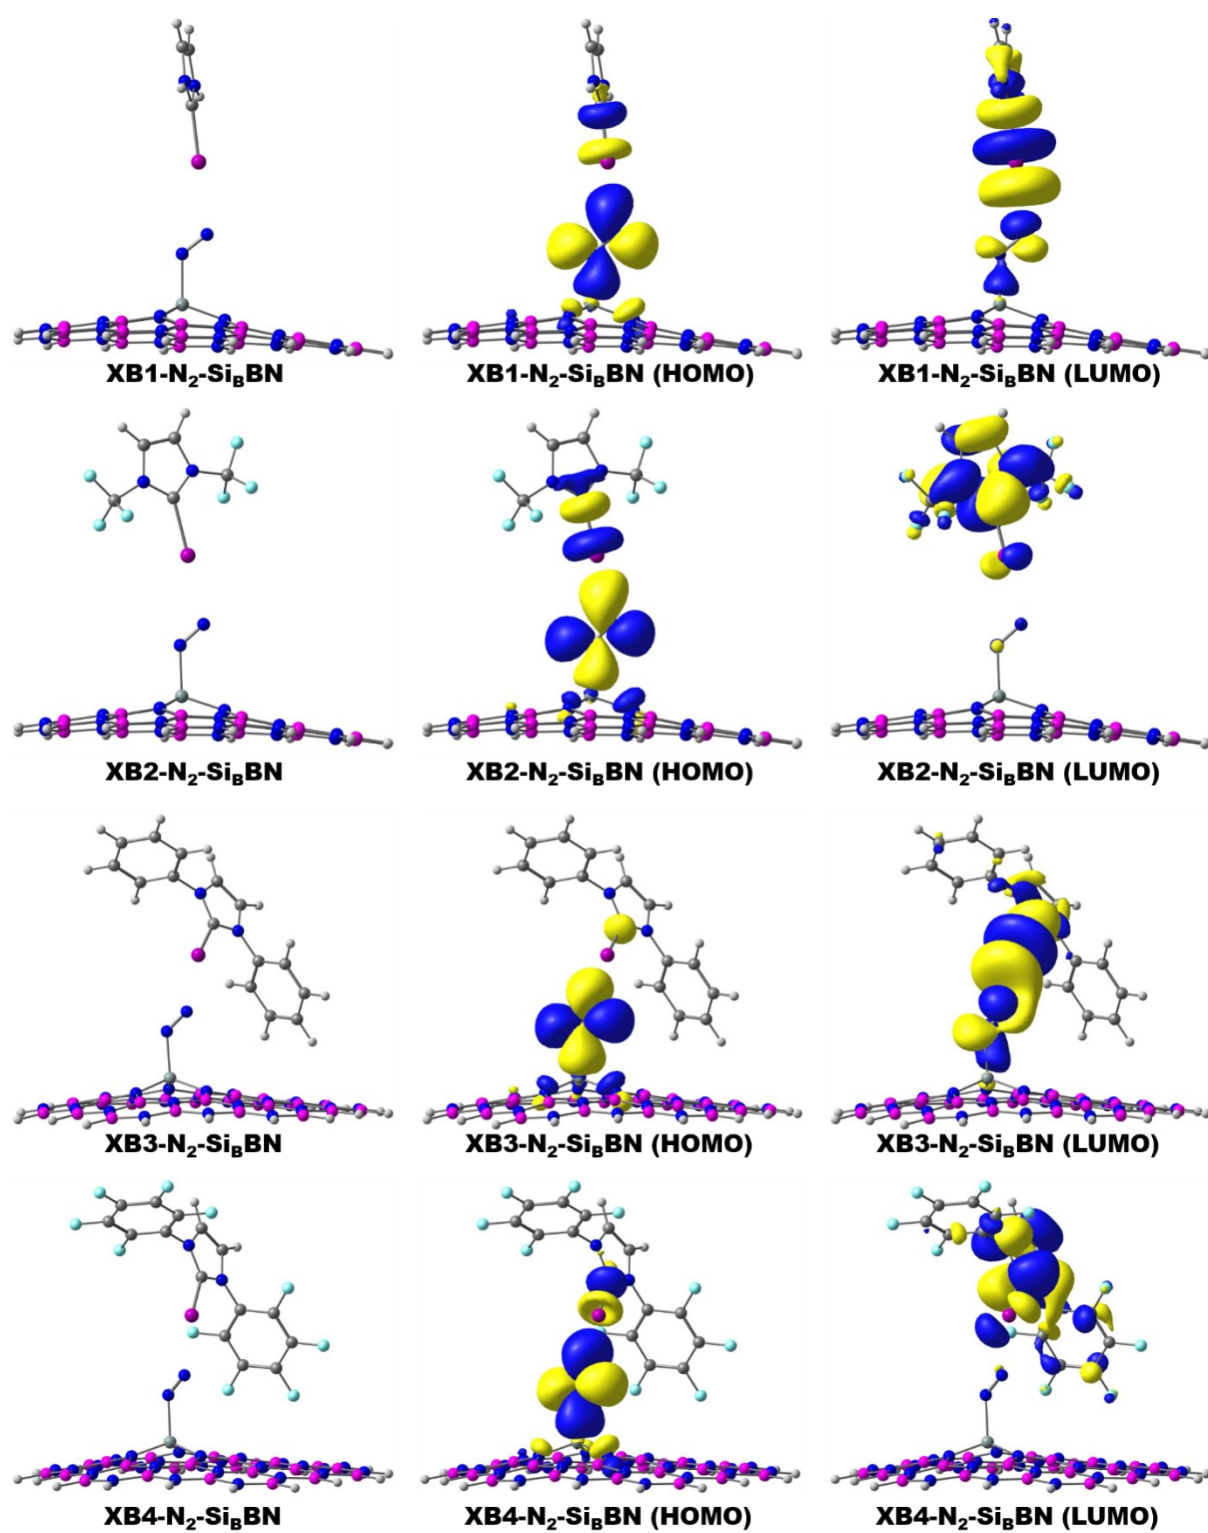

Fig. S5. Optimized geometries and FMO contours of Imidazolium based halogen bond donors (XB1-XB4) assisted N<sub>2</sub>-Si<sub>B</sub>BN system.

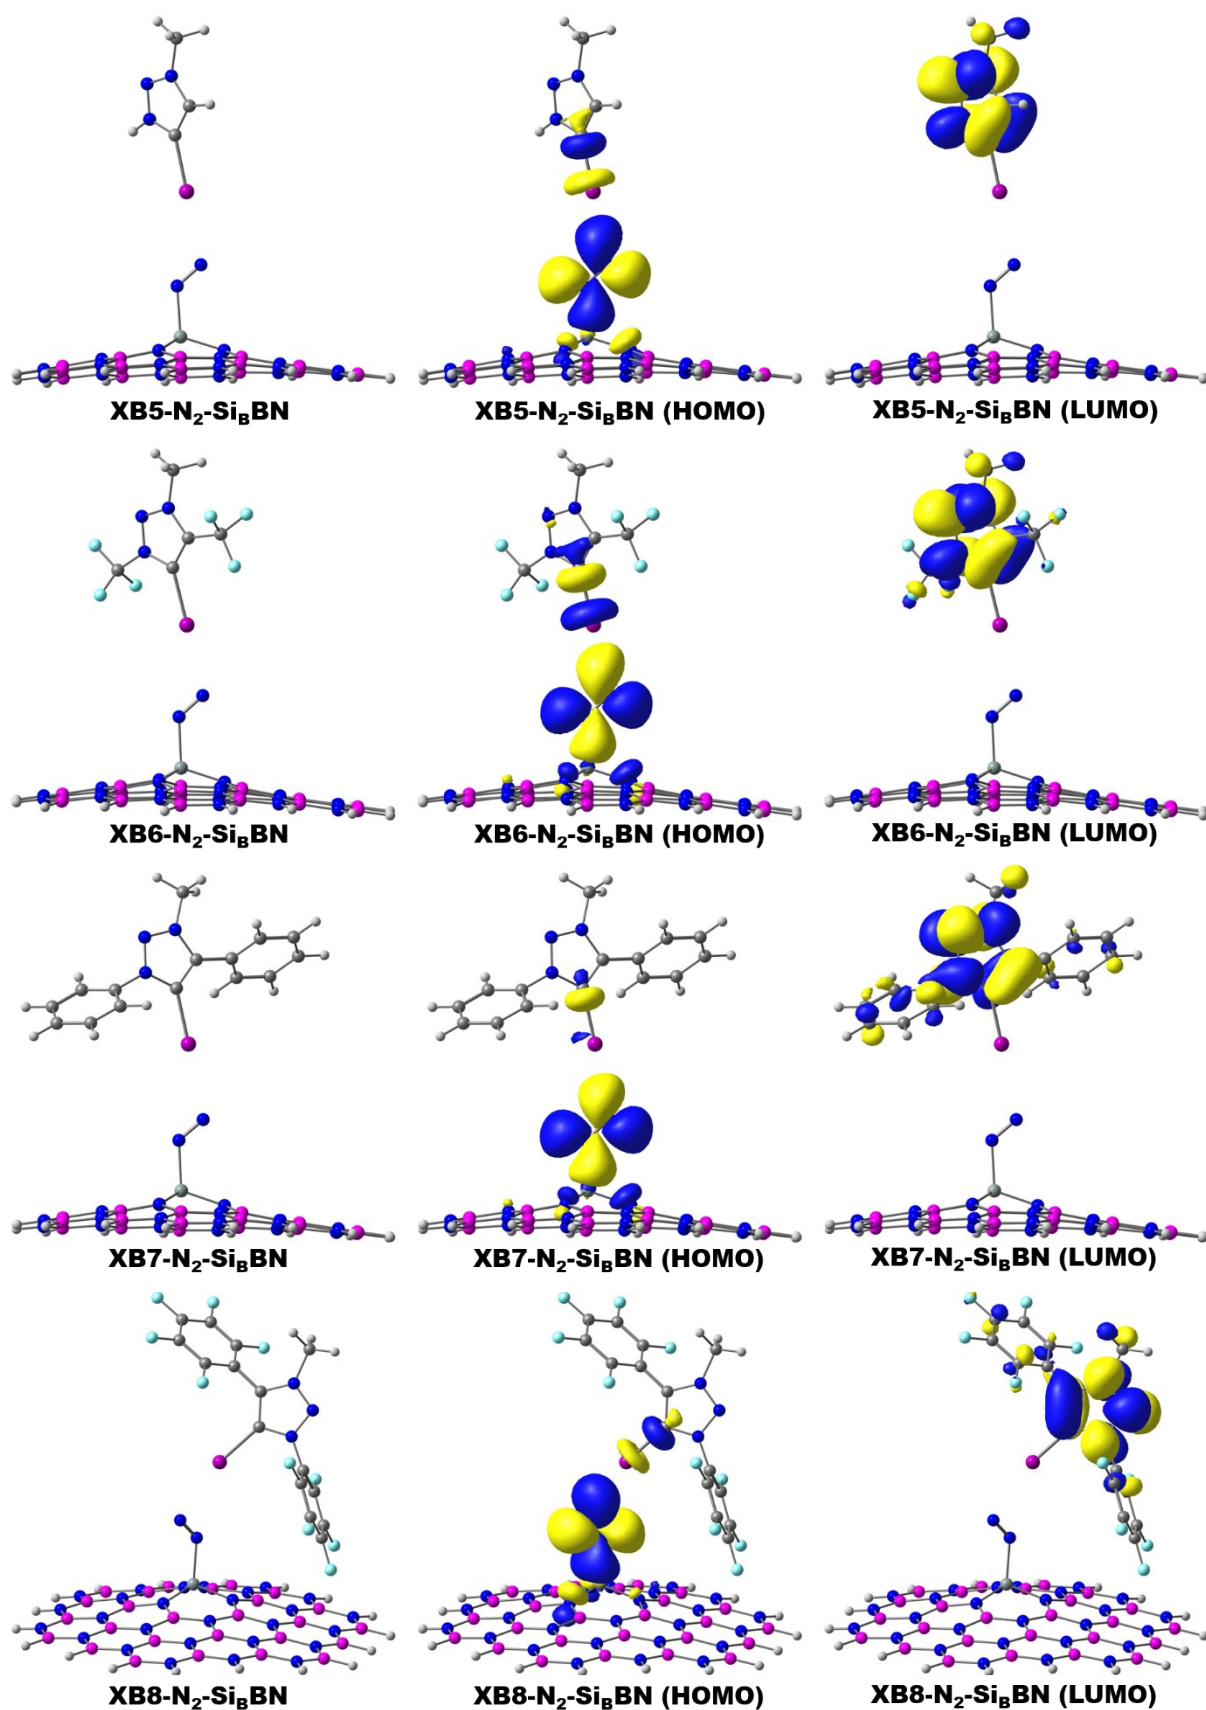

Fig. S6. Optimized geometries and FMO contours of triazole based halogen bond donors (XB5-XB8) assisted N<sub>2</sub>-Si<sub>B</sub>BN system.

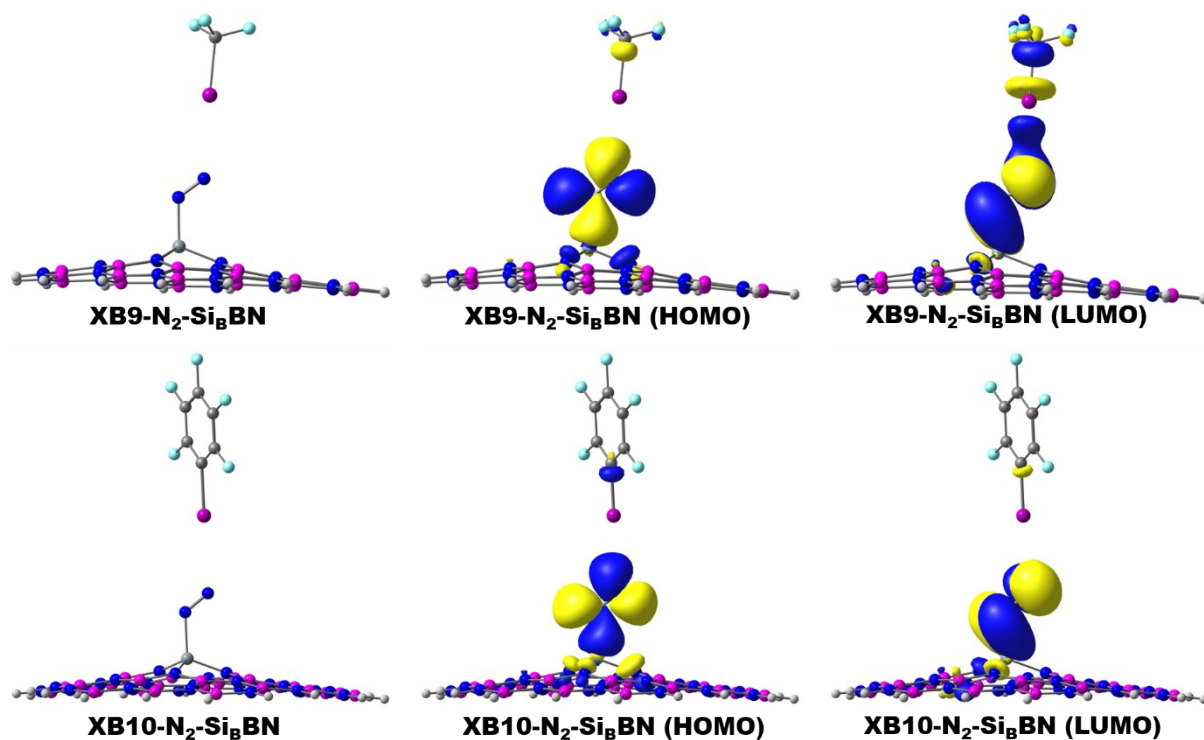

Fig. S7. Optimized geometries and FMO contours of neutral Halogen bond donors (XB9 and XB10) assisted  $N_2$ - $Si_B$ BN system.

Table S1. Cohesive and Defect Formation Energies of Defective BN Sheet.

| S.No. | Defective BN | Cohesive Energy<br>( $E_{\text{coh}}$ , eV) | Defect Formation<br>( $E_{\text{def}}$ , eV) |
|-------|--------------|---------------------------------------------|----------------------------------------------|
| 1     | $C_B$ BN     | -6.21                                       | 1.26                                         |
| 2     | $C_N$ BN     | -6.19                                       | 2.72                                         |
| 3     | $Si_B$ BN    | -6.17                                       | 3.75                                         |
| 4     | $Si_N$ BN    | -6.09                                       | 9.66                                         |
| 5     | $P_B$ BN     | -6.16                                       | 4.34                                         |
| 6     | $P_N$ BN     | -6.13                                       | 6.67                                         |
| 7     | $S_B$ BN     | -6.10                                       | 8.88                                         |
| 8     | $S_N$ BN     | -6.11                                       | 8.49                                         |



Table S2. Population Analysis and Nitrogen Interaction Energies of Various Si Doped Defective BN Nanomaterials.

| BN material               | (Si <sub>B</sub> BN)            |                           | N <sub>2</sub> Activation (N <sub>2</sub> -Si <sub>B</sub> BN) |                 |                 |
|---------------------------|---------------------------------|---------------------------|----------------------------------------------------------------|-----------------|-----------------|
|                           | Spin density on Si <sub>B</sub> | Charge on Si <sub>B</sub> | ΔG <sub>N<sub>2</sub></sub> (eV)                               | Charge (e)      |                 |
|                           |                                 |                           |                                                                | Si <sub>B</sub> | *N <sub>2</sub> |
| BN Sheet                  | 0.793                           | 0.557                     | 0.22                                                           | 0.790           | -0.350          |
| Si <sub>B</sub> BNT(12,0) | 0.792                           | 0.605                     | 0.27                                                           | 0.834           | -0.331          |
| Si <sub>B</sub> BNT(11,0) | 0.792                           | 0.612                     | 0.27                                                           | 0.839           | -0.329          |
| Si <sub>B</sub> BNT(10,0) | 0.792                           | 0.623                     | 0.28                                                           | 0.842           | -0.326          |
| Si <sub>B</sub> BNT(9,0)  | 0.792                           | 0.635                     | 0.29                                                           | 0.860           | -0.324          |
| Si <sub>B</sub> BNT(8,0)  | 0.792                           | 0.653                     | 0.30                                                           | 0.877           | -0.321          |
| Si <sub>B</sub> BNT(7,0)  | 0.791                           | 0.680                     | 0.31                                                           | 0.920           | -0.328          |
| Si <sub>B</sub> BNT(6,0)  | 0.790                           | 0.716                     | 0.34                                                           | 0.948           | -0.313          |
| Si <sub>B</sub> BNT(5,0)  | 0.787                           | 0.750                     | 0.36                                                           | 1.009           | -0.313          |
| Si <sub>B</sub> BNT(4,0)  | 0.777                           | 0.766                     | 0.43                                                           | 1.029           | -0.295          |

Table S3. Geometric parameters, population analysis and overpotential details of Lewis acids assisted N<sub>2</sub>-Si<sub>B</sub>BN nanosheet.

| Structure                                                                                         | Charge |                 |        | Bond Length     |                     |       | Spin Density |       | Potential req. (eV) |                 |
|---------------------------------------------------------------------------------------------------|--------|-----------------|--------|-----------------|---------------------|-------|--------------|-------|---------------------|-----------------|
|                                                                                                   | Si     | *N <sub>2</sub> | Sheet  | *N <sub>2</sub> | Si <sub>B</sub> -N4 | N5-LA | N4           | N5    | ΔG <sub>2</sub>     | ΔG <sub>8</sub> |
| Si <sub>B</sub> BN                                                                                | 0.557  |                 | -0.557 |                 |                     |       |              |       |                     |                 |
| N <sub>2</sub> -Si <sub>B</sub> BN                                                                | 0.790  | -0.350          | 0.350  | 1.181           | 1.824               |       | 0.171        | 0.709 | 0.26                | 2.38            |
| Li <sup>+</sup> -N <sub>2</sub> -Si <sub>B</sub> BN                                               | 0.939  | -0.361          | 0.845  | 1.175           | 1.864               | 2.212 | 0.246        | 0.605 | -0.14               | 1.98            |
| Na <sup>+</sup> -N <sub>2</sub> -Si <sub>B</sub> BN                                               | 0.886  | -0.379          | 0.786  | 1.175           | 1.872               | 2.444 | 0.243        | 0.615 | -0.11               | 2.06            |
| K <sup>+</sup> -N <sub>2</sub> -Si <sub>B</sub> BN                                                | 0.856  | -0.385          | 0.647  | 1.177           | 1.857               | 2.818 | 0.225        | 0.648 | -0.06               | 2.05            |
| Rb <sup>+</sup> -N <sub>2</sub> -Si <sub>B</sub> BN                                               | 0.813  | -0.375          | 0.551  | 1.178           | 1.850               | 3.216 | 0.216        | 0.664 | 0.04                | 2.10            |
| Cs <sup>+</sup> -N <sub>2</sub> -Si <sub>B</sub> BN                                               | 0.804  | -0.376          | 0.535  | 1.177           | 1.854               | 3.005 | 0.221        | 0.658 | 0.05                | 2.18            |
| BF <sub>3</sub> -N <sub>2</sub> -Si <sub>B</sub> BN                                               | 0.800  | -0.349          | 0.454  | 1.172           | 1.844               | 2.019 | 0.273        | 0.573 | -0.23               | 2.11            |
| BCL <sub>3</sub> -N <sub>2</sub> -Si <sub>B</sub> BN                                              | 0.810  | -0.341          | 0.421  | 1.169           | 1.874               | 1.649 | 0.368        | 0.467 | -0.43               | 2.11            |
| B(C <sub>6</sub> H <sub>5</sub> ) <sub>3</sub> -N <sub>2</sub> -Si <sub>B</sub> BN                | 0.803  | -0.324          | 0.453  | 1.167           | 1.860               | 1.675 | 0.300        | 0.504 | -0.35               | 2.14            |
| B(C <sub>6</sub> H <sub>4</sub> F) <sub>3</sub> -N <sub>2</sub> -Si <sub>B</sub> BN               | 0.821  | -0.330          | 0.458  | 1.166           | 1.865               | 1.689 | 0.307        | 0.497 | -0.53               | 2.14            |
| B(C <sub>6</sub> H <sub>3</sub> F <sub>2</sub> ) <sub>3</sub> -N <sub>2</sub> -Si <sub>B</sub> BN | 0.830  | -0.336          | 0.461  | 1.163           | 1.848               | 1.648 | 0.320        | 0.494 | -0.30               | 1.96            |
| B(C <sub>6</sub> H <sub>3</sub> F <sub>3</sub> ) <sub>3</sub> -N <sub>2</sub> -Si <sub>B</sub> BN | 0.855  | -0.344          | 0.469  | 1.173           | 1.879               | 1.596 | 0.313        | 0.536 | -0.49               | 1.89            |
| B(C <sub>6</sub> F <sub>5</sub> ) <sub>3</sub> -N <sub>2</sub> -Si <sub>B</sub> BN                | 0.869  | -0.344          | 0.475  | 1.169           | 1.876               | 1.630 | 0.351        | 0.490 | -0.23               | 1.69            |

Table S4. Geometrical and population analysis results of halogen bond donors augmented N<sub>2</sub>-Si<sub>B</sub>BN system.

| Structure                                  | Charge (e) |                 |          |       |                    | Bond Length (Å) |                     |       |       | Spin Density |       | E(2) of n-σ* kcal/mol | Potential req. (eV) |                 |
|--------------------------------------------|------------|-----------------|----------|-------|--------------------|-----------------|---------------------|-------|-------|--------------|-------|-----------------------|---------------------|-----------------|
|                                            | Si         | *N <sub>2</sub> | BN Sheet | I     | C <sub>Im/Tz</sub> | *N <sub>2</sub> | Si <sub>B</sub> -N4 | N5-I  | I-C   | N4           | N5    |                       | ΔG <sub>2</sub>     | ΔG <sub>8</sub> |
| <b>Si<sub>B</sub>BN</b>                    | 0.557      |                 | -0.557   |       |                    |                 |                     |       |       |              |       |                       |                     |                 |
| <b>N<sub>2</sub>-Si<sub>B</sub>BN</b>      | 0.790      | -0.35           | 0.350    |       |                    | 1.181           | 1.824               |       |       | 0.171        | 0.709 |                       | 0.26                | 2.38            |
| <b>XB1-N<sub>2</sub>-Si<sub>B</sub>BN</b>  | 0.776      | -0.342          | 0.501    | 0.445 | 0.055              | 1.170           | 1.877               | 2.709 | 2.129 | 0.266        | 0.532 | 19.80                 | 0.03                | 0.36            |
| <b>XB2-N<sub>2</sub>-Si<sub>B</sub>BN</b>  | 0.776      | -0.318          | 0.550    | 0.431 | 0.121              | 1.163           | 1.891               | 2.618 | 2.201 | 0.288        | 0.451 | 31.86                 | -0.03               | 0.33            |
| <b>XB3-N<sub>2</sub>-Si<sub>B</sub>BN</b>  | 0.774      | -0.355          | 0.470    | 0.464 | 0.014              | 1.175           | 1.848               | 2.856 | 2.083 | 0.234        | 0.618 | 08.91                 | 0.06                | 0.21            |
| <b>XB4-N<sub>2</sub>-Si<sub>B</sub>BN</b>  | 0.769      | -0.349          | 0.449    | 0.471 | 0.055              | 1.172           | 1.860               | 2.752 | 2.104 | 0.262        | 0.558 | 15.16                 | 0.03                | 0.10            |
| <b>XB5-N<sub>2</sub>-Si<sub>B</sub>BN</b>  | 0.775      | -0.344          | 0.505    | 0.446 | -0.166             | 1.171           | 1.870               | 2.736 | 2.122 | 0.260        | 0.550 | 17.25                 | 0.06                | 0.35            |
| <b>XB6-N<sub>2</sub>-Si<sub>B</sub>BN</b>  | 0.776      | -0.331          | 0.523    | 0.464 | -0.163             | 1.167           | 1.879               | 2.655 | 2.167 | 0.277        | 0.499 | 27.04                 | 0.09                | 0.18            |
| <b>XB7-N<sub>2</sub>-Si<sub>B</sub>BN</b>  | 0.775      | -0.349          | 0.452    | 0.452 | -0.256             | 1.174           | 1.856               | 2.827 | 2.098 | 0.242        | 0.597 | 12.15                 | 0.02                | 0.24            |
| <b>XB8-N<sub>2</sub>-Si<sub>B</sub>BN</b>  | 0.767      | -0.348          | 0.435    | 0.474 | -0.221             | 1.173           | 1.852               | 2.792 | 2.097 | 0.255        | 0.574 | 13.26                 | 0.13                | 0.35            |
| <b>XB9-N<sub>2</sub>-Si<sub>B</sub>BN</b>  | 0.781      | -0.334          | 1.376    | 0.316 | -0.691             | 1.178           | 1.832               | 3.089 | 2.101 | 0.199        | 0.665 | 04.59                 | 0.28                | 0.51            |
| <b>XB10-N<sub>2</sub>-Si<sub>B</sub>BN</b> | 0.782      | -0.335          | 1.373    | 0.172 | 0.546              | 1.179           | 1.833               | 3.130 | 2.184 | 0.194        | 0.670 | 04.33                 | 0.23                | 0.54            |

Table S5: Energetics of elementary steps involved in nitrogen reduction reaction before and after the augmentation of XB4.

| Step   | Without XB4 (eV) |             | With XB4 (eV) |             |
|--------|------------------|-------------|---------------|-------------|
|        | Distal           | Alternating | Distal        | Alternating |
| Step 1 | 0.23             | 0.23        | -0.017        | -0.017      |
| Step 2 | 0.27             | 0.27        | 0.03          | 0.03        |
| Step 3 | -0.24            | -0.32       | -0.65         | -0.45       |
| Step 4 | 0.52             | -1.00       | -0.09         | -1.09       |
| Step 5 | -0.98            | 0.50        | -0.38         | 0.08        |
| Step 6 | -0.03            | -2.15       | -0.05         | -1.99       |
| Step 7 | -2.28            | -0.05       | -2.26         | 0.02        |
| Step 8 | 2.38             | 2.38        | 0.10          | 0.10        |

Table S6. Cartesian coordinates of geometries of heteroatom doped BN sheet and their corresponding N<sub>2</sub> activated systems optimized at  $\omega$ B97X-D/6-31G(d) level of theory.

| C <sub>B</sub> BN |              |              |              | C <sub>N</sub> BN |              |              |              |
|-------------------|--------------|--------------|--------------|-------------------|--------------|--------------|--------------|
| N                 | 5.119406000  | -0.838255000 | -0.000133000 | N                 | 5.083562000  | 1.303051000  | -0.000014000 |
| B                 | 5.943020000  | -2.025047000 | 0.000099000  | B                 | 6.307639000  | 0.536238000  | 0.000084000  |
| B                 | 5.744357000  | 0.450756000  | -0.000270000 | B                 | 5.106950000  | 2.742883000  | -0.000014000 |
| B                 | 5.553984000  | 2.927364000  | -0.000158000 | B                 | 3.928158000  | 4.953647000  | 0.000047000  |
| B                 | 3.302135000  | 4.016241000  | 0.000060000  | B                 | 1.421040000  | 5.069688000  | 0.000028000  |
| B                 | 3.477828000  | 1.519249000  | -0.000332000 | B                 | 2.598071000  | 2.826934000  | -0.000126000 |
| B                 | 3.672357000  | -0.958375000 | -0.000227000 | B                 | 3.809884000  | 0.607467000  | -0.000081000 |
| B                 | 3.888858000  | -3.452249000 | 0.000246000  | B                 | 4.981547000  | -1.603086000 | 0.000074000  |
| B                 | 1.629807000  | -2.364190000 | -0.000172000 | B                 | 2.480638000  | -1.537116000 | -0.000093000 |
| B                 | 1.240921000  | 2.589099000  | -0.000239000 | B                 | 1.335529000  | 0.656134000  | -0.000286000 |
| B                 | -1.015408000 | 3.678225000  | -0.000048000 | B                 | 0.090171000  | 2.977282000  | -0.000214000 |
| B                 | -0.615796000 | -1.292737000 | -0.000384000 | B                 | -2.422209000 | 2.978878000  | -0.000064000 |
| B                 | -0.428995000 | -3.791700000 | -0.000121000 | B                 | -0.043806000 | -1.443389000 | -0.000194000 |
| B                 | -2.679274000 | -2.714382000 | -0.000257000 | B                 | 1.145677000  | -3.650888000 | -0.000049000 |
| B                 | -2.880104000 | -0.225990000 | -0.000266000 | B                 | -1.364621000 | -3.575026000 | -0.000058000 |
| B                 | -3.070011000 | 2.263279000  | -0.000099000 | B                 | -2.569285000 | -1.384407000 | -0.000091000 |
| B                 | -5.329555000 | 3.352952000  | 0.000216000  | B                 | -3.766215000 | 0.836621000  | -0.000022000 |
| B                 | -5.139968000 | 0.853739000  | 0.000100000  | B                 | -6.263743000 | 0.916645000  | 0.000232000  |
| B                 | -4.943859000 | -1.644631000 | -0.000004000 | B                 | -5.069655000 | -1.299120000 | 0.000110000  |
| B                 | -4.741327000 | -4.142777000 | -0.000065000 | B                 | -3.876272000 | -3.512838000 | 0.000061000  |
| N                 | 4.737836000  | 4.086905000  | 0.000116000  | B                 | -2.672603000 | -5.713843000 | 0.000035000  |
| N                 | 4.925883000  | 1.626454000  | -0.000259000 | N                 | 2.715690000  | 5.698707000  | 0.000093000  |
| N                 | 5.318143000  | -3.297931000 | 0.000368000  | N                 | 3.882614000  | 3.506260000  | -0.000049000 |
| N                 | 3.066732000  | -2.262636000 | -0.000044000 | N                 | 6.229186000  | -0.883613000 | 0.000132000  |
| N                 | 2.838090000  | 0.222667000  | -0.000388000 | N                 | 3.751414000  | -0.839173000 | -0.000045000 |
| N                 | 2.675981000  | 2.713029000  | -0.000182000 | N                 | 2.586698000  | 1.369726000  | -0.000188000 |
| N                 | 0.420198000  | 3.779164000  | -0.000012000 | N                 | 1.378249000  | 3.623847000  | -0.000121000 |
| N                 | 0.824302000  | -1.161262000 | -0.000368000 | N                 | -1.156351000 | 3.700525000  | -0.000081000 |
| N                 | 1.004848000  | -3.667579000 | 0.000014000  | N                 | 1.253850000  | -0.780984000 | -0.000214000 |
| N                 | -1.237315000 | -2.598876000 | -0.000265000 | N                 | 2.425378000  | -2.979045000 | -0.000023000 |
| N                 | -1.627716000 | 2.374069000  | -0.000187000 | N                 | -0.087564000 | -2.889148000 | -0.000112000 |
| N                 | -3.889703000 | 3.463251000  | 0.000111000  | N                 | -2.499096000 | 1.523612000  | -0.000154000 |
| N                 | -3.696313000 | 0.965363000  | -0.000105000 | N                 | -4.995430000 | 1.607962000  | 0.000106000  |
| N                 | -3.500449000 | -1.529914000 | -0.000188000 | N                 | -3.795498000 | -0.610936000 | -0.000016000 |

|                         |              |              |              |                         |              |              |              |
|-------------------------|--------------|--------------|--------------|-------------------------|--------------|--------------|--------------|
| N                       | -3.301797000 | -4.027364000 | -0.000150000 | N                       | -2.601358000 | -2.827099000 | -0.000034000 |
| N                       | -5.525630000 | -2.959715000 | 0.000088000  | N                       | -1.400940000 | -5.027240000 | -0.000029000 |
| N                       | -5.732017000 | -0.449502000 | 0.000178000  | N                       | -3.871467000 | -4.951474000 | 0.000085000  |
| N                       | -5.919790000 | 2.062184000  | 0.000323000  | N                       | -5.079731000 | -2.733107000 | 0.000128000  |
| B                       | 1.043593000  | 5.088470000  | 0.000258000  | N                       | -6.271461000 | -0.505363000 | 0.000215000  |
| B                       | -1.217493000 | 6.175859000  | 0.000372000  | B                       | -1.111444000 | 5.146303000  | 0.000079000  |
| B                       | -3.270815000 | 4.759237000  | 0.000209000  | B                       | -3.620959000 | 5.182221000  | 0.000214000  |
| N                       | 2.470696000  | 5.179673000  | 0.000344000  | B                       | -4.931580000 | 3.046639000  | 0.000151000  |
| N                       | 0.199352000  | 6.252820000  | 0.000526000  | N                       | 0.175508000  | 5.790479000  | 0.000106000  |
| N                       | -1.839684000 | 4.874130000  | 0.000181000  | N                       | -2.365536000 | 5.852550000  | 0.000207000  |
| B                       | 1.824956000  | -4.863744000 | 0.000308000  | N                       | -3.663240000 | 3.734636000  | 0.000080000  |
| B                       | -2.488223000 | -5.211107000 | -0.000109000 | B                       | 3.656463000  | -3.740439000 | 0.000082000  |
| N                       | 3.248857000  | -4.731087000 | 0.000485000  | B                       | -0.174937000 | -5.778618000 | -0.000014000 |
| N                       | -1.056675000 | -5.101422000 | 0.000012000  | N                       | 4.904881000  | -3.035003000 | 0.000132000  |
| B                       | -0.239020000 | -6.290378000 | 0.000272000  | N                       | 1.094197000  | -5.102642000 | -0.000007000 |
| N                       | 1.172481000  | -6.145508000 | 0.000488000  | B                       | 2.322143000  | -5.864727000 | 0.000077000  |
| N                       | -1.442371000 | -0.113216000 | -0.000389000 | N                       | 3.564791000  | -5.176058000 | 0.000132000  |
| H                       | -6.016578000 | 4.334246000  | 0.000561000  | N                       | -1.298945000 | -0.703700000 | -0.000225000 |
| H                       | -3.949073000 | 5.745978000  | 0.000448000  | H                       | -7.294141000 | 1.527864000  | 0.000335000  |
| H                       | -1.881027000 | 7.173045000  | 0.000723000  | H                       | -5.946966000 | 3.681832000  | 0.000254000  |
| H                       | 0.621250000  | 7.170253000  | 0.000796000  | H                       | -4.637538000 | 5.816287000  | 0.000323000  |
| H                       | 2.903211000  | 6.092471000  | 0.000577000  | H                       | -2.377180000 | 6.862414000  | 0.000309000  |
| H                       | 5.194328000  | 4.987456000  | 0.000322000  | H                       | 0.206115000  | 6.800818000  | 0.000217000  |
| H                       | 6.747512000  | 3.025795000  | -0.000023000 | H                       | 2.788562000  | 6.706019000  | 0.000166000  |
| H                       | 6.937210000  | 0.545145000  | -0.000169000 | H                       | 4.981479000  | 5.524660000  | 0.000073000  |
| H                       | 7.137135000  | -1.934347000 | 0.000209000  | H                       | 6.159050000  | 3.315240000  | 0.000001000  |
| H                       | 5.909770000  | -4.115966000 | 0.000602000  | H                       | 7.373341000  | 1.083548000  | 0.000118000  |
| H                       | 3.818521000  | -5.565135000 | 0.000721000  | H                       | 7.098348000  | -1.398008000 | 0.000203000  |
| H                       | 1.732254000  | -6.985885000 | 0.000727000  | H                       | 5.763442000  | -3.567744000 | 0.000210000  |
| H                       | -0.739883000 | -7.378378000 | 0.000423000  | H                       | 4.408484000  | -5.730998000 | 0.000193000  |
| H                       | -3.005016000 | -6.291177000 | 0.000055000  | H                       | 2.295565000  | -7.062332000 | 0.000099000  |
| H                       | -5.267603000 | -5.218813000 | 0.000083000  | H                       | -0.210838000 | -6.975487000 | -0.000022000 |
| H                       | -6.530326000 | -3.060525000 | 0.000252000  | H                       | -2.717804000 | -6.910873000 | 0.000034000  |
| H                       | -6.739113000 | -0.528512000 | 0.000361000  | H                       | -4.747036000 | -5.454482000 | 0.000131000  |
| H                       | -6.927930000 | 2.005151000  | 0.000549000  | H                       | -5.968874000 | -3.212955000 | 0.000205000  |
| B                       | -0.810053000 | 1.180747000  | -0.000411000 | H                       | -7.170144000 | -0.966153000 | 0.000302000  |
| N                       | 0.632922000  | 1.275507000  | -0.000385000 | B                       | -1.293454000 | 0.735725000  | -0.000280000 |
| C                       | 1.431985000  | 0.112167000  | -0.000559000 | C                       | 0.044116000  | 1.457320000  | -0.000387000 |
| <b>Si<sub>B</sub>BN</b> |              |              |              | <b>Si<sub>N</sub>BN</b> |              |              |              |
| N                       | 3.663874000  | 3.756326000  | -0.140692000 | N                       | 1.405668000  | -5.008340000 | -0.233039000 |
| B                       | 5.106383000  | 3.749864000  | -0.195595000 | B                       | 0.684086000  | -6.239602000 | -0.447610000 |
| B                       | 2.940194000  | 4.993867000  | -0.246480000 | B                       | 2.837474000  | -4.981835000 | -0.304166000 |
| B                       | 0.782636000  | 6.246819000  | -0.361689000 | B                       | 4.967932000  | -3.748173000 | -0.473200000 |
| B                       | -1.395319000 | 5.018315000  | -0.180287000 | B                       | 5.030576000  | -1.266727000 | -0.233927000 |
| B                       | 0.771868000  | 3.761492000  | -0.023665000 | B                       | 2.870388000  | -2.510741000 | 0.211552000  |
| B                       | 2.943014000  | 2.504500000  | 0.008625000  | B                       | 0.686104000  | -3.779747000 | 0.039185000  |
| B                       | 5.097687000  | 1.245342000  | -0.021518000 | B                       | -1.481959000 | -4.992752000 | -0.238884000 |
| B                       | 2.926036000  | -0.003433000 | 0.165504000  | B                       | -1.494295000 | -2.517663000 | 0.152902000  |
| B                       | 0.790492000  | 1.286421000  | 0.341980000  | B                       | 0.605640000  | -1.467594000 | 0.858463000  |
| B                       | -1.401238000 | 2.555972000  | 0.256852000  | B                       | 3.149415000  | -0.003244000 | 0.721613000  |
| B                       | -3.637044000 | 1.270882000  | 0.172595000  | B                       | 2.875557000  | 2.504846000  | 0.211635000  |
| B                       | 0.787473000  | -1.288232000 | 0.342160000  | B                       | -1.470918000 | 0.001518000  | 0.439302000  |
| B                       | 2.937064000  | -2.511381000 | 0.008524000  | B                       | -3.633980000 | -1.244078000 | 0.054486000  |
| B                       | 0.762989000  | -3.763259000 | -0.023738000 | B                       | -3.631409000 | 1.251541000  | 0.054438000  |
| B                       | -1.407215000 | -2.552670000 | 0.257230000  | B                       | -1.489104000 | 2.520734000  | 0.152861000  |
| B                       | -3.640038000 | -1.262383000 | 0.172791000  | B                       | 0.693891000  | 3.778338000  | 0.039210000  |
| B                       | -5.748358000 | -2.500984000 | -0.354259000 | B                       | 0.696932000  | 6.238192000  | -0.447571000 |
| B                       | -3.575409000 | -3.744809000 | -0.091141000 | B                       | -1.471681000 | 4.995781000  | -0.238966000 |



|                        |              |              |              |                        |              |              |              |
|------------------------|--------------|--------------|--------------|------------------------|--------------|--------------|--------------|
| B                      | -1.407167000 | -5.015005000 | -0.180168000 | B                      | -3.643347000 | 3.747796000  | -0.189591000 |
| B                      | 0.767859000  | -6.248550000 | -0.362354000 | B                      | -5.804129000 | 2.487803000  | -0.215266000 |
| N                      | -0.637940000 | 6.228478000  | -0.351665000 | N                      | 5.667784000  | -2.517312000 | -0.534668000 |
| N                      | 1.502719000  | 5.004019000  | -0.205238000 | N                      | 3.557234000  | -3.744119000 | -0.152985000 |
| N                      | 5.785064000  | 2.505574000  | -0.121987000 | N                      | -0.734097000 | -6.207623000 | -0.425495000 |
| N                      | 3.651197000  | 1.248068000  | 0.069383000  | N                      | -0.760296000 | -3.759980000 | 0.006759000  |
| N                      | 1.504088000  | 2.516862000  | 0.095246000  | N                      | 1.412382000  | -2.575693000 | 0.385927000  |
| N                      | -0.674944000 | 3.778688000  | 0.007775000  | N                      | 3.663479000  | -1.276699000 | 0.257856000  |
| N                      | -2.862249000 | 2.509805000  | 0.176184000  | N                      | 3.666109000  | 1.269169000  | 0.257909000  |
| N                      | -0.630632000 | 1.376818000  | 0.557904000  | N                      | -0.786935000 | -1.299745000 | 0.495112000  |
| N                      | 1.484011000  | -0.001708000 | 0.344097000  | N                      | -2.928222000 | -2.499771000 | 0.003253000  |
| N                      | 3.648239000  | -1.256636000 | 0.069335000  | N                      | -2.904901000 | 0.002986000  | 0.196735000  |
| N                      | 1.498149000  | -2.520327000 | 0.095252000  | N                      | 1.417682000  | 2.572789000  | 0.385960000  |
| N                      | -3.022119000 | 0.003526000  | 0.470126000  | N                      | 1.415986000  | 5.005456000  | -0.232968000 |
| N                      | -5.053782000 | -1.251452000 | -0.159613000 | N                      | -0.752548000 | 3.761539000  | 0.006726000  |
| N                      | -2.868147000 | -2.503101000 | 0.176557000  | N                      | -2.923067000 | 2.505778000  | 0.003179000  |
| N                      | -0.683858000 | -3.777080000 | 0.007978000  | N                      | -5.079947000 | 1.247067000  | -0.068438000 |
| N                      | 1.490838000  | -5.007487000 | -0.205596000 | N                      | -5.077358000 | 3.704263000  | -0.272470000 |
| N                      | -0.652656000 | -6.226896000 | -0.351954000 | N                      | -2.901510000 | 4.966312000  | -0.291694000 |
| N                      | -2.837920000 | -4.970739000 | -0.188938000 | N                      | -0.721319000 | 6.209114000  | -0.425550000 |
| N                      | -5.003372000 | -3.707021000 | -0.277223000 | B                      | 5.033189000  | 1.256400000  | -0.233855000 |
| B                      | -3.566554000 | 3.753145000  | -0.091703000 | B                      | 4.975687000  | 3.737982000  | -0.472947000 |
| B                      | -5.742429000 | 2.514421000  | -0.354855000 | B                      | 2.847742000  | 4.976019000  | -0.304013000 |
| B                      | -5.748223000 | 0.006741000  | -0.280982000 | N                      | 5.699807000  | -0.005853000 | -0.375040000 |
| N                      | -2.826180000 | 4.977348000  | -0.189450000 | N                      | 5.672990000  | 2.505675000  | -0.534516000 |
| N                      | -4.994565000 | 3.718696000  | -0.278053000 | N                      | 3.564956000  | 3.736822000  | -0.152837000 |
| N                      | -5.050788000 | 1.263302000  | -0.159917000 | B                      | -3.651051000 | -3.740316000 | -0.189458000 |
| B                      | 5.094716000  | -1.257404000 | -0.021574000 | B                      | -5.798256000 | 0.005952000  | -0.102603000 |
| B                      | 2.928327000  | -5.000713000 | -0.247048000 | N                      | -2.911724000 | -4.960357000 | -0.291545000 |
| N                      | 5.789373000  | -0.006851000 | -0.019075000 | N                      | -5.082508000 | -1.236641000 | -0.068374000 |
| N                      | 3.654915000  | -3.764923000 | -0.140883000 | B                      | -5.809243000 | -2.475893000 | -0.215126000 |
| B                      | 5.097436000  | -3.761892000 | -0.196017000 | N                      | -5.084969000 | -3.693844000 | -0.272297000 |
| N                      | 5.779101000  | -2.519250000 | -0.122090000 | N                      | -0.784255000 | 1.301367000  | 0.495100000  |
| Si                     | -1.454038000 | 0.001781000  | 1.181897000  | H                      | 1.282527000  | 7.264914000  | -0.641319000 |
| N                      | -0.633778000 | -1.375395000 | 0.558474000  | H                      | 3.448715000  | 5.988303000  | -0.521301000 |
| H                      | -6.924671000 | -2.524159000 | -0.578845000 | H                      | 5.543252000  | 4.764574000  | -0.713706000 |
| H                      | -6.923742000 | 0.008182000  | -0.510345000 | H                      | 6.643428000  | 2.522660000  | -0.812705000 |
| H                      | -6.918665000 | 2.540484000  | -0.579548000 | H                      | 6.655751000  | -0.006838000 | -0.702598000 |
| H                      | -5.487688000 | 4.584920000  | -0.440926000 | H                      | 6.638185000  | -2.536298000 | -0.812858000 |
| H                      | -3.334396000 | 5.834179000  | -0.358280000 | H                      | 5.533361000  | -4.775935000 | -0.713992000 |
| H                      | -1.119402000 | 7.108056000  | -0.470946000 | H                      | 3.436347000  | -5.995344000 | -0.521543000 |
| H                      | 1.371511000  | 7.280046000  | -0.504920000 | H                      | 1.267549000  | -7.267525000 | -0.641408000 |
| H                      | 3.537355000  | 6.023416000  | -0.377843000 | H                      | -1.227185000 | -7.074115000 | -0.585934000 |
| H                      | 5.719099000  | 4.773163000  | -0.305722000 | H                      | -3.413264000 | -5.823192000 | -0.448073000 |
| H                      | 6.793485000  | 2.516485000  | -0.173928000 | H                      | -5.606967000 | -4.550324000 | -0.388477000 |
| H                      | 6.797161000  | -0.008024000 | -0.088870000 | H                      | -7.003946000 | -2.475932000 | -0.299554000 |
| H                      | 6.787496000  | -2.532523000 | -0.173945000 | H                      | -6.992486000 | 0.007172000  | -0.185085000 |
| H                      | 5.707826000  | -4.786566000 | -0.306272000 | H                      | -6.998829000 | 2.490276000  | -0.299705000 |
| H                      | 3.523207000  | -6.031560000 | -0.378668000 | H                      | -5.597597000 | 4.561807000  | -0.388691000 |
| H                      | 1.354476000  | -7.283032000 | -0.505911000 | H                      | -3.401274000 | 5.830168000  | -0.448277000 |
| H                      | -1.136191000 | -7.105331000 | -0.471353000 | H                      | -1.212621000 | 7.076611000  | -0.586038000 |
| H                      | -3.348160000 | -5.826364000 | -0.357817000 | B                      | 0.608661000  | 1.466338000  | 0.858470000  |
| H                      | -5.498557000 | -4.572112000 | -0.439928000 | Si                     | 1.508041000  | -0.001564000 | 1.795601000  |
| <b>P<sub>B</sub>BN</b> |              |              |              | <b>P<sub>N</sub>BN</b> |              |              |              |
| N                      | 3.654598000  | 3.755776000  | -0.134909000 | N                      | -1.410283000 | 5.009070000  | -0.196426000 |
| B                      | 5.098175000  | 3.755346000  | -0.166953000 | B                      | -0.688718000 | 6.248878000  | -0.359964000 |
| B                      | 2.931308000  | 4.993150000  | -0.236650000 | B                      | -2.843254000 | 4.988356000  | -0.269517000 |
| B                      | 0.773182000  | 6.243620000  | -0.330063000 | B                      | -4.986078000 | 3.749127000  | -0.412260000 |

|   |              |              |              |   |              |              |              |
|---|--------------|--------------|--------------|---|--------------|--------------|--------------|
| B | -1.400531000 | 5.005708000  | -0.155817000 | B | -5.029420000 | 1.258482000  | -0.206416000 |
| B | 0.765568000  | 3.751148000  | -0.055917000 | B | -2.864628000 | 2.506772000  | 0.142504000  |
| B | 2.934487000  | 2.500986000  | -0.007992000 | B | -0.686317000 | 3.772383000  | 0.026192000  |
| B | 5.099339000  | 1.252021000  | -0.002405000 | B | 1.480680000  | 5.002335000  | -0.181662000 |
| B | 2.930508000  | 0.000127000  | 0.146526000  | B | 1.490797000  | 2.515567000  | 0.122442000  |
| B | 0.777847000  | 1.267598000  | 0.259732000  | B | -0.632801000 | 1.393715000  | 0.674268000  |
| B | -1.403047000 | 2.527822000  | 0.192897000  | B | -3.047181000 | -0.000376000 | 0.559288000  |
| B | -3.598546000 | 1.259070000  | 0.114829000  | B | -2.863998000 | -2.507478000 | 0.142494000  |
| B | 0.777956000  | -1.267531000 | 0.259737000  | B | 1.477629000  | 0.000183000  | 0.339559000  |
| B | 2.934704000  | -2.500732000 | -0.007984000 | B | 3.640033000  | 1.249917000  | 0.030403000  |
| B | 0.765894000  | -3.751083000 | -0.055914000 | B | 3.640342000  | -1.249016000 | 0.030406000  |
| B | -1.402828000 | -2.527945000 | 0.192895000  | B | 1.491420000  | -2.515196000 | 0.122445000  |
| B | -3.598436000 | -1.259383000 | 0.114820000  | B | -0.685378000 | -3.772547000 | 0.026190000  |
| B | -5.729257000 | -2.499416000 | -0.321101000 | B | -0.687167000 | -6.249045000 | -0.359961000 |
| B | -3.569831000 | -3.751748000 | -0.057017000 | B | 1.481919000  | -5.001969000 | -0.181651000 |
| B | -1.400093000 | -5.005830000 | -0.155826000 | B | 3.651875000  | -3.749096000 | -0.151126000 |
| B | 0.773727000  | -6.243554000 | -0.330055000 | B | 5.813747000  | -2.486711000 | -0.197593000 |
| N | -0.646354000 | 6.220660000  | -0.304887000 | N | -5.682169000 | 2.514055000  | -0.451607000 |
| N | 1.494352000  | 4.998528000  | -0.206848000 | N | -3.563581000 | 3.747935000  | -0.152879000 |
| N | 5.783099000  | 2.514683000  | -0.089211000 | N | 0.729700000  | 6.220314000  | -0.330270000 |
| N | 3.651838000  | 1.251655000  | 0.063412000  | N | 0.758784000  | 3.760292000  | 0.009688000  |
| N | 1.491567000  | 2.504655000  | 0.044481000  | N | -1.412345000 | 2.548648000  | 0.291068000  |
| N | -0.678377000 | 3.757820000  | -0.023120000 | N | -3.630111000 | 1.266010000  | 0.180260000  |
| N | -2.856752000 | 2.505923000  | 0.158067000  | N | -3.629790000 | -1.266909000 | 0.180253000  |
| N | -0.653193000 | 1.318438000  | 0.429135000  | N | 0.777953000  | 1.282384000  | 0.385719000  |
| N | 1.488470000  | 0.000064000  | 0.293795000  | N | 2.928089000  | 2.503505000  | 0.000471000  |
| N | 3.651947000  | -1.251337000 | 0.063417000  | N | 2.914545000  | 0.000362000  | 0.145144000  |
| N | 1.491785000  | -2.504525000 | 0.044486000  | N | -1.411708000 | -2.548990000 | 0.291057000  |
| N | -2.939365000 | -0.000129000 | 0.354246000  | N | -1.409037000 | -5.009413000 | -0.196432000 |
| N | -5.019371000 | -1.249916000 | -0.182871000 | N | 0.759718000  | -3.760103000 | 0.009692000  |
| N | -2.856534000 | -2.506171000 | 0.158055000  | N | 2.928707000  | -2.502780000 | 0.000478000  |
| N | -0.678051000 | -3.757878000 | -0.023123000 | N | 5.089156000  | -1.242948000 | -0.080585000 |
| N | 1.494789000  | -4.998398000 | -0.206839000 | N | 5.086519000  | -3.704460000 | -0.227730000 |
| N | -0.645811000 | -6.220715000 | -0.304889000 | N | 2.912188000  | -4.971652000 | -0.222477000 |
| N | -2.830551000 | -4.975791000 | -0.135382000 | N | 0.731241000  | -6.220133000 | -0.330260000 |
| N | -4.999435000 | -3.711908000 | -0.217676000 | B | -5.029102000 | -1.259736000 | -0.206421000 |
| B | -3.570158000 | 3.751438000  | -0.056998000 | B | -4.985135000 | -3.750366000 | -0.412278000 |
| B | -5.729476000 | 2.498921000  | -0.321079000 | B | -2.842008000 | -4.989054000 | -0.269535000 |
| B | -5.722336000 | -0.000248000 | -0.297089000 | N | -5.706032000 | -0.000711000 | -0.314259000 |
| N | -2.830986000 | 4.975546000  | -0.135365000 | N | -5.681536000 | -2.515472000 | -0.451620000 |
| N | -4.999760000 | 3.711474000  | -0.217647000 | N | -3.562642000 | -3.748813000 | -0.152898000 |
| N | -5.019481000 | 1.249483000  | -0.182859000 | B | 3.650950000  | 3.750000000  | -0.151139000 |
| B | 5.099448000  | -1.251579000 | -0.002397000 | B | 5.804859000  | 0.000715000  | -0.116928000 |
| B | 2.931745000  | -4.992897000 | -0.236633000 | N | 2.910960000  | 4.972370000  | -0.222492000 |
| N | 5.792435000  | 0.000252000  | 0.010479000  | N | 5.088848000  | 1.244205000  | -0.080588000 |
| N | 3.654925000  | -3.755459000 | -0.134895000 | B | 5.813132000  | 2.488143000  | -0.197603000 |
| B | 5.098502000  | -3.754904000 | -0.166931000 | N | 5.085606000  | 3.705714000  | -0.227745000 |
| N | 5.783318000  | -2.514181000 | -0.089192000 | N | 0.778272000  | -1.282187000 | 0.385716000  |
| N | -0.653079000 | -1.318496000 | 0.429145000  | H | -1.271246000 | -7.282348000 | -0.519833000 |
| H | -6.909909000 | -2.514341000 | -0.521222000 | H | -3.439899000 | -6.009764000 | -0.453020000 |
| H | -6.901779000 | -0.000299000 | -0.502551000 | H | -5.564617000 | -4.778429000 | -0.615265000 |
| H | -6.910130000 | 2.513743000  | -0.521197000 | H | -6.666151000 | -2.534970000 | -0.674580000 |
| H | -5.506356000 | 4.575928000  | -0.343823000 | H | -6.682691000 | -0.000833000 | -0.573001000 |
| H | -3.337244000 | 5.839764000  | -0.267923000 | H | -6.666789000 | 2.533300000  | -0.674568000 |
| H | -1.132092000 | 7.101546000  | -0.393002000 | H | -5.565826000 | 4.777041000  | -0.615243000 |
| H | 1.359503000  | 7.280602000  | -0.454584000 | H | -3.441398000 | 6.008919000  | -0.453000000 |
| H | 3.527487000  | 6.025208000  | -0.350851000 | H | -1.273054000 | 7.282037000  | -0.519825000 |
| H | 5.707344000  | 4.782249000  | -0.261738000 | H | 1.220118000  | 7.094291000  | -0.454325000 |

|                        |              |              |              |                        |              |              |              |
|------------------------|--------------|--------------|--------------|------------------------|--------------|--------------|--------------|
| H                      | 6.792132000  | 2.531431000  | -0.124836000 | H                      | 3.413141000  | 5.840219000  | -0.346027000 |
| H                      | 6.801323000  | 0.000295000  | -0.041188000 | H                      | 5.607125000  | 4.565429000  | -0.320019000 |
| H                      | 6.792353000  | -2.530841000 | -0.124812000 | H                      | 7.008084000  | 2.493247000  | -0.277707000 |
| H                      | 5.707760000  | -4.781756000 | -0.261703000 | H                      | 6.999277000  | 0.000862000  | -0.197142000 |
| H                      | 3.528012000  | -6.024904000 | -0.350821000 | H                      | 7.008701000  | -2.491523000 | -0.277694000 |
| H                      | 1.360136000  | -7.280486000 | -0.454566000 | H                      | 5.608249000  | -4.564046000 | -0.319997000 |
| H                      | -1.131472000 | -7.101643000 | -0.393006000 | H                      | 3.414584000  | -5.839376000 | -0.346010000 |
| H                      | -3.336733000 | -5.840053000 | -0.267943000 | H                      | 1.221874000  | -7.093989000 | -0.454315000 |
| H                      | -5.505955000 | -4.576402000 | -0.343858000 | B                      | -0.632455000 | -1.393863000 | 0.674271000  |
| P                      | -1.441719000 | -0.000061000 | 1.212234000  | P                      | -1.484371000 | -0.000181000 | 1.621372000  |
| <b>S<sub>B</sub>BN</b> |              |              |              | <b>S<sub>N</sub>BN</b> |              |              |              |
| N                      | -5.178303000 | -1.008602000 | -0.138930000 | N                      | 1.354881000  | -5.014965000 | -0.162147000 |
| B                      | -6.357933000 | -0.179020000 | -0.145626000 | B                      | 0.617870000  | -6.252043000 | -0.268766000 |
| B                      | -5.288936000 | -2.439190000 | -0.257427000 | B                      | 2.790160000  | -5.032737000 | -0.214613000 |
| B                      | -4.224498000 | -4.701951000 | -0.359873000 | B                      | 4.959779000  | -3.816151000 | -0.314417000 |
| B                      | -1.731168000 | -4.922169000 | -0.188803000 | B                      | 4.989187000  | -1.312295000 | -0.179440000 |
| B                      | -2.798397000 | -2.655044000 | -0.114602000 | B                      | 2.829269000  | -2.546095000 | 0.057539000  |
| B                      | -3.866408000 | -0.392669000 | -0.023054000 | B                      | 0.644471000  | -3.757159000 | -0.014834000 |
| B                      | -4.918202000 | 1.871649000  | 0.032146000  | B                      | -1.536190000 | -4.977261000 | -0.140587000 |
| B                      | -2.421118000 | 1.656006000  | 0.154464000  | B                      | -1.511574000 | -2.479816000 | 0.056568000  |
| B                      | -1.377459000 | -0.618148000 | 0.156493000  | B                      | 0.650790000  | -1.309184000 | 0.399246000  |
| B                      | -0.320328000 | -2.863010000 | 0.088778000  | B                      | 2.920794000  | -0.033530000 | 0.328834000  |
| B                      | 2.202710000  | -3.074651000 | 0.152158000  | B                      | 2.887732000  | 2.480157000  | 0.057736000  |
| B                      | 0.063634000  | 1.461220000  | 0.285281000  | B                      | -1.491377000 | 0.017172000  | 0.198283000  |
| B                      | -0.994210000 | 3.708566000  | 0.006967000  | B                      | -3.666318000 | -1.206261000 | 0.007747000  |
| B                      | 1.499894000  | 3.508493000  | -0.066958000 | B                      | -3.637266000 | 1.290695000  | 0.006927000  |
| B                      | 2.620977000  | 1.299014000  | 0.237490000  | B                      | -1.453450000 | 2.513840000  | 0.055499000  |
| B                      | 3.706418000  | -1.001796000 | 0.169479000  | B                      | 0.731608000  | 3.741106000  | -0.014813000 |
| B                      | 6.133294000  | -1.206471000 | -0.363492000 | B                      | 0.762909000  | 6.236126000  | -0.266699000 |
| B                      | 5.084545000  | 1.059166000  | -0.087307000 | B                      | -1.420086000 | 5.011299000  | -0.141280000 |
| B                      | 4.002950000  | 3.320099000  | -0.221815000 | B                      | -3.605441000 | 3.788015000  | -0.113268000 |
| B                      | 2.901875000  | 5.560664000  | -0.419773000 | B                      | -5.793114000 | 2.561825000  | -0.142099000 |
| N                      | -3.044333000 | -5.495404000 | -0.329063000 | N                      | 5.651347000  | -2.577223000 | -0.342594000 |
| N                      | -4.113375000 | -3.266332000 | -0.247953000 | N                      | 3.528698000  | -3.804735000 | -0.132294000 |
| N                      | -6.203745000 | 1.230535000  | -0.048928000 | N                      | -0.799806000 | -6.208051000 | -0.241840000 |
| N                      | -3.731325000 | 1.044831000  | 0.070302000  | N                      | -0.798565000 | -3.735468000 | -0.019358000 |
| N                      | -2.691681000 | -1.216491000 | -0.010459000 | N                      | 1.388423000  | -2.526190000 | 0.157219000  |
| N                      | -1.620086000 | -3.489790000 | -0.084105000 | N                      | 3.560950000  | -1.303054000 | 0.082974000  |
| N                      | 0.896749000  | -3.677284000 | 0.142695000  | N                      | 3.590463000  | 1.220656000  | 0.083339000  |
| N                      | -0.254525000 | -1.461188000 | 0.164011000  | N                      | -0.779828000 | -1.239789000 | 0.225666000  |
| N                      | -1.234293000 | 0.834936000  | 0.276891000  | N                      | -2.954686000 | -2.460629000 | -0.014555000 |
| N                      | -2.296167000 | 3.098321000  | 0.092196000  | N                      | -2.932368000 | 0.033887000  | 0.084566000  |
| N                      | 0.199599000  | 2.887558000  | 0.061276000  | N                      | 1.446818000  | 2.493264000  | 0.156555000  |
| N                      | 2.451852000  | -1.665750000 | 0.461834000  | N                      | 1.471059000  | 4.982318000  | -0.160681000 |
| N                      | 4.841121000  | -1.824473000 | -0.176673000 | N                      | -0.711554000 | 3.752755000  | -0.020013000 |
| N                      | 3.796450000  | 0.445265000  | 0.193369000  | N                      | -2.896634000 | 2.528204000  | -0.015765000 |
| N                      | 2.703639000  | 2.704796000  | -0.039284000 | N                      | -5.088217000 | 1.304500000  | -0.065338000 |
| N                      | 1.607512000  | 4.944251000  | -0.248865000 | N                      | -5.042607000 | 3.766406000  | -0.160437000 |
| N                      | 4.063024000  | 4.741804000  | -0.409819000 | N                      | -2.850658000 | 5.002156000  | -0.161859000 |
| N                      | 5.164691000  | 2.483065000  | -0.205887000 | N                      | -0.655424000 | 6.224835000  | -0.241246000 |
| N                      | 6.228822000  | 0.206874000  | -0.271997000 | B                      | 5.018502000  | 1.196557000  | -0.179017000 |
| B                      | 0.774776000  | -5.109365000 | -0.055468000 | B                      | 5.047322000  | 3.700520000  | -0.312794000 |
| B                      | 3.265073000  | -5.299634000 | -0.282799000 | B                      | 2.906410000  | 4.967098000  | -0.212377000 |
| B                      | 4.684130000  | -3.253530000 | -0.277991000 | N                      | 5.687873000  | -0.065835000 | -0.252131000 |
| N                      | -0.526021000 | -5.702492000 | -0.154519000 | N                      | 5.709907000  | 2.445827000  | -0.341684000 |
| N                      | 1.981398000  | -5.889117000 | -0.181988000 | N                      | 3.616334000  | 3.722340000  | -0.131047000 |
| N                      | 3.390474000  | -3.863501000 | -0.143345000 | B                      | -3.692661000 | -3.703703000 | -0.111270000 |
| B                      | -3.485783000 | 3.925130000  | 0.041848000  | B                      | -5.818152000 | 0.067371000  | -0.089033000 |

|                                      |              |              |              |                                      |              |              |              |
|--------------------------------------|--------------|--------------|--------------|--------------------------------------|--------------|--------------|--------------|
| B                                    | 0.421154000  | 5.757008000  | -0.267239000 | N                                    | -2.966190000 | -4.934974000 | -0.160083000 |
| N                                    | -4.769573000 | 3.296316000  | 0.064689000  | N                                    | -5.117195000 | -1.186345000 | -0.064285000 |
| N                                    | -0.871490000 | 5.150178000  | -0.132265000 | B                                    | -5.851178000 | -2.427024000 | -0.139721000 |
| B                                    | -2.057335000 | 5.976272000  | -0.148402000 | N                                    | -5.128953000 | -3.648778000 | -0.157589000 |
| N                                    | -3.326275000 | 5.353073000  | -0.043361000 | N                                    | -0.750750000 | 1.257138000  | 0.224409000  |
| N                                    | 1.315120000  | 0.739940000  | 0.528579000  | H                                    | 1.359505000  | 7.268820000  | -0.376317000 |
| H                                    | 7.102335000  | -1.870247000 | -0.593642000 | H                                    | 3.509177000  | 5.993532000  | -0.339609000 |
| H                                    | 5.643912000  | -3.933779000 | -0.497024000 | H                                    | 5.662157000  | 4.718481000  | -0.453511000 |
| H                                    | 4.234206000  | -5.975311000 | -0.479001000 | H                                    | 6.708050000  | 2.442994000  | -0.494664000 |
| H                                    | 1.914389000  | -6.889581000 | -0.302008000 | H                                    | 6.682800000  | -0.077351000 | -0.426718000 |
| H                                    | -0.590875000 | -6.703368000 | -0.276207000 | H                                    | 6.649269000  | -2.597412000 | -0.495703000 |
| H                                    | -3.150466000 | -6.496698000 | -0.404983000 | H                                    | 5.551030000  | -4.847839000 | -0.456120000 |
| H                                    | -5.297426000 | -5.223421000 | -0.477661000 | H                                    | 3.369474000  | -6.072388000 | -0.343583000 |
| H                                    | -6.370689000 | -2.942920000 | -0.366270000 | H                                    | 1.190854000  | -7.297833000 | -0.380442000 |
| H                                    | -7.449605000 | -0.664785000 | -0.236502000 | H                                    | -1.299553000 | -7.081696000 | -0.323115000 |
| H                                    | -7.039909000 | 1.796282000  | -0.066653000 | H                                    | -3.478362000 | -5.802089000 | -0.239493000 |
| H                                    | -5.597115000 | 3.874372000  | 0.026599000  | H                                    | -5.657183000 | -4.507321000 | -0.216951000 |
| H                                    | -4.145095000 | 5.943326000  | -0.069683000 | H                                    | -7.047735000 | -2.428025000 | -0.192549000 |
| H                                    | -1.968904000 | 7.166185000  | -0.253987000 | H                                    | -7.014198000 | 0.081385000  | -0.142529000 |
| H                                    | 0.516192000  | 6.942852000  | -0.401147000 | H                                    | -6.989324000 | 2.590865000  | -0.195603000 |
| H                                    | 3.000045000  | 6.744274000  | -0.572428000 | H                                    | -5.550712000 | 4.636938000  | -0.220933000 |
| H                                    | 4.958123000  | 5.192764000  | -0.532315000 | H                                    | -3.342605000 | 5.880840000  | -0.241821000 |
| H                                    | 6.066906000  | 2.903816000  | -0.378330000 | H                                    | -1.134863000 | 7.109785000  | -0.322376000 |
| H                                    | 7.132997000  | 0.625360000  | -0.436998000 | B                                    | 0.681344000  | 1.293114000  | 0.397403000  |
| S                                    | 1.374243000  | -0.726973000 | 1.361065000  | S                                    | 1.455768000  | -0.016725000 | 1.569987000  |
| <b>N<sub>2</sub>-C<sub>B</sub>BN</b> |              |              |              | <b>N<sub>2</sub>-C<sub>N</sub>BN</b> |              |              |              |
| N                                    | 4.671104000  | -2.085462000 | -0.194432000 | N                                    | 1.653677000  | -4.976009000 | -0.093578000 |
| B                                    | 6.009380000  | -1.541231000 | -0.203527000 | B                                    | 2.959027000  | -5.592940000 | -0.051188000 |
| B                                    | 4.491697000  | -3.505983000 | -0.222731000 | B                                    | 0.454040000  | -5.772468000 | -0.080609000 |
| B                                    | 2.984552000  | -5.478376000 | -0.231040000 | B                                    | -2.042432000 | -5.972834000 | -0.074335000 |
| B                                    | 0.505241000  | -5.166971000 | -0.158323000 | B                                    | -3.492323000 | -3.925324000 | -0.123131000 |
| B                                    | 2.010452000  | -3.167105000 | -0.142121000 | B                                    | -0.970012000 | -3.706696000 | -0.161541000 |
| B                                    | 3.524201000  | -1.196685000 | -0.142944000 | B                                    | 1.552329000  | -3.529280000 | -0.139960000 |
| B                                    | 5.067029000  | 0.773943000  | -0.166003000 | B                                    | 4.045024000  | -3.323102000 | -0.088227000 |
| B                                    | 2.579843000  | 1.090107000  | -0.142812000 | B                                    | 2.640716000  | -1.253636000 | -0.159793000 |
| B                                    | -0.441905000 | -2.846278000 | -0.096738000 | B                                    | 0.176584000  | -1.473609000 | -0.233386000 |
| B                                    | -2.927381000 | -2.529438000 | -0.086968000 | B                                    | -2.449056000 | -1.676818000 | -0.210080000 |
| B                                    | 0.114447000  | 1.415594000  | -0.094492000 | B                                    | -3.805661000 | 0.436751000  | -0.164853000 |
| B                                    | 1.631420000  | 3.407329000  | -0.198853000 | B                                    | 1.200838000  | 0.820806000  | -0.200411000 |
| B                                    | -0.840497000 | 3.732393000  | -0.124538000 | B                                    | 3.700130000  | 1.010262000  | -0.134054000 |
| B                                    | -2.363937000 | 1.758567000  | -0.028637000 | B                                    | 2.282294000  | 3.081875000  | -0.132646000 |
| B                                    | -3.878685000 | -0.224418000 | -0.024037000 | B                                    | -0.211615000 | 2.914106000  | -0.159059000 |
| B                                    | -6.366549000 | 0.093015000  | 0.028622000  | B                                    | -2.727079000 | 2.723573000  | -0.141624000 |
| B                                    | -4.846164000 | 2.085263000  | 0.022936000  | B                                    | -4.141528000 | 4.781995000  | -0.054008000 |
| B                                    | -3.320674000 | 4.072443000  | -0.036677000 | B                                    | -1.632380000 | 4.972362000  | -0.086991000 |
| B                                    | -1.790565000 | 6.054081000  | -0.148497000 | B                                    | 0.874727000  | 5.162082000  | -0.089415000 |
| N                                    | 1.669586000  | -6.007829000 | -0.203689000 | B                                    | 3.376875000  | 5.336689000  | -0.069578000 |
| N                                    | 3.165130000  | -4.045455000 | -0.205398000 | N                                    | -3.323817000 | -5.354131000 | -0.083614000 |
| N                                    | 6.180849000  | -0.134303000 | -0.179112000 | N                                    | -0.848778000 | -5.153863000 | -0.110256000 |
| N                                    | 3.729497000  | 0.224366000  | -0.127922000 | N                                    | 4.112192000  | -4.761234000 | -0.053585000 |
| N                                    | 2.179828000  | -1.730807000 | -0.107183000 | N                                    | 2.738618000  | -2.699792000 | -0.134183000 |
| N                                    | 0.690899000  | -3.733189000 | -0.114351000 | N                                    | 0.250922000  | -2.911036000 | -0.187211000 |
| N                                    | -1.778767000 | -3.396101000 | -0.115279000 | N                                    | -2.298548000 | -3.109647000 | -0.173439000 |
| N                                    | 1.249475000  | 0.516632000  | -0.102758000 | N                                    | -3.730212000 | -1.017735000 | -0.175315000 |
| N                                    | 2.765423000  | 2.521856000  | -0.200002000 | N                                    | 1.342460000  | -0.629349000 | -0.209907000 |
| N                                    | 0.304333000  | 2.847976000  | -0.147275000 | N                                    | 3.824730000  | -0.429520000 | -0.132117000 |
| N                                    | -2.729380000 | -1.102590000 | -0.059197000 | N                                    | 2.393893000  | 1.637295000  | -0.162556000 |
| N                                    | -5.219626000 | -0.783765000 | -0.012064000 | N                                    | -2.621851000 | 1.286689000  | -0.189670000 |

|                                       |              |              |              |                                       |              |              |              |
|---------------------------------------|--------------|--------------|--------------|---------------------------------------|--------------|--------------|--------------|
| N                                     | -3.696641000 | 1.204666000  | -0.003367000 | N                                     | -4.039179000 | 3.341853000  | -0.097241000 |
| N                                     | -2.173450000 | 3.188726000  | -0.057684000 | N                                     | -1.524299000 | 3.528994000  | -0.134161000 |
| N                                     | -0.647630000 | 5.171573000  | -0.171621000 | N                                     | 0.985227000  | 3.719366000  | -0.130181000 |
| N                                     | -3.091743000 | 5.491400000  | -0.076496000 | N                                     | 3.485036000  | 3.896139000  | -0.100587000 |
| N                                     | -4.631806000 | 3.500469000  | 0.018415000  | N                                     | 2.088030000  | 5.934435000  | -0.065489000 |
| N                                     | -6.158000000 | 1.496825000  | 0.048332000  | N                                     | -0.430858000 | 5.754587000  | -0.073420000 |
| B                                     | -1.971286000 | -4.833270000 | -0.144105000 | N                                     | -2.948596000 | 5.555827000  | -0.054077000 |
| B                                     | -4.459236000 | -4.512563000 | -0.122437000 | B                                     | -4.922814000 | -1.835168000 | -0.125857000 |
| B                                     | -5.407403000 | -2.207053000 | -0.046035000 | B                                     | -6.306710000 | 0.257656000  | -0.082842000 |
| N                                     | -0.825692000 | -5.688496000 | -0.162542000 | B                                     | -5.216081000 | 2.512081000  | -0.087368000 |
| N                                     | -3.313767000 | -5.348892000 | -0.152763000 | N                                     | -4.771023000 | -3.265828000 | -0.112565000 |
| N                                     | -4.270152000 | -3.082573000 | -0.086530000 | N                                     | -6.193729000 | -1.160716000 | -0.090189000 |
| B                                     | 4.104024000  | 3.078842000  | -0.227786000 | N                                     | -5.110997000 | 1.073721000  | -0.116476000 |
| B                                     | 0.678236000  | 5.719368000  | -0.239906000 | B                                     | 5.129629000  | -1.054885000 | -0.092633000 |
| N                                     | 5.226748000  | 2.193592000  | -0.201070000 | B                                     | 4.779055000  | 3.269530000  | -0.089562000 |
| N                                     | 1.818010000  | 4.846484000  | -0.249066000 | N                                     | 5.209171000  | -2.486401000 | -0.076084000 |
| B                                     | 3.150623000  | 5.397769000  | -0.298070000 | N                                     | 4.894621000  | 1.836520000  | -0.102239000 |
| N                                     | 4.255253000  | 4.507686000  | -0.283676000 | B                                     | 6.198383000  | 1.214043000  | -0.073109000 |
| N                                     | -1.219256000 | 0.879611000  | -0.033584000 | N                                     | 6.288916000  | -0.203707000 | -0.069363000 |
| H                                     | -7.476780000 | -0.356060000 | 0.044503000  | N                                     | -0.099668000 | 1.478027000  | -0.210609000 |
| H                                     | -6.513458000 | -2.665285000 | -0.040584000 | H                                     | -5.211649000 | 5.319402000  | -0.018043000 |
| H                                     | -5.559179000 | -4.986430000 | -0.126245000 | H                                     | -6.297842000 | 3.024752000  | -0.049129000 |
| H                                     | -3.460007000 | -6.347771000 | -0.175129000 | H                                     | -7.388112000 | 0.772193000  | -0.045516000 |
| H                                     | -0.961128000 | -6.689053000 | -0.189951000 | H                                     | -7.049599000 | -1.695978000 | -0.060213000 |
| H                                     | 1.562019000  | -7.011368000 | -0.228627000 | H                                     | -5.604652000 | -3.836292000 | -0.076585000 |
| H                                     | 3.931927000  | -6.209573000 | -0.274833000 | H                                     | -4.132592000 | -5.958100000 | -0.052238000 |
| H                                     | 5.439637000  | -4.235218000 | -0.260316000 | H                                     | -1.954230000 | -7.166957000 | -0.032637000 |
| H                                     | 6.959537000  | -2.269595000 | -0.231886000 | H                                     | 0.540281000  | -6.966313000 | -0.039216000 |
| H                                     | 7.122731000  | 0.228930000  | -0.195293000 | H                                     | 3.072676000  | -6.784928000 | -0.012065000 |
| H                                     | 6.158522000  | 2.582616000  | -0.226830000 | H                                     | 5.013983000  | -5.214799000 | -0.021320000 |
| H                                     | 5.182566000  | 4.906350000  | -0.311569000 | H                                     | 6.120461000  | -2.921661000 | -0.044426000 |
| H                                     | 3.323214000  | 6.581815000  | -0.349357000 | H                                     | 7.210849000  | -0.615017000 | -0.044851000 |
| H                                     | 0.833959000  | 6.905460000  | -0.288575000 | H                                     | 7.192338000  | 1.882297000  | -0.049836000 |
| H                                     | -1.644483000 | 7.242157000  | -0.190980000 | H                                     | 5.767335000  | 3.945287000  | -0.065846000 |
| H                                     | -3.878403000 | 6.124323000  | -0.063440000 | H                                     | 4.360276000  | 6.020423000  | -0.045841000 |
| H                                     | -5.432749000 | 4.115911000  | 0.032656000  | H                                     | 2.038932000  | 6.942722000  | -0.040312000 |
| H                                     | -6.971988000 | 2.093831000  | 0.071744000  | H                                     | -0.506402000 | 6.761604000  | -0.041357000 |
| B                                     | -1.393483000 | -0.548219000 | -0.051320000 | H                                     | -3.044731000 | 6.560630000  | -0.021765000 |
| N                                     | -0.233396000 | -1.413313000 | -0.061324000 | B                                     | -1.308737000 | 0.697005000  | -0.234663000 |
| C                                     | 1.068550000  | -0.873952000 | 0.098938000  | C                                     | -1.194551000 | -0.818423000 | -0.266787000 |
| N                                     | 1.635662000  | -0.498281000 | 2.973009000  | N                                     | -0.657998000 | -0.444415000 | 2.956086000  |
| N                                     | 1.984062000  | 0.548776000  | 2.989525000  | N                                     | 0.235472000  | 0.198647000  | 2.905818000  |
| <b>N<sub>2</sub>-Si<sub>B</sub>BN</b> |              |              |              | <b>N<sub>2</sub>-Si<sub>N</sub>BN</b> |              |              |              |
| N                                     | 3.980458000  | 3.495195000  | -0.192389000 | N                                     | 3.434402000  | -4.020197000 | -0.250502000 |
| B                                     | 5.419943000  | 3.385645000  | -0.224834000 | B                                     | 3.279360000  | -5.438001000 | -0.471591000 |
| B                                     | 3.348661000  | 4.782514000  | -0.295481000 | B                                     | 4.734442000  | -3.416366000 | -0.279117000 |
| B                                     | 1.287282000  | 6.188532000  | -0.429825000 | B                                     | 6.189659000  | -1.427044000 | -0.393306000 |
| B                                     | -0.976398000 | 5.119211000  | -0.293992000 | B                                     | 5.238341000  | 0.867747000  | -0.176533000 |
| B                                     | 1.094705000  | 3.708218000  | -0.117352000 | B                                     | 3.749476000  | -1.143920000 | 0.210902000  |
| B                                     | 3.171286000  | 2.296980000  | -0.065406000 | B                                     | 2.271192000  | -3.188191000 | -0.014802000 |
| B                                     | 5.229977000  | 0.886248000  | -0.072976000 | B                                     | 0.788682000  | -5.175907000 | -0.336872000 |
| B                                     | 2.973311000  | -0.205613000 | 0.073622000  | B                                     | -0.235341000 | -2.916624000 | 0.014319000  |
| B                                     | 0.935784000  | 1.234761000  | 0.221484000  | B                                     | 1.235034000  | -1.104679000 | 0.765199000  |
| B                                     | -1.164548000 | 2.663304000  | 0.117213000  | B                                     | 2.973109000  | 1.263016000  | 0.694526000  |
| B                                     | -3.489593000 | 1.540322000  | -0.003094000 | B                                     | 1.728726000  | 3.445907000  | 0.133462000  |
| B                                     | 0.748908000  | -1.337362000 | 0.209160000  | B                                     | -1.238889000 | -0.601842000 | 0.250037000  |
| B                                     | 2.807811000  | -2.710078000 | -0.078486000 | B                                     | -2.703179000 | -2.617280000 | -0.157084000 |
| B                                     | 0.548847000  | -3.805278000 | -0.141795000 | B                                     | -3.708315000 | -0.333156000 | -0.201712000 |



|    |              |              |              |    |              |              |              |
|----|--------------|--------------|--------------|----|--------------|--------------|--------------|
| B  | -1.535136000 | -2.444323000 | 0.087897000  | B  | -2.263485000 | 1.694040000  | -0.074222000 |
| B  | -3.672579000 | -0.995346000 | -0.021648000 | B  | -0.772815000 | 3.726070000  | -0.139090000 |
| B  | -5.857275000 | -2.077371000 | -0.561303000 | B  | -1.746936000 | 5.974738000  | -0.669032000 |
| B  | -3.778952000 | -3.475123000 | -0.285287000 | B  | -3.235495000 | 3.963017000  | -0.499927000 |
| B  | -1.704729000 | -4.899727000 | -0.331860000 | B  | -4.720446000 | 1.945025000  | -0.475363000 |
| B  | 0.380437000  | -6.285522000 | -0.467534000 | B  | -6.188763000 | -0.080464000 | -0.516662000 |
| N  | -0.131202000 | 6.272313000  | -0.441922000 | N  | 6.335910000  | -0.018306000 | -0.442267000 |
| N  | 1.914504000  | 4.895591000  | -0.276089000 | N  | 4.887723000  | -1.993857000 | -0.117117000 |
| N  | 6.006276000  | 2.095170000  | -0.153921000 | N  | 1.969843000  | -5.983812000 | -0.487753000 |
| N  | 3.785638000  | 0.992029000  | -0.005018000 | N  | 0.942500000  | -3.755951000 | -0.090204000 |
| N  | 1.734911000  | 2.412663000  | -0.000267000 | N  | 2.436983000  | -1.793188000 | 0.337891000  |
| N  | -0.348332000 | 3.829092000  | -0.107407000 | N  | 3.974603000  | 0.305403000  | 0.268541000  |
| N  | -2.623328000 | 2.716535000  | 0.011712000  | N  | 2.948837000  | 2.635432000  | 0.229083000  |
| N  | -0.480135000 | 1.428987000  | 0.418067000  | N  | -0.091321000 | -1.514713000 | 0.351740000  |
| N  | 1.530651000  | -0.100893000 | 0.223546000  | N  | -1.548951000 | -3.480462000 | -0.171135000 |
| N  | 3.604010000  | -1.507259000 | -0.011569000 | N  | -2.543397000 | -1.180501000 | -0.026650000 |
| N  | 1.370068000  | -2.617052000 | -0.016164000 | N  | 0.362936000  | 2.917533000  | 0.253229000  |
| N  | -2.970295000 | 0.226235000  | 0.285707000  | N  | -0.598936000 | 5.139664000  | -0.408380000 |
| N  | -5.077701000 | -0.878908000 | -0.358070000 | N  | -2.086717000 | 3.125474000  | -0.218672000 |
| N  | -2.986882000 | -2.284780000 | -0.015328000 | N  | -3.564757000 | 1.099705000  | -0.255788000 |
| N  | -0.896523000 | -3.715623000 | -0.138089000 | N  | -5.028611000 | -0.923088000 | -0.344361000 |
| N  | 1.188445000  | -5.098072000 | -0.305728000 | N  | -6.013245000 | 1.325613000  | -0.578302000 |
| N  | -1.035376000 | -6.162762000 | -0.482221000 | N  | -4.530094000 | 3.358317000  | -0.583836000 |
| N  | -3.128487000 | -4.749996000 | -0.369982000 | N  | -3.032621000 | 5.375016000  | -0.688920000 |
| N  | -5.198351000 | -3.332751000 | -0.485799000 | B  | 4.222761000  | 3.177078000  | -0.211844000 |
| B  | -3.234758000 | 4.010953000  | -0.246974000 | B  | 3.176538000  | 5.423428000  | -0.491650000 |
| B  | -5.494831000 | 2.933240000  | -0.526943000 | B  | 0.723722000  | 5.693017000  | -0.425887000 |
| B  | -5.680222000 | 0.427714000  | -0.471400000 | N  | 5.347200000  | 2.291838000  | -0.309772000 |
| N  | -2.406441000 | 5.178738000  | -0.325604000 | N  | 4.314617000  | 4.578782000  | -0.506948000 |
| N  | -4.660101000 | 4.078695000  | -0.442641000 | N  | 1.874810000  | 4.851303000  | -0.225671000 |
| N  | -4.896457000 | 1.632490000  | -0.339090000 | B  | -1.702683000 | -4.908360000 | -0.359485000 |
| B  | 5.048443000  | -1.610769000 | -0.079741000 | B  | -5.183381000 | -2.349247000 | -0.371349000 |
| B  | 2.623852000  | -5.193359000 | -0.325193000 | N  | -0.530003000 | -5.725058000 | -0.426004000 |
| N  | 5.829749000  | -0.412241000 | -0.067423000 | N  | -4.027586000 | -3.196525000 | -0.307210000 |
| N  | 3.435526000  | -4.011534000 | -0.213552000 | B  | -4.186905000 | -4.624984000 | -0.448849000 |
| B  | 4.875619000  | -4.110345000 | -0.248998000 | N  | -3.030477000 | -5.445945000 | -0.474144000 |
| N  | 5.642068000  | -2.918216000 | -0.169195000 | N  | -1.136835000 | 0.863924000  | 0.302236000  |
| Si | -1.407623000 | 0.109078000  | 0.928837000  | H  | -1.617097000 | 7.149223000  | -0.865299000 |
| N  | -0.681427000 | -1.322174000 | 0.388374000  | H  | 0.873761000  | 6.861561000  | -0.638544000 |
| H  | -7.030757000 | -2.015460000 | -0.790986000 | H  | 3.291866000  | 6.592062000  | -0.726263000 |
| H  | -6.851301000 | 0.515180000  | -0.704474000 | H  | 5.205973000  | 4.987447000  | -0.747859000 |
| H  | -6.665336000 | 3.046826000  | -0.752197000 | H  | 6.233440000  | 2.676973000  | -0.605334000 |
| H  | -5.090096000 | 4.979466000  | -0.596824000 | H  | 7.239905000  | 0.356965000  | -0.690261000 |
| H  | -2.850203000 | 6.072076000  | -0.486706000 | H  | 7.128486000  | -2.137854000 | -0.610902000 |
| H  | -0.546145000 | 7.185475000  | -0.558483000 | H  | 5.699316000  | -4.098598000 | -0.470695000 |
| H  | 1.951086000  | 7.177727000  | -0.552403000 | H  | 4.235332000  | -6.139775000 | -0.639537000 |
| H  | 4.020033000  | 5.767604000  | -0.405527000 | H  | 1.874673000  | -6.975830000 | -0.650596000 |
| H  | 6.106524000  | 4.362911000  | -0.313156000 | H  | -0.635458000 | -6.717912000 | -0.579726000 |
| H  | 7.013706000  | 2.034713000  | -0.188612000 | H  | -3.159167000 | -6.441047000 | -0.586679000 |
| H  | 6.835940000  | -0.485322000 | -0.120002000 | H  | -5.276794000 | -5.110108000 | -0.555996000 |
| H  | 6.647612000  | -3.003470000 | -0.206358000 | H  | -6.274192000 | -2.831904000 | -0.473097000 |
| H  | 5.414616000  | -5.175042000 | -0.350199000 | H  | -7.281060000 | -0.561321000 | -0.617854000 |
| H  | 3.146913000  | -6.263586000 | -0.445602000 | H  | -6.833251000 | 1.899258000  | -0.712796000 |
| H  | 0.895320000  | -7.359121000 | -0.596754000 | H  | -5.332161000 | 3.946107000  | -0.761838000 |
| H  | -1.577767000 | -7.005839000 | -0.604064000 | H  | -3.826652000 | 5.969070000  | -0.879334000 |
| H  | -3.696649000 | -5.568281000 | -0.539145000 | B  | 0.053630000  | 1.578840000  | 0.714568000  |
| H  | -5.753983000 | -4.159893000 | -0.651029000 | Si | 1.430520000  | 0.601466000  | 1.709417000  |
| N  | -1.555244000 | 0.208960000  | 2.744355000  | N  | -2.962919000 | -0.321527000 | 3.180435000  |

|   |                                      |              |              |   |                           |              |              |
|---|--------------------------------------|--------------|--------------|---|---------------------------|--------------|--------------|
| N | -1.202027000                         | -0.603317000 | 3.526068000  | N | -2.955952000              | 0.774533000  | 3.067282000  |
|   | <b>N<sub>2</sub>-P<sub>B</sub>BN</b> |              |              |   | <b>N<sub>2</sub>-PNBN</b> |              |              |
| N | -5.234046000                         | 1.372088000  | -0.026536000 | N | 1.663499000               | -4.868242000 | -0.492767000 |
| B | -5.932918000                         | 2.635501000  | -0.024229000 | B | 1.040275000               | -6.163674000 | -0.627340000 |
| B | -5.969876000                         | 0.140084000  | -0.101874000 | B | 3.083839000               | -4.727293000 | -0.642387000 |
| B | -6.022986000                         | -2.353678000 | -0.196644000 | B | 5.106764000               | -3.312939000 | -0.882890000 |
| B | -3.882555000                         | -3.656705000 | -0.102940000 | B | 4.953367000               | -0.827800000 | -0.664695000 |
| B | -3.829077000                         | -1.153984000 | -0.009579000 | B | 2.920379000               | -2.253973000 | -0.213747000 |
| B | -3.783348000                         | 1.349302000  | 0.038356000  | B | 0.851988000               | -3.697658000 | -0.220477000 |
| B | -3.737947000                         | 3.848457000  | 0.048226000  | B | -1.212439000              | -5.106144000 | -0.313184000 |
| B | -1.588608000                         | 2.556420000  | 0.094564000  | B | -1.414458000              | -2.630357000 | 0.009868000  |
| B | -1.650631000                         | 0.059108000  | 0.210545000  | B | 0.634973000               | -1.333149000 | 0.444267000  |
| B | -1.699912000                         | -2.459263000 | 0.152519000  | B | 2.915387000               | 0.258295000  | 0.205427000  |
| B | 0.467225000                          | -3.767875000 | -0.012453000 | B | 2.499373000               | 2.740967000  | -0.186986000 |
| B | 0.564571000                          | 1.286163000  | 0.100699000  | B | -1.600535000              | -0.123296000 | 0.239200000  |
| B | 0.588306000                          | 3.770013000  | -0.163733000 | B | -3.664384000              | -1.550852000 | 0.058806000  |
| B | 2.725979000                          | 2.475826000  | -0.320769000 | B | -3.874405000              | 0.939519000  | 0.070986000  |
| B | 2.714841000                          | -0.013386000 | -0.070345000 | B | -1.837082000              | 2.381374000  | 0.031877000  |
| B | 2.667948000                          | -2.549099000 | -0.119803000 | B | 0.217900000               | 3.816621000  | -0.184898000 |
| B | 4.766443000                          | -3.817152000 | -0.624756000 | B | -0.010064000              | 6.284693000  | -0.557030000 |
| B | 4.824583000                          | -1.318587000 | -0.394111000 | B | -2.053577000              | 4.859525000  | -0.263738000 |
| B | 4.864989000                          | 1.187128000  | -0.516082000 | B | -4.105703000              | 3.429598000  | -0.101220000 |
| B | 4.890243000                          | 3.688573000  | -0.685810000 | B | -6.153293000              | 1.991055000  | -0.001157000 |
| N | -5.315519000                         | -3.584785000 | -0.197276000 | N | 5.695444000               | -2.024268000 | -0.948310000 |
| N | -5.278417000                         | -1.119885000 | -0.102165000 | N | 3.704024000               | -3.431755000 | -0.552474000 |
| N | -5.176268000                         | 3.835341000  | 0.025596000  | N | -0.371461000              | -6.255533000 | -0.516883000 |
| N | -3.035158000                         | 2.581940000  | 0.078898000  | N | -0.587558000              | -3.808142000 | -0.154245000 |
| N | -3.086712000                         | 0.084957000  | 0.059251000  | N | 1.486588000               | -2.417521000 | 0.011591000  |
| N | -3.135129000                         | -2.420588000 | -0.003611000 | N | 3.580085000               | -0.953724000 | -0.210933000 |
| N | -0.979697000                         | -3.721233000 | 0.092980000  | N | 3.368319000               | 1.569887000  | -0.195571000 |
| N | -0.995249000                         | -1.217103000 | 0.353615000  | N | -0.793953000              | -1.341837000 | 0.237745000  |
| N | -0.884951000                         | 1.294682000  | 0.207158000  | N | -2.852184000              | -2.739619000 | -0.024547000 |
| N | -0.847031000                         | 3.793375000  | -0.021871000 | N | -3.040970000              | -0.244592000 | 0.132900000  |
| N | 1.290671000                          | 2.508939000  | -0.150357000 | N | 1.058166000               | 2.658476000  | 0.033998000  |
| N | 1.259404000                          | -2.579899000 | 0.182548000  | N | 0.821845000               | 5.110352000  | -0.439014000 |
| N | 3.335750000                          | -3.799652000 | -0.431712000 | N | -1.219709000              | 3.682776000  | -0.120722000 |
| N | 3.399336000                          | -1.295396000 | -0.123021000 | N | -3.272916000              | 2.248251000  | -0.001648000 |
| N | 3.430052000                          | 1.214825000  | -0.327181000 | N | -5.321509000              | 0.811782000  | 0.058711000  |
| N | 3.458375000                          | 3.717380000  | -0.500196000 | N | -5.533533000              | 3.265102000  | -0.080434000 |
| N | 5.557099000                          | 2.434849000  | -0.691683000 | N | -3.476240000              | 4.709378000  | -0.217566000 |
| N | 5.531988000                          | -0.078800000 | -0.511732000 | N | -1.417360000              | 6.136283000  | -0.451232000 |
| N | 5.476626000                          | -2.589980000 | -0.562962000 | B | 4.742565000               | 1.681664000  | -0.649687000 |
| B | -1.732969000                         | -4.949166000 | -0.083219000 | B | 4.478699000               | 4.160756000  | -0.831607000 |
| B | 0.395628000                          | -6.236279000 | -0.422767000 | B | 2.246274000               | 5.212498000  | -0.580878000 |
| B | 2.578665000                          | -5.020948000 | -0.500991000 | N | 5.515863000               | 0.483983000  | -0.799196000 |
| N | -3.163920000                         | -4.894106000 | -0.105562000 | N | 5.274072000               | 2.989223000  | -0.915249000 |
| N | -1.013373000                         | -6.182531000 | -0.262704000 | N | 3.074978000               | 4.037951000  | -0.506924000 |
| N | 1.150541000                          | -5.009187000 | -0.328651000 | B | -3.475180000              | -4.042537000 | -0.139263000 |
| B | -1.549237000                         | 5.060194000  | -0.050354000 | B | -5.931091000              | -0.488016000 | 0.067693000  |
| B | 2.758393000                          | 4.972751000  | -0.491856000 | N | -2.640111000              | -5.197459000 | -0.267477000 |
| N | -2.978019000                         | 5.060909000  | 0.030180000  | N | -5.112411000              | -1.667238000 | 0.044979000  |
| N | 1.331804000                          | 5.007441000  | -0.322566000 | B | -5.734866000              | -2.968362000 | -0.030705000 |
| B | 0.632391000                          | 6.270584000  | -0.315970000 | N | -4.910392000              | -4.119654000 | -0.121439000 |
| N | -0.779514000                         | 6.269565000  | -0.169924000 | N | -1.009102000              | 1.212947000  | 0.248358000  |
| N | 1.307329000                          | 0.058062000  | 0.232009000  | H | 0.477541000               | 7.363114000  | -0.741142000 |
| H | 5.342978000                          | -4.845769000 | -0.833749000 | H | 2.747499000               | 6.280538000  | -0.784108000 |
| H | 3.140695000                          | -6.055889000 | -0.716338000 | H | 4.961638000               | 5.234709000  | -1.049601000 |
| H | 0.945147000                          | -7.279428000 | -0.633020000 | H | 6.242125000               | 3.093235000  | -1.182992000 |

|         |              |              |              |         |              |              |              |
|---------|--------------|--------------|--------------|---------|--------------|--------------|--------------|
| H       | -1.528558000 | -7.045772000 | -0.358775000 | H       | 6.475731000  | 0.566092000  | -1.103871000 |
| H       | -3.679517000 | -5.756238000 | -0.213385000 | H       | 6.666152000  | -1.961578000 | -1.219164000 |
| H       | -5.853682000 | -4.436653000 | -0.263357000 | H       | 5.758914000  | -4.288174000 | -1.123053000 |
| H       | -7.217931000 | -2.341184000 | -0.277089000 | H       | 3.754455000  | -5.693016000 | -0.867697000 |
| H       | -7.165060000 | 0.163761000  | -0.169372000 | H       | 1.699508000  | -7.142830000 | -0.830231000 |
| H       | -7.129258000 | 2.673317000  | -0.068411000 | H       | -0.793150000 | -7.167118000 | -0.620660000 |
| H       | -5.680742000 | 4.710051000  | 0.014494000  | H       | -3.073787000 | -6.104473000 | -0.365997000 |
| H       | -3.467971000 | 5.943965000  | 0.003331000  | H       | -5.362321000 | -5.020384000 | -0.184512000 |
| H       | -1.253498000 | 7.161186000  | -0.179596000 | H       | -6.927655000 | -3.076050000 | -0.024787000 |
| H       | 1.228931000  | 7.302274000  | -0.435955000 | H       | -7.123876000 | -0.589453000 | 0.076490000  |
| H       | 3.365396000  | 5.995538000  | -0.629777000 | H       | -7.347123000 | 1.895837000  | 0.008251000  |
| H       | 5.506191000  | 4.705080000  | -0.833360000 | H       | -6.130491000 | 4.077853000  | -0.131279000 |
| H       | 6.558780000  | 2.435249000  | -0.819521000 | H       | -4.056423000 | 5.531852000  | -0.304249000 |
| H       | 6.529143000  | -0.103587000 | -0.672191000 | H       | -1.986224000 | 6.965644000  | -0.542287000 |
| H       | 6.472977000  | -2.616103000 | -0.725424000 | B       | 0.401475000  | 1.442333000  | 0.455581000  |
| P       | 0.575687000  | -1.262982000 | 1.064071000  | P       | 1.418341000  | 0.126829000  | 1.347909000  |
| N       | 3.927071000  | 0.321213000  | 2.828811000  | N       | 3.996423000  | -0.160977000 | 3.988071000  |
| N       | 5.011242000  | 0.125437000  | 2.843992000  | N       | 3.407458000  | 0.066674000  | 4.876443000  |
| N2-SBBN |              |              |              | N2-SNBN |              |              |              |
| N       | -3.168885000 | -4.234909000 | -0.279086000 | N       | 1.403111000  | -4.938259000 | -0.337670000 |
| B       | -4.598973000 | -4.441913000 | -0.250900000 | B       | 0.729022000  | -6.213183000 | -0.411070000 |
| B       | -2.291948000 | -5.357315000 | -0.438700000 | B       | 2.831493000  | -4.864154000 | -0.484166000 |
| B       | -0.003712000 | -6.314548000 | -0.545328000 | B       | 4.908636000  | -3.520874000 | -0.747831000 |
| B       | 1.988179000  | -4.821508000 | -0.290036000 | B       | 4.798265000  | -1.017083000 | -0.619258000 |
| B       | -0.308004000 | -3.835488000 | -0.283592000 | B       | 2.744759000  | -2.371385000 | -0.222225000 |
| B       | -2.621802000 | -2.898404000 | -0.139744000 | B       | 0.634155000  | -3.728240000 | -0.131326000 |
| B       | -4.946483000 | -1.978366000 | 0.016794000  | B       | -1.482945000 | -5.057333000 | -0.162509000 |
| B       | -2.966392000 | -0.449881000 | 0.127107000  | B       | -1.575914000 | -2.562534000 | 0.045335000  |
| B       | -0.627405000 | -1.370896000 | 0.020663000  | B       | 0.523143000  | -1.318886000 | 0.367807000  |
| B       | 1.680718000  | -2.339009000 | -0.027368000 | B       | 2.683662000  | 0.160512000  | -0.011784000 |
| B       | 3.682121000  | -0.882314000 | 0.181188000  | B       | 2.577108000  | 2.668573000  | -0.148981000 |
| B       | -1.019234000 | 1.081893000  | 0.244411000  | B       | -1.656124000 | -0.049823000 | 0.156429000  |
| B       | -3.311629000 | 2.025821000  | 0.034334000  | B       | -3.779164000 | -1.385598000 | 0.060035000  |
| B       | -1.333371000 | 3.525771000  | -0.190022000 | B       | -3.869401000 | 1.110351000  | 0.034693000  |
| B       | 0.979916000  | 2.588432000  | -0.008608000 | B       | -1.746717000 | 2.442701000  | -0.007742000 |
| B       | 3.330079000  | 1.590253000  | -0.023663000 | B       | 0.359332000  | 3.803264000  | -0.108703000 |
| B       | 5.232872000  | 3.013747000  | -0.827267000 | B       | 0.243851000  | 6.299631000  | -0.305346000 |
| B       | 2.935869000  | 3.984234000  | -0.650274000 | B       | -1.861302000 | 4.945443000  | -0.156874000 |
| B       | 0.640717000  | 4.975009000  | -0.663890000 | B       | -3.971654000 | 3.603563000  | -0.076602000 |
| B       | -1.667547000 | 5.956845000  | -0.693404000 | B       | -6.093603000 | 2.269305000  | -0.021514000 |
| N       | 1.397242000  | -6.115786000 | -0.471721000 | N       | 5.519752000  | -2.244789000 | -0.824925000 |
| N       | -0.870115000 | -5.166575000 | -0.436990000 | N       | 3.494954000  | -3.591574000 | -0.462870000 |
| N       | -5.450336000 | -3.319123000 | -0.095774000 | N       | -0.686459000 | -6.245479000 | -0.306166000 |
| N       | -3.509764000 | -1.778520000 | 0.013633000  | N       | -0.804748000 | -3.779518000 | -0.061225000 |
| N       | -1.183884000 | -2.692931000 | -0.160453000 | N       | 1.316905000  | -2.458886000 | 0.029516000  |
| N       | 1.122746000  | -3.654683000 | -0.225020000 | N       | 3.383339000  | -1.084637000 | -0.296168000 |
| N       | 3.098953000  | -2.199232000 | 0.131636000  | N       | 3.327617000  | 1.443238000  | -0.201748000 |
| N       | 0.821194000  | -1.164597000 | 0.032579000  | N       | -0.897000000 | -1.288342000 | 0.207805000  |
| N       | -1.532002000 | -0.261148000 | 0.211387000  | N       | -3.015499000 | -2.609491000 | 0.018960000  |
| N       | -3.851231000 | 0.692299000  | 0.127253000  | N       | -3.099343000 | -0.111130000 | 0.093324000  |
| N       | -1.883111000 | 2.216379000  | 0.035328000  | N       | 1.145254000  | 2.598848000  | 0.009175000  |
| N       | 2.876157000  | 0.278497000  | 0.422226000  | N       | 1.024978000  | 5.088157000  | -0.242603000 |
| N       | 4.727805000  | 1.728718000  | -0.404579000 | N       | -1.082391000 | 3.726044000  | -0.082094000 |
| N       | 2.408842000  | 2.705307000  | -0.216230000 | N       | -3.192971000 | 2.381690000  | -0.018525000 |
| N       | 0.092914000  | 3.681581000  | -0.310771000 | N       | -5.321266000 | 1.050229000  | 0.023825000  |
| N       | -2.219106000 | 4.660597000  | -0.377915000 | N       | -5.406846000 | 3.508960000  | -0.068962000 |
| N       | -0.262725000 | 6.079599000  | -0.846885000 | N       | -3.288978000 | 4.857347000  | -0.139351000 |
| N       | 2.051057000  | 5.095839000  | -0.819450000 | N       | -1.170877000 | 6.203178000  | -0.249171000 |

|   |              |              |              |   |              |              |              |
|---|--------------|--------------|--------------|---|--------------|--------------|--------------|
| N | 4.342437000  | 4.107027000  | -0.907150000 | B | 4.738544000  | 1.490158000  | -0.518772000 |
| B | 3.974431000  | -3.346792000 | -0.013336000 | B | 4.661173000  | 3.998146000  | -0.541170000 |
| B | 5.973094000  | -1.841667000 | -0.125890000 | B | 2.458645000  | 5.155879000  | -0.333002000 |
| B | 5.621757000  | 0.615687000  | -0.321227000 | N | 5.444868000  | 0.256760000  | -0.690990000 |
| N | 3.397185000  | -4.642109000 | -0.173033000 | N | 5.373730000  | 2.774062000  | -0.646132000 |
| N | 5.394803000  | -3.134713000 | -0.036725000 | N | 3.237636000  | 3.951442000  | -0.312203000 |
| N | 5.102015000  | -0.694012000 | -0.064894000 | B | -3.695702000 | -3.887757000 | -0.046871000 |
| B | -5.287072000 | 0.498587000  | 0.118470000  | B | -5.991421000 | -0.218931000 | 0.042364000  |
| B | -3.642086000 | 4.484273000  | -0.283374000 | N | -2.912549000 | -5.083511000 | -0.121685000 |
| N | -5.801892000 | -0.837013000 | 0.118133000  | N | -5.229870000 | -1.437303000 | 0.046753000  |
| N | -4.194043000 | 3.172239000  | -0.079919000 | B | -5.907951000 | -2.711156000 | 0.008759000  |
| B | -5.624094000 | 2.980868000  | -0.031719000 | N | -5.132618000 | -3.899719000 | -0.036086000 |
| N | -6.134106000 | 1.659977000  | 0.086499000  | N | -0.971268000 | 1.219393000  | 0.105794000  |
| N | 0.375810000  | 1.340597000  | 0.452511000  | H | 0.776473000  | 7.367809000  | -0.406579000 |
| H | 6.380448000  | 3.154531000  | -1.129598000 | H | 2.999907000  | 6.218064000  | -0.446332000 |
| H | 6.788611000  | 0.768403000  | -0.541248000 | H | 5.229130000  | 5.046090000  | -0.660695000 |
| H | 7.153934000  | -1.704244000 | -0.268913000 | H | 6.364994000  | 2.820341000  | -0.832893000 |
| H | 6.010730000  | -3.931608000 | -0.112377000 | H | 6.431590000  | 0.286516000  | -0.904994000 |
| H | 4.003916000  | -5.444486000 | -0.263778000 | H | 6.507112000  | -2.206946000 | -1.033342000 |
| H | 1.991825000  | -6.929579000 | -0.529691000 | H | 5.547211000  | -4.518009000 | -0.926607000 |
| H | -0.455979000 | -7.414292000 | -0.684489000 | H | 3.463577000  | -5.867486000 | -0.646571000 |
| H | -2.746255000 | -6.457666000 | -0.564949000 | H | 1.349377000  | -7.226358000 | -0.560481000 |
| H | -5.057218000 | -5.542856000 | -0.360037000 | H | -1.141660000 | -7.144633000 | -0.369477000 |
| H | -6.446916000 | -3.481037000 | -0.087773000 | H | -3.386110000 | -5.973662000 | -0.184415000 |
| H | -6.802529000 | -0.974902000 | 0.107247000  | H | -5.623798000 | -4.781337000 | -0.070138000 |
| H | -7.137134000 | 1.543707000  | 0.094749000  | H | -7.104168000 | -2.767606000 | 0.009587000  |
| H | -6.367346000 | 3.916739000  | -0.108252000 | H | -7.187706000 | -0.263957000 | 0.043643000  |
| H | -4.368211000 | 5.427540000  | -0.411517000 | H | -7.290734000 | 2.235308000  | -0.021595000 |
| H | -2.379927000 | 6.906674000  | -0.852910000 | H | -5.959248000 | 4.353515000  | -0.102915000 |
| H | 0.106115000  | 6.989739000  | -1.081400000 | H | -3.831511000 | 5.708067000  | -0.187221000 |
| H | 2.434440000  | 5.989287000  | -1.094366000 | H | -1.703705000 | 7.059462000  | -0.298186000 |
| H | 4.716477000  | 4.996596000  | -1.204831000 | B | 0.474050000  | 1.335248000  | 0.213610000  |
| S | 1.328169000  | 0.243039000  | 1.259233000  | S | 1.342946000  | 0.070796000  | 1.380353000  |
| N | 1.941914000  | 1.947141000  | 2.744231000  | N | 4.963207000  | 0.140573000  | 2.672767000  |
| N | 1.192173000  | 2.112731000  | 3.570222000  | N | 4.634821000  | -0.906867000 | 2.768818000  |

Table S6. Cartesian coordinates of important intermediates of nitrogen reduction catalyzed by Si<sub>B</sub>BN calculated at the  $\omega$ B97X-D/6-31G(d) level of theory.

| <b>HN<sub>2</sub>-Si<sub>B</sub>BN</b> |              |              |              | <b>H<sub>2</sub>N<sub>2</sub>-Si<sub>B</sub>BN</b> |              |              |              |
|----------------------------------------|--------------|--------------|--------------|----------------------------------------------------|--------------|--------------|--------------|
| N                                      | 4.238133000  | 3.187335000  | -0.174423000 | N                                                  | -3.925149000 | -3.596481000 | -0.174620000 |
| B                                      | 5.664779000  | 2.967898000  | -0.200625000 | B                                                  | -5.366853000 | -3.527679000 | -0.187634000 |
| B                                      | 3.707224000  | 4.520031000  | -0.275536000 | B                                                  | -3.258029000 | -4.863830000 | -0.294827000 |
| B                                      | 1.760532000  | 6.079482000  | -0.423232000 | B                                                  | -1.159170000 | -6.207557000 | -0.464722000 |
| B                                      | -0.578977000 | 5.185351000  | -0.305568000 | B                                                  | 1.072303000  | -5.071088000 | -0.346973000 |
| B                                      | 1.376646000  | 3.620578000  | -0.116498000 | B                                                  | -1.034068000 | -3.723846000 | -0.138376000 |
| B                                      | 3.338391000  | 2.054704000  | -0.057558000 | B                                                  | -3.147124000 | -2.375794000 | -0.050555000 |
| B                                      | 5.282458000  | 0.489888000  | -0.070163000 | B                                                  | -5.245635000 | -1.025189000 | -0.022865000 |
| B                                      | 2.948230000  | -0.425529000 | 0.069505000  | B                                                  | -3.017735000 | 0.128850000  | 0.099149000  |
| B                                      | 1.025534000  | 1.167528000  | 0.221189000  | B                                                  | -0.935870000 | -1.250427000 | 0.217275000  |
| B                                      | -0.956062000 | 2.751168000  | 0.108588000  | B                                                  | 1.192831000  | -2.608376000 | 0.079213000  |
| B                                      | -3.358482000 | 1.810753000  | -0.014527000 | B                                                  | 3.483384000  | -1.425557000 | -0.063633000 |
| B                                      | 0.644219000  | -1.383979000 | 0.210456000  | B                                                  | -0.820670000 | 1.317926000  | 0.215827000  |
| B                                      | 2.592164000  | -2.908676000 | -0.100095000 | B                                                  | -2.924598000 | 2.634732000  | -0.049541000 |
| B                                      | 0.256033000  | -3.827994000 | -0.158878000 | B                                                  | -0.700806000 | 3.790175000  | -0.143546000 |
| B                                      | -1.717298000 | -2.312016000 | 0.091171000  | B                                                  | 1.419238000  | 2.481615000  | 0.066298000  |
| B                                      | -3.735490000 | -0.699956000 | -0.023201000 | B                                                  | 3.594421000  | 1.102530000  | -0.077004000 |

|    |              |              |              |    |              |              |              |
|----|--------------|--------------|--------------|----|--------------|--------------|--------------|
| B  | -5.997693000 | -1.614270000 | -0.559355000 | B  | 5.741931000  | 2.249600000  | -0.655881000 |
| B  | -4.033063000 | -3.166395000 | -0.282928000 | B  | 3.628199000  | 3.582935000  | -0.345416000 |
| B  | -2.075115000 | -4.745969000 | -0.344606000 | B  | 1.515552000  | 4.944556000  | -0.367173000 |
| B  | -0.102331000 | -6.285103000 | -0.506557000 | B  | -0.606632000 | 6.274477000  | -0.477544000 |
| N  | 0.352965000  | 6.270720000  | -0.448028000 | N  | 0.261065000  | -6.249114000 | -0.493264000 |
| N  | 2.286359000  | 4.741982000  | -0.267442000 | N  | -1.821475000 | -4.935500000 | -0.294596000 |
| N  | 6.149759000  | 1.635283000  | -0.138454000 | N  | -5.989343000 | -2.255218000 | -0.100365000 |
| N  | 3.850414000  | 0.705563000  | -0.002247000 | N  | -3.799374000 | -1.090421000 | 0.025353000  |
| N  | 1.915486000  | 2.279239000  | 0.001639000  | N  | -1.708752000 | -2.450082000 | -0.005323000 |
| N  | -0.052031000 | 3.851257000  | -0.115438000 | N  | 0.411417000  | -3.801652000 | -0.146944000 |
| N  | -2.405547000 | 2.917144000  | -0.003397000 | N  | 2.655278000  | -2.627650000 | -0.039684000 |
| N  | -0.370016000 | 1.468381000  | 0.412341000  | N  | 0.483815000  | -1.398603000 | 0.393771000  |
| N  | 1.517673000  | -0.212012000 | 0.224384000  | N  | -1.574259000 | 0.064830000  | 0.231059000  |
| N  | 3.477636000  | -1.771582000 | -0.026081000 | N  | -3.688357000 | 1.412271000  | 0.026465000  |
| N  | 1.165442000  | -2.706890000 | -0.025479000 | N  | -1.485070000 | 2.581182000  | -0.005684000 |
| N  | -2.941367000 | 0.462195000  | 0.278827000  | N  | 2.938443000  | -0.133109000 | 0.260842000  |
| N  | -5.127650000 | -0.479883000 | -0.362155000 | N  | 5.000987000  | 1.030146000  | -0.437989000 |
| N  | -3.151048000 | -2.041155000 | -0.011323000 | N  | 2.876661000  | 2.372525000  | -0.060008000 |
| N  | -1.178006000 | -3.628130000 | -0.143955000 | N  | 0.745679000  | 3.739358000  | -0.158507000 |
| N  | 0.794261000  | -5.163971000 | -0.338239000 | N  | -1.378131000 | 5.066537000  | -0.300130000 |
| N  | -1.504538000 | -6.054836000 | -0.509865000 | N  | 0.811344000  | 6.189729000  | -0.512612000 |
| N  | -3.482620000 | -4.487850000 | -0.371542000 | N  | 2.942817000  | 4.839120000  | -0.422886000 |
| N  | -5.437175000 | -2.916934000 | -0.480477000 | N  | 5.049721000  | 3.484844000  | -0.566105000 |
| B  | -2.915414000 | 4.253325000  | -0.266759000 | B  | 3.297409000  | -3.901536000 | -0.316839000 |
| B  | -5.250843000 | 3.351640000  | -0.547488000 | B  | 5.521664000  | -2.763025000 | -0.629828000 |
| B  | -5.628251000 | 0.869261000  | -0.480605000 | B  | 5.637592000  | -0.256681000 | -0.571315000 |
| N  | -1.999813000 | 5.354164000  | -0.345925000 | N  | 2.503717000  | -5.092546000 | -0.392533000 |
| N  | -4.330990000 | 4.429932000  | -0.467107000 | N  | 4.722812000  | -3.931542000 | -0.531699000 |
| N  | -4.754094000 | 2.009643000  | -0.354163000 | N  | 4.890471000  | -1.481297000 | -0.425022000 |
| B  | 4.910003000  | -1.984888000 | -0.100790000 | B  | -5.134742000 | 1.475351000  | -0.021888000 |
| B  | 2.218168000  | -5.368260000 | -0.368792000 | B  | -2.815214000 | 5.122403000  | -0.298474000 |
| N  | 5.780931000  | -0.851002000 | -0.077387000 | N  | -5.882752000 | 0.255715000  | -0.002387000 |
| N  | 3.117619000  | -4.253061000 | -0.251119000 | N  | -3.591597000 | 3.919232000  | -0.174516000 |
| B  | 4.545974000  | -4.461759000 | -0.295726000 | B  | -5.033763000 | 3.978349000  | -0.188815000 |
| N  | 5.401306000  | -3.333059000 | -0.206758000 | N  | -5.766654000 | 2.766163000  | -0.099537000 |
| Si | -1.398478000 | 0.230922000  | 0.947550000  | Si | 1.378105000  | -0.068437000 | 0.979490000  |
| N  | -0.779207000 | -1.264429000 | 0.417103000  | N  | 0.608087000  | 1.339140000  | 0.387515000  |
| H  | -7.163434000 | -1.463744000 | -0.787524000 | H  | 6.913195000  | 2.221674000  | -0.905799000 |
| H  | -6.789639000 | 1.044082000  | -0.713385000 | H  | 6.807052000  | -0.310086000 | -0.825209000 |
| H  | -6.409299000 | 3.552520000  | -0.774638000 | H  | 6.691385000  | -2.841997000 | -0.876110000 |
| H  | -4.690831000 | 5.360475000  | -0.624207000 | H  | 5.172883000  | -4.819695000 | -0.700940000 |
| H  | -2.373870000 | 6.278585000  | -0.508444000 | H  | 2.969954000  | -5.971375000 | -0.568970000 |
| H  | 0.009068000  | 7.212947000  | -0.565010000 | H  | 0.702133000  | -7.148381000 | -0.620963000 |
| H  | 2.500653000  | 7.014151000  | -0.536604000 | H  | -1.794031000 | -7.216135000 | -0.586844000 |
| H  | 4.454868000  | 5.449807000  | -0.374517000 | H  | -3.901857000 | -5.867826000 | -0.403453000 |
| H  | 6.426644000  | 3.888696000  | -0.276917000 | H  | -6.026547000 | -4.523970000 | -0.274087000 |
| H  | 7.149701000  | 1.497796000  | -0.170263000 | H  | -6.998396000 | -2.223131000 | -0.122164000 |
| H  | 6.778535000  | -1.000362000 | -0.132707000 | H  | -6.891150000 | 0.300377000  | -0.042265000 |
| H  | 6.397277000  | -3.494377000 | -0.249902000 | H  | -6.774554000 | 2.823293000  | -0.122745000 |
| H  | 5.001854000  | -5.563158000 | -0.410825000 | H  | -5.603043000 | 5.028501000  | -0.280065000 |
| H  | 2.657875000  | -6.473740000 | -0.501780000 | H  | -3.368847000 | 6.178448000  | -0.410994000 |
| H  | 0.329596000  | -7.392839000 | -0.649042000 | H  | -1.151484000 | 7.334198000  | -0.601980000 |
| H  | -2.110856000 | -6.852263000 | -0.637734000 | H  | 1.329767000  | 7.045894000  | -0.646354000 |
| H  | -4.113356000 | -5.258324000 | -0.543621000 | H  | 3.483677000  | 5.672646000  | -0.605972000 |
| H  | -6.055284000 | -3.698926000 | -0.643600000 | H  | 5.575845000  | 4.328414000  | -0.744001000 |
| N  | -1.518812000 | 0.291868000  | 2.740218000  | N  | 1.468437000  | -0.108228000 | 2.715500000  |
| N  | -1.185238000 | -0.660238000 | 3.465053000  | N  | 2.644805000  | 0.161349000  | 3.274038000  |
| H  | -0.836327000 | -1.476002000 | 2.897981000  | H  | 3.507409000  | 0.053227000  | 2.742500000  |



|    |              |                                                    |              |    |                                          |              |              |
|----|--------------|----------------------------------------------------|--------------|----|------------------------------------------|--------------|--------------|
|    |              |                                                    |              | H  | 2.712553000                              | -0.015394000 | 4.268046000  |
|    |              | <b>H<sub>3</sub>N<sub>2</sub>-Si<sub>B</sub>BN</b> |              |    | <b>H<sub>3</sub>NHN-Si<sub>B</sub>BN</b> |              |              |
| N  | 4.426419000  | 2.990608000                                        | -0.142313000 | N  | 2.138367000                              | 4.859508000  | -0.239838000 |
| B  | 5.841317000  | 2.708936000                                        | -0.144212000 | B  | 3.478211000                              | 5.397601000  | -0.240812000 |
| B  | 3.953168000  | 4.343149000                                        | -0.258614000 | B  | 1.007300000                              | 5.729851000  | -0.405436000 |
| B  | 2.075155000  | 5.980031000                                        | -0.445701000 | B  | -1.457715000                             | 6.072960000  | -0.621432000 |
| B  | -0.299362000 | 5.179577000                                        | -0.353031000 | B  | -3.017608000                             | 4.116836000  | -0.467481000 |
| B  | 1.584220000  | 3.541093000                                        | -0.125969000 | B  | -0.542616000                             | 3.771956000  | -0.222674000 |
| B  | 3.474426000  | 1.897496000                                        | -0.033063000 | B  | 1.937738000                              | 3.429144000  | -0.082183000 |
| B  | 5.348828000  | 0.250644000                                        | -0.006314000 | B  | 4.406005000                              | 3.077730000  | 0.009366000  |
| B  | 2.972587000  | -0.560545000                                       | 0.096512000  | B  | 2.859510000                              | 1.101246000  | 0.135802000  |
| B  | 1.118917000  | 1.110475000                                        | 0.223452000  | B  | 0.392901000                              | 1.489305000  | 0.195984000  |
| B  | -0.781758000 | 2.760821000                                        | 0.084559000  | B  | -2.106283000                             | 1.836314000  | 0.009122000  |
| B  | -3.218795000 | 1.924225000                                        | -0.079951000 | B  | -3.685651000                             | -0.199670000 | -0.124810000 |
| B  | 0.617976000  | -1.407102000                                       | 0.198451000  | B  | 1.356119000                              | -0.896751000 | 0.247325000  |
| B  | 2.510020000  | -3.021999000                                       | -0.074066000 | B  | 3.823264000                              | -1.215996000 | 0.040317000  |
| B  | 0.143547000  | -3.836093000                                       | -0.174652000 | B  | 2.286659000                              | -3.193801000 | -0.086005000 |
| B  | -1.755240000 | -2.225575000                                       | 0.046601000  | B  | -0.189183000                             | -2.888253000 | 0.068418000  |
| B  | -3.703993000 | -0.549417000                                       | -0.100038000 | B  | -2.734746000                             | -2.539837000 | -0.119659000 |
| B  | -6.001857000 | -1.371855000                                       | -0.669577000 | B  | -4.207775000                             | -4.484295000 | -0.682442000 |
| B  | -4.110776000 | -3.002207000                                       | -0.339832000 | B  | -1.730254000                             | -4.811483000 | -0.363804000 |
| B  | -2.217907000 | -4.653431000                                       | -0.384062000 | B  | 0.758433000                              | -5.166881000 | -0.345154000 |
| B  | -0.314972000 | -6.278809000                                       | -0.523950000 | B  | 3.244221000                              | -5.491647000 | -0.389368000 |
| N  | 0.676715000  | 6.227705000                                        | -0.492244000 | N  | -2.767756000                             | 5.520564000  | -0.648215000 |
| N  | 2.543366000  | 4.625153000                                        | -0.272311000 | N  | -0.329396000                             | 5.196910000  | -0.411657000 |
| N  | 6.267830000  | 1.357068000                                        | -0.066126000 | N  | 4.571261000                              | 4.503470000  | -0.102483000 |
| N  | 3.928982000  | 0.528728000                                        | 0.036300000  | N  | 3.063205000                              | 2.534517000  | 0.038235000  |
| N  | 2.064556000  | 2.182737000                                        | 0.004644000  | N  | 0.597933000                              | 2.898226000  | -0.049637000 |
| N  | 0.166606000  | 3.829418000                                        | -0.144039000 | N  | -1.890995000                             | 3.242391000  | -0.237853000 |
| N  | -2.225617000 | 2.993209000                                        | -0.057794000 | N  | -3.444007000                             | 1.243398000  | -0.108572000 |
| N  | -0.257220000 | 1.465329000                                        | 0.404604000  | N  | -0.964556000                             | 1.037789000  | 0.353905000  |
| N  | 1.556185000  | -0.285747000                                       | 0.225237000  | N  | 1.518179000                              | 0.558889000  | 0.247474000  |
| N  | 3.447713000  | -1.929195000                                       | 0.013326000  | N  | 4.005871000                              | 0.214681000  | 0.105312000  |
| N  | 1.094212000  | -2.757054000                                       | -0.028661000 | N  | 2.492165000                              | -1.767232000 | 0.053367000  |
| N  | -2.875271000 | 0.564614000                                        | 0.245806000  | N  | -2.645154000                             | -1.137832000 | 0.178751000  |
| N  | -5.088218000 | -0.276301000                                       | -0.463556000 | N  | -4.044851000                             | -3.064741000 | -0.474160000 |
| N  | -3.190593000 | -1.916945000                                       | -0.051595000 | N  | -1.555607000                             | -3.397630000 | -0.082963000 |
| N  | -1.280282000 | -3.574688000                                       | -0.179979000 | N  | 0.951957000                              | -3.750305000 | -0.134650000 |
| N  | 0.624704000  | -5.198948000                                       | -0.342368000 | N  | 3.438414000                              | -4.071798000 | -0.209061000 |
| N  | -1.706067000 | -5.987812000                                       | -0.543578000 | N  | 1.921193000                              | -6.004812000 | -0.463739000 |
| N  | -3.617586000 | -4.345379000                                       | -0.416816000 | N  | -0.581625000                             | -5.666629000 | -0.426500000 |
| N  | -5.503912000 | -2.697081000                                       | -0.556135000 | N  | -3.061768000                             | -5.315850000 | -0.594669000 |
| B  | -2.670106000 | 4.344972000                                        | -0.343214000 | B  | -4.557422000                             | 2.129038000  | -0.398135000 |
| B  | -5.035848000 | 3.548687000                                        | -0.669790000 | B  | -6.108408000                             | 0.160377000  | -0.651860000 |
| B  | -5.523564000 | 1.092232000                                        | -0.605067000 | B  | -5.163215000                             | -2.166421000 | -0.591867000 |
| N  | -1.711908000 | 5.409087000                                        | -0.414776000 | N  | -4.330276000                             | 3.540417000  | -0.500548000 |
| N  | -4.074820000 | 4.586195000                                        | -0.571296000 | N  | -5.870038000                             | 1.558598000  | -0.575946000 |
| N  | -4.602854000 | 2.188611000                                        | -0.454500000 | N  | -4.998198000                             | -0.737556000 | -0.450214000 |
| B  | 4.868417000  | -2.204855000                                       | -0.033459000 | B  | 5.347500000                              | 0.760229000  | 0.085014000  |
| B  | 2.037949000  | -5.465291000                                       | -0.345700000 | B  | 4.767384000                              | -3.524303000 | -0.164352000 |
| N  | 5.789723000  | -1.111076000                                       | 0.001971000  | N  | 5.518232000                              | 2.181042000  | 0.080663000  |
| N  | 2.981516000  | -4.391035000                                       | -0.211558000 | N  | 4.968371000                              | -2.106096000 | -0.042819000 |
| B  | 4.398928000  | -4.662803000                                       | -0.227538000 | B  | 6.303554000                              | -1.558722000 | -0.017553000 |
| N  | 5.303233000  | -3.574513000                                       | -0.124956000 | N  | 6.461838000                              | -0.150120000 | 0.057397000  |
| Si | -1.342780000 | 0.297936000                                        | 1.025604000  | Si | -1.229850000                             | -0.545049000 | 0.952156000  |
| N  | -0.796527000 | -1.212637000                                       | 0.363048000  | N  | 0.064799000                              | -1.512562000 | 0.397761000  |
| H  | -7.156367000 | -1.174425000                                       | -0.923159000 | H  | -5.284181000                             | -4.951461000 | -0.924836000 |
| H  | -6.672318000 | 1.316399000                                        | -0.863208000 | H  | -6.252045000                             | -2.607559000 | -0.826926000 |

|   |              |                                         |              |   |              |                                                     |              |
|---|--------------|-----------------------------------------|--------------|---|--------------|-----------------------------------------------------|--------------|
| H | -6.180715000 | 3.796166000                             | -0.924445000 | H | -7.208359000 | -0.259144000                                        | -0.873638000 |
| H | -4.386468000 | 5.530381000                             | -0.748349000 | H | -6.651202000 | 2.174254000                                         | -0.752036000 |
| H | -2.044834000 | 6.345414000                             | -0.596956000 | H | -5.118156000 | 4.142536000                                         | -0.694756000 |
| H | 0.371770000  | 7.181336000                             | -0.623278000 | H | -3.539835000 | 6.152629000                                         | -0.803317000 |
| H | 2.853589000  | 6.884568000                             | -0.555333000 | H | -1.295957000 | 7.249676000                                         | -0.777217000 |
| H | 4.741127000  | 5.240775000                             | -0.351594000 | H | 1.178004000  | 6.906698000                                         | -0.547483000 |
| H | 6.644580000  | 3.595548000                             | -0.213381000 | H | 3.665726000  | 6.574633000                                         | -0.361643000 |
| H | 7.261069000  | 1.175810000                             | -0.081311000 | H | 5.502513000  | 4.893808000                                         | -0.115246000 |
| H | 6.780473000  | -1.304326000                            | -0.036227000 | H | 6.454211000  | 2.560362000                                         | 0.056902000  |
| H | 6.291641000  | -3.779590000                            | -0.149103000 | H | 7.402221000  | 0.217825000                                         | 0.060418000  |
| H | 4.807405000  | -5.784617000                            | -0.330316000 | H | 7.261173000  | -2.277167000                                        | -0.063338000 |
| H | 2.430691000  | -6.590294000                            | -0.468528000 | H | 5.713551000  | -4.254982000                                        | -0.237024000 |
| H | 0.068147000  | -7.405804000                            | -0.661346000 | H | 4.183521000  | -6.229631000                                        | -0.481206000 |
| H | -2.346128000 | -6.756632000                            | -0.680814000 | H | 1.809923000  | -6.999647000                                        | -0.596038000 |
| H | -4.273744000 | -5.089886000                            | -0.606754000 | H | -0.722682000 | -6.651102000                                        | -0.604640000 |
| H | -6.148473000 | -3.453756000                            | -0.735363000 | H | -3.188134000 | -6.303296000                                        | -0.765025000 |
| N | -1.481506000 | 0.427872000                             | 2.706621000  | N | -1.321523000 | -0.496750000                                        | 2.695149000  |
| N | -2.702483000 | -0.150419000                            | 3.191408000  | N | -4.301118000 | 0.315177000                                         | 2.984120000  |
| H | -3.530642000 | 0.064627000                             | 2.607799000  | H | -4.866729000 | -0.348802000                                        | 2.460978000  |
| H | -2.890258000 | 0.228127000                             | 4.122974000  | H | -2.284657000 | -0.254873000                                        | 2.995292000  |
| H | -2.676286000 | -1.175228000                            | 3.292816000  | H | -4.363468000 | 1.197429000                                         | 2.483112000  |
|   |              |                                         |              | H | -4.751584000 | 0.446223000                                         | 3.885608000  |
|   |              | <b>HHN<sub>2</sub>-Si<sub>6</sub>BN</b> |              |   |              | <b>H<sub>2</sub>HN<sub>2</sub>-Si<sub>6</sub>BN</b> |              |
| N | 4.062372000  | 3.404421000                             | -0.176213000 | N | 2.663105000  | 4.573105000                                         | -0.215270000 |
| B | 5.498565000  | 3.260324000                             | -0.205097000 | B | 4.058924000  | 4.937730000                                         | -0.233114000 |
| B | 3.463674000  | 4.707505000                             | -0.274287000 | B | 1.648330000  | 5.583713000                                         | -0.344207000 |
| B | 1.439244000  | 6.162286000                             | -0.424279000 | B | -0.754757000 | 6.239735000                                         | -0.525617000 |
| B | -0.849237000 | 5.145110000                             | -0.313353000 | B | -2.545891000 | 4.489132000                                         | -0.407487000 |
| B | 1.183461000  | 3.685970000                             | -0.119243000 | B | -0.134950000 | 3.833282000                                         | -0.180509000 |
| B | 3.222164000  | 2.225627000                             | -0.062982000 | B | 2.283778000  | 3.176593000                                         | -0.083258000 |
| B | 5.247436000  | 0.765636000                             | -0.084843000 | B | 4.690823000  | 2.515026000                                         | -0.051832000 |
| B | 2.964140000  | -0.270121000                            | 0.050387000  | B | 2.909545000  | 0.748550000                                         | 0.080593000  |
| B | 0.955258000  | 1.217114000                             | 0.213172000  | B | 0.506118000  | 1.443435000                                         | 0.190105000  |
| B | -1.099796000 | 2.690240000                             | 0.097140000  | B | -1.928978000 | 2.105266000                                         | 0.033235000  |
| B | -3.448947000 | 1.635047000                             | -0.033418000 | B | -3.749411000 | 0.294597000                                         | -0.081358000 |
| B | 0.713994000  | -1.345148000                            | 0.182979000  | B | 1.174566000  | -1.044724000                                        | 0.217725000  |
| B | 2.737179000  | -2.768014000                            | -0.126252000 | B | 3.574684000  | -1.671818000                                        | -0.055212000 |
| B | 0.451481000  | -3.806038000                            | -0.178536000 | B | 1.799047000  | -3.441559000                                        | -0.136112000 |
| B | -1.594396000 | -2.392165000                            | 0.084771000  | B | -0.614531000 | -2.828182000                                        | 0.089485000  |
| B | -3.695495000 | -0.887456000                            | -0.019554000 | B | -3.100109000 | -2.146646000                                        | -0.051304000 |
| B | -5.908039000 | -1.920261000                            | -0.557430000 | B | -4.811047000 | -3.893017000                                        | -0.596304000 |
| B | -3.864682000 | -3.365334000                            | -0.279169000 | B | -2.396056000 | -4.534947000                                        | -0.297701000 |
| B | -1.829276000 | -4.842299000                            | -0.347864000 | B | 0.027511000  | -5.207951000                                        | -0.338691000 |
| B | 0.218576000  | -6.279502000                            | -0.515433000 | B | 2.450789000  | -5.841983000                                        | -0.458227000 |
| N | 0.023508000  | 6.278767000                             | -0.452071000 | N | -2.121774000 | 5.856084000                                         | -0.558230000 |
| N | 2.033157000  | 4.854690000                             | -0.266776000 | N | 0.256923000  | 5.224316000                                         | -0.343088000 |
| N | 6.053872000  | 1.955432000                             | -0.148856000 | N | 5.033690000  | 3.910083000                                         | -0.138205000 |
| N | 3.806548000  | 0.906497000                             | -0.015110000 | N | 3.291432000  | 2.144926000                                         | -0.001026000 |
| N | 1.788980000  | 2.375166000                             | -0.001077000 | N | 0.889733000  | 2.818357000                                         | -0.037214000 |
| N | -0.255509000 | 3.840029000                             | -0.121707000 | N | -1.535756000 | 3.478209000                                         | -0.193294000 |
| N | -2.556998000 | 2.790589000                             | -0.012704000 | N | -3.324068000 | 1.689264000                                         | -0.099477000 |
| N | -0.456445000 | 1.438476000                             | 0.406073000  | N | -0.893058000 | 1.162698000                                         | 0.354084000  |
| N | 1.525756000  | -0.130931000                            | 0.204301000  | N | 1.513223000  | 0.378199000                                         | 0.217584000  |
| N | 3.562957000  | -1.586567000                            | -0.050350000 | N | 3.935288000  | -0.276129000                                        | 0.014376000  |
| N | 1.302866000  | -2.639713000                            | -0.053474000 | N | 2.186169000  | -2.052352000                                        | -0.005380000 |
| N | -2.965502000 | 0.318443000                             | 0.283115000  | N | -2.832502000 | -0.765812000                                        | 0.239300000  |
| N | -5.097890000 | -0.741404000                            | -0.363172000 | N | -4.465392000 | -2.507589000                                        | -0.398565000 |
| N | -3.042109000 | -2.195378000                            | -0.013082000 | N | -2.037545000 | -3.154162000                                        | -0.023322000 |

|                                                                 |              |              |              |                                                      |              |              |              |
|-----------------------------------------------------------------|--------------|--------------|--------------|------------------------------------------------------|--------------|--------------|--------------|
| N                                                               | -0.990363000 | -3.679590000 | -0.156131000 | N                                                    | 0.404543000  | -3.827179000 | -0.139379000 |
| N                                                               | 1.057478000  | -5.113406000 | -0.356165000 | N                                                    | 2.827216000  | -4.457401000 | -0.289719000 |
| N                                                               | -1.193566000 | -6.121211000 | -0.512485000 | N                                                    | 1.072354000  | -6.185690000 | -0.487129000 |
| N                                                               | -3.248480000 | -4.657121000 | -0.368749000 | N                                                    | -1.366416000 | -5.531836000 | -0.376320000 |
| N                                                               | -5.281606000 | -3.191024000 | -0.472811000 | N                                                    | -3.782229000 | -4.867851000 | -0.505456000 |
| B                                                               | -3.133841000 | 4.097341000  | -0.284249000 | B                                                    | -4.318476000 | 2.707360000  | -0.375531000 |
| B                                                               | -5.416901000 | 3.075187000  | -0.581365000 | B                                                    | -6.100769000 | 0.949883000  | -0.637828000 |
| B                                                               | -5.666745000 | 0.577254000  | -0.498820000 | B                                                    | -5.461171000 | -1.472599000 | -0.536341000 |
| N                                                               | -2.276905000 | 5.243687000  | -0.357698000 | N                                                    | -3.917226000 | 4.082354000  | -0.463105000 |
| N                                                               | -4.555520000 | 4.200536000  | -0.493581000 | N                                                    | -5.688978000 | 2.306815000  | -0.576405000 |
| N                                                               | -4.852534000 | 1.762289000  | -0.379693000 | N                                                    | -5.114065000 | -0.079828000 | -0.419983000 |
| B                                                               | 5.003940000  | -1.725373000 | -0.124401000 | B                                                    | 5.334202000  | 0.096470000  | -0.035618000 |
| B                                                               | 2.489769000  | -5.243940000 | -0.390328000 | B                                                    | 4.215163000  | -4.080320000 | -0.287752000 |
| N                                                               | 5.815070000  | -0.547446000 | -0.098234000 | N                                                    | 5.682738000  | 1.483781000  | -0.024287000 |
| N                                                               | 3.331423000  | -4.083732000 | -0.276245000 | N                                                    | 4.595804000  | -2.698949000 | -0.172535000 |
| B                                                               | 4.768398000  | -4.217908000 | -0.321103000 | B                                                    | 5.989454000  | -2.323280000 | -0.183382000 |
| N                                                               | 5.564537000  | -3.046253000 | -0.232617000 | N                                                    | 6.324415000  | -0.946428000 | -0.103795000 |
| Si                                                              | -1.415340000 | 0.139594000  | 0.965652000  | Si                                                   | -1.330645000 | -0.369064000 | 0.969642000  |
| N                                                               | -0.708410000 | -1.297579000 | 0.395113000  | N                                                    | -0.175255000 | -1.499978000 | 0.417786000  |
| H                                                               | -7.079829000 | -1.829823000 | -0.787451000 | H                                                    | -5.939388000 | -4.218640000 | -0.834248000 |
| H                                                               | -6.834783000 | 0.691602000  | -0.736813000 | H                                                    | -6.595441000 | -1.777646000 | -0.773895000 |
| H                                                               | -6.582503000 | 3.216380000  | -0.817344000 | H                                                    | -7.243484000 | 0.670723000  | -0.867677000 |
| H                                                               | -4.960820000 | 5.110772000  | -0.658661000 | H                                                    | -6.387244000 | 3.015277000  | -0.750262000 |
| H                                                               | -2.695335000 | 6.147595000  | -0.527095000 | H                                                    | -4.624719000 | 4.780873000  | -0.642351000 |
| H                                                               | -0.369803000 | 7.201065000  | -0.571538000 | H                                                    | -2.810796000 | 6.580947000  | -0.697124000 |
| H                                                               | 2.128009000  | 7.135651000  | -0.536686000 | H                                                    | -0.447326000 | 7.390562000  | -0.656000000 |
| H                                                               | 4.160525000  | 5.676306000  | -0.371116000 | H                                                    | 1.965863000  | 6.732565000  | -0.462530000 |
| H                                                               | 6.209602000  | 4.221286000  | -0.279115000 | H                                                    | 4.391949000  | 6.084403000  | -0.331332000 |
| H                                                               | 7.059577000  | 1.870943000  | -0.182326000 | H                                                    | 6.006178000  | 4.180526000  | -0.164368000 |
| H                                                               | 6.819050000  | -0.644635000 | -0.153708000 | H                                                    | 6.658102000  | 1.743224000  | -0.066224000 |
| H                                                               | 6.567492000  | -3.155885000 | -0.275408000 | H                                                    | 7.303057000  | -0.698584000 | -0.124955000 |
| H                                                               | 5.280574000  | -5.294496000 | -0.435994000 | H                                                    | 6.848062000  | -3.155370000 | -0.259843000 |
| H                                                               | 2.985428000  | -6.325784000 | -0.522908000 | H                                                    | 5.060249000  | -4.923186000 | -0.387725000 |
| H                                                               | 0.705609000  | -7.364676000 | -0.655902000 | H                                                    | 3.287878000  | -6.691039000 | -0.576114000 |
| H                                                               | -1.758791000 | -6.949334000 | -0.633028000 | H                                                    | 0.833255000  | -7.158397000 | -0.615111000 |
| H                                                               | -3.839238000 | -5.459541000 | -0.536404000 | H                                                    | -1.637502000 | -6.489006000 | -0.553050000 |
| H                                                               | -5.857060000 | -4.005336000 | -0.633653000 | H                                                    | -4.035442000 | -5.830800000 | -0.674365000 |
| N                                                               | -1.550570000 | 0.009046000  | 2.706022000  | N                                                    | -1.343794000 | -0.401488000 | 2.688763000  |
| N                                                               | -0.754754000 | -0.693237000 | 3.555523000  | N                                                    | -2.321185000 | 0.441901000  | 3.267823000  |
| H                                                               | -0.186242000 | -1.297458000 | 2.948103000  | H                                                    | -1.908686000 | 0.973681000  | 4.027851000  |
| H                                                               | -2.175621000 | 0.621318000  | 3.217670000  | H                                                    | -1.029230000 | -1.194933000 | 3.236071000  |
|                                                                 |              |              |              | H                                                    | -3.101980000 | -0.098903000 | 3.629730000  |
| <b>H<sub>2</sub>H<sub>2</sub>N<sub>2</sub>-Si<sub>B</sub>BN</b> |              |              |              | <b>H<sub>3</sub>NH<sub>2</sub>N-Si<sub>B</sub>BN</b> |              |              |              |
| N                                                               | 3.255471000  | 4.199680000  | -0.189233000 | N                                                    | 0.350072000  | 5.252162000  | -0.263653000 |
| B                                                               | 4.692143000  | 4.382785000  | -0.219454000 | B                                                    | 1.428224000  | 6.212031000  | -0.276402000 |
| B                                                               | 2.381400000  | 5.334965000  | -0.316025000 | B                                                    | -1.009690000 | 5.690413000  | -0.414648000 |
| B                                                               | 0.081191000  | 6.298321000  | -0.505064000 | B                                                    | -3.446130000 | 5.181366000  | -0.614912000 |
| B                                                               | -1.928191000 | 4.804400000  | -0.399461000 | B                                                    | -4.248668000 | 2.809634000  | -0.483895000 |
| B                                                               | 0.384300000  | 3.838692000  | -0.145733000 | B                                                    | -1.803204000 | 3.321919000  | -0.240992000 |
| B                                                               | 2.708501000  | 2.869897000  | -0.055978000 | B                                                    | 0.645930000  | 3.836621000  | -0.116413000 |
| B                                                               | 5.007638000  | 1.897268000  | -0.044152000 | B                                                    | 3.088897000  | 4.342505000  | -0.056813000 |
| B                                                               | 3.017456000  | 0.377024000  | 0.097760000  | B                                                    | 2.303401000  | 1.959662000  | 0.086901000  |
| B                                                               | 0.733320000  | 1.388103000  | 0.213595000  | B                                                    | -0.153194000 | 1.482688000  | 0.156235000  |
| B                                                               | -1.634046000 | 2.374463000  | 0.054837000  | B                                                    | -2.611026000 | 0.963956000  | -0.036854000 |
| B                                                               | -3.692896000 | 0.802391000  | -0.091846000 | B                                                    | -3.410106000 | -1.477982000 | -0.149608000 |
| B                                                               | 1.069014000  | -1.181238000 | 0.213755000  | B                                                    | 1.567650000  | -0.427177000 | 0.238123000  |
| B                                                               | 3.356061000  | -2.113417000 | -0.045099000 | B                                                    | 3.994259000  | 0.104389000  | -0.021089000 |
| B                                                               | 1.356306000  | -3.642922000 | -0.131729000 | B                                                    | 3.218046000  | -2.280088000 | -0.074239000 |

|    |              |              |              |    |              |              |              |
|----|--------------|--------------|--------------|----|--------------|--------------|--------------|
| B  | -0.967846000 | -2.741845000 | 0.071949000  | B  | 0.786984000  | -2.826639000 | 0.142243000  |
| B  | -3.365679000 | -1.748101000 | -0.060553000 | B  | -1.730702000 | -3.353136000 | -0.047443000 |
| B  | -5.278066000 | -3.244554000 | -0.611485000 | B  | -2.448022000 | -5.691022000 | -0.594769000 |
| B  | -2.959521000 | -4.195983000 | -0.319356000 | B  | -0.016154000 | -5.161931000 | -0.230319000 |
| B  | -0.635213000 | -5.172676000 | -0.352931000 | B  | 2.446639000  | -4.660506000 | -0.242508000 |
| B  | 1.689268000  | -6.102455000 | -0.465873000 | B  | 4.892775000  | -4.123957000 | -0.369761000 |
| N  | -1.326478000 | 6.094235000  | -0.548323000 | N  | -4.491029000 | 4.218245000  | -0.643594000 |
| N  | 0.949885000  | 5.155978000  | -0.310525000 | N  | -2.086836000 | 4.737224000  | -0.415566000 |
| N  | 5.521150000  | 3.234562000  | -0.132008000 | N  | 2.761199000  | 5.740524000  | -0.158577000 |
| N  | 3.564432000  | 1.710379000  | 0.020760000  | N  | 2.009711000  | 3.377267000  | -0.010209000 |
| N  | 1.270271000  | 2.694151000  | 0.002762000  | N  | -0.433966000 | 2.883140000  | -0.080533000 |
| N  | -1.058525000 | 3.664507000  | -0.160563000 | N  | -2.892051000 | 2.367857000  | -0.253276000 |
| N  | -3.066344000 | 2.114173000  | -0.089380000 | N  | -3.673673000 | -0.037554000 | -0.155969000 |
| N  | -0.710097000 | 1.299670000  | 0.397663000  | N  | -1.270273000 | 0.593261000  | 0.302698000  |
| N  | 1.568807000  | 0.189370000  | 0.243540000  | N  | 1.226226000  | 0.997189000  | 0.219979000  |
| N  | 3.886658000  | -0.774226000 | 0.027206000  | N  | 3.682218000  | 1.513371000  | 0.036905000  |
| N  | 1.919862000  | -2.310056000 | 0.008659000  | N  | 2.930228000  | -0.864401000 | 0.033464000  |
| N  | -2.933880000 | -0.393892000 | 0.263128000  | N  | -2.127278000 | -1.996505000 | 0.215621000  |
| N  | -4.754285000 | -1.908030000 | -0.400311000 | N  | -2.773206000 | -4.295954000 | -0.424866000 |
| N  | -2.423508000 | -2.861348000 | -0.029445000 | N  | -0.329110000 | -3.765457000 | 0.014458000  |
| N  | -0.084401000 | -3.844607000 | -0.137829000 | N  | 2.152169000  | -3.256628000 | -0.066504000 |
| N  | 2.237768000  | -4.774418000 | -0.286190000 | N  | 4.596902000  | -2.717460000 | -0.221479000 |
| N  | 0.275477000  | -6.265864000 | -0.500275000 | N  | 3.822846000  | -5.057892000 | -0.379820000 |
| N  | -2.061663000 | -5.304628000 | -0.400168000 | N  | 1.354550000  | -5.584268000 | -0.276375000 |
| N  | -4.375129000 | -4.335500000 | -0.525564000 | N  | -1.094297000 | -6.091976000 | -0.452109000 |
| B  | -3.922720000 | 3.263997000  | -0.391972000 | B  | -5.017136000 | 0.415682000  | -0.462931000 |
| B  | -5.922142000 | 1.749942000  | -0.669892000 | B  | -5.787917000 | -1.960471000 | -0.769831000 |
| B  | -5.605733000 | -0.746503000 | -0.547714000 | B  | -4.120871000 | -3.828362000 | -0.619527000 |
| N  | -3.339245000 | 4.565393000  | -0.474589000 | N  | -5.285952000 | 1.823490000  | -0.538067000 |
| N  | -5.326310000 | 3.034607000  | -0.609454000 | N  | -6.048218000 | -0.564700000 | -0.684971000 |
| N  | -5.077145000 | 0.594042000  | -0.427878000 | N  | -4.447880000 | -2.426292000 | -0.522506000 |
| B  | 5.330127000  | -0.586966000 | -0.034202000 | B  | 4.759447000  | 2.480213000  | -0.015123000 |
| B  | 3.668471000  | -4.582759000 | -0.285075000 | B  | 5.660215000  | -1.750498000 | -0.237595000 |
| N  | 5.850071000  | 0.743314000  | -0.025408000 | N  | 4.439883000  | 3.875111000  | -0.012025000 |
| N  | 4.223520000  | -3.261803000 | -0.165320000 | N  | 5.371002000  | -0.345686000 | -0.134277000 |
| B  | 5.660085000  | -3.072715000 | -0.184998000 | B  | 6.441321000  | 0.621752000  | -0.155545000 |
| N  | 6.167929000  | -1.750488000 | -0.107360000 | N  | 6.114839000  | 2.001219000  | -0.079912000 |
| Si | -1.355440000 | -0.187435000 | 0.767183000  | Si | -0.985827000 | -0.966030000 | 0.986170000  |
| N  | -0.349680000 | -1.464829000 | 0.399785000  | N  | 0.569338000  | -1.437712000 | 0.444058000  |
| H  | -6.435511000 | -3.417894000 | -0.847064000 | H  | -3.297123000 | -6.494686000 | -0.857610000 |
| H  | -6.764860000 | -0.900513000 | -0.788267000 | H  | -4.983757000 | -4.613770000 | -0.891812000 |
| H  | -7.084314000 | 1.615261000  | -0.908337000 | H  | -6.668621000 | -2.726321000 | -1.040185000 |
| H  | -5.924006000 | 3.827139000  | -0.799891000 | H  | -6.987788000 | -0.253050000 | -0.885287000 |
| H  | -3.947378000 | 5.348801000  | -0.670923000 | H  | -6.229438000 | 2.122974000  | -0.740927000 |
| H  | -1.908679000 | 6.905617000  | -0.701625000 | H  | -5.432131000 | 4.550820000  | -0.796633000 |
| H  | 0.539337000  | 7.393692000  | -0.636407000 | H  | -3.692209000 | 6.344772000  | -0.760221000 |
| H  | 2.842004000  | 6.430520000  | -0.435921000 | H  | -1.247011000 | 6.856642000  | -0.548494000 |
| H  | 5.166753000  | 5.474682000  | -0.320849000 | H  | 1.205399000  | 7.383604000  | -0.390302000 |
| H  | 6.520515000  | 3.378728000  | -0.168226000 | H  | 3.505185000  | 6.422920000  | -0.182685000 |
| H  | 6.851091000  | 0.873120000  | -0.076181000 | H  | 5.191440000  | 4.548755000  | -0.055124000 |
| H  | 7.171286000  | -1.635401000 | -0.136822000 | H  | 6.874094000  | 2.666370000  | -0.108290000 |
| H  | 6.397762000  | -4.009124000 | -0.266080000 | H  | 7.583813000  | 0.271223000  | -0.239753000 |
| H  | 4.392434000  | -5.527025000 | -0.388673000 | H  | 6.795607000  | -2.116317000 | -0.344989000 |
| H  | 2.410680000  | -7.046566000 | -0.587185000 | H  | 6.024174000  | -4.499506000 | -0.490019000 |
| H  | -0.080357000 | -7.201225000 | -0.639138000 | H  | 4.052138000  | -6.034744000 | -0.493149000 |
| H  | -2.451005000 | -6.219139000 | -0.585488000 | H  | 1.550403000  | -6.562844000 | -0.433916000 |
| H  | -4.752079000 | -5.256914000 | -0.700429000 | H  | -0.878172000 | -7.067332000 | -0.599880000 |
| N  | -1.478382000 | -0.269759000 | 2.702699000  | N  | -1.088690000 | -1.062812000 | 2.689030000  |

|   |              |                                        |              |   |              |                                        |              |
|---|--------------|----------------------------------------|--------------|---|--------------|----------------------------------------|--------------|
| N | -2.590822000 | 0.500355000                            | 3.181096000  | N | -3.698157000 | 0.509904000                            | 3.072204000  |
| H | -2.706003000 | 0.340645000                            | 4.178915000  | H | -4.313302000 | 0.024384000                            | 2.424911000  |
| H | -1.479318000 | -1.249690000                           | 3.011458000  | H | -1.911944000 | -0.614861000                           | 3.102116000  |
| H | -3.417883000 | 0.161084000                            | 2.695458000  | H | -3.496627000 | 1.410317000                            | 2.644025000  |
| H | -0.628302000 | 0.162948000                            | 3.072281000  | H | -0.248695000 | -0.887192000                           | 3.224802000  |
|   |              |                                        |              | H | -4.232680000 | 0.694278000                            | 3.916707000  |
|   |              | <b>H<sub>2</sub>N-Si<sub>8</sub>BN</b> |              |   |              | <b>H<sub>3</sub>N-Si<sub>8</sub>BN</b> |              |
| N | 3.730346000  | 3.732758000                            | -0.159427000 | N | 4.415398000  | 2.818932000                            | -0.226388000 |
| B | 5.173026000  | 3.717217000                            | -0.199612000 | B | 5.816783000  | 2.482018000                            | -0.290021000 |
| B | 3.017279000  | 4.975878000                            | -0.268220000 | B | 3.997262000  | 4.191713000                            | -0.314970000 |
| B | 0.871251000  | 6.243410000                            | -0.408616000 | B | 2.186936000  | 5.906839000                            | -0.422109000 |
| B | -1.316067000 | 5.026820000                            | -0.264159000 | B | -0.214491000 | 5.204720000                            | -0.256441000 |
| B | 0.838143000  | 3.756350000                            | -0.080179000 | B | 1.603506000  | 3.487642000                            | -0.099954000 |
| B | 2.998040000  | 2.485022000                            | -0.026027000 | B | 3.423377000  | 1.765920000                            | -0.088061000 |
| B | 5.146113000  | 1.212437000                            | -0.042451000 | B | 5.231621000  | 0.045746000                            | -0.149371000 |
| B | 2.963843000  | -0.021744000                           | 0.115982000  | B | 2.829556000  | -0.670482000                           | 0.044968000  |
| B | 0.828621000  | 1.279608000                            | 0.274582000  | B | 1.042881000  | 1.075204000                            | 0.264925000  |
| B | -1.343949000 | 2.559021000                            | 0.164177000  | B | -0.785685000 | 2.803550000                            | 0.182030000  |
| B | -3.587943000 | 1.298744000                            | 0.046447000  | B | -3.242672000 | 2.060817000                            | 0.047090000  |
| B | 0.815449000  | -1.291170000                           | 0.267549000  | B | 0.448886000  | -1.428053000                           | 0.264092000  |
| B | 2.959844000  | -2.529402000                           | -0.049448000 | B | 2.264048000  | -3.112565000                           | -0.106686000 |
| B | 0.777643000  | -3.765574000                           | -0.093551000 | B | -0.134844000 | -3.835208000                           | -0.102193000 |
| B | -1.383215000 | -2.535553000                           | 0.176687000  | B | -1.961216000 | -2.152892000                           | 0.194482000  |
| B | -3.607896000 | -1.228257000                           | 0.067255000  | B | -3.824541000 | -0.388116000                           | 0.059446000  |
| B | -5.720182000 | -2.456841000                           | -0.475365000 | B | -6.167866000 | -1.114659000                           | -0.452411000 |
| B | -3.556806000 | -3.711146000                           | -0.190869000 | B | -4.346016000 | -2.822779000                           | -0.154046000 |
| B | -1.399806000 | -5.000052000                           | -0.257651000 | B | -2.531375000 | -4.555805000                           | -0.233851000 |
| B | 0.766474000  | -6.251579000                           | -0.426814000 | B | -0.701395000 | -6.257913000                           | -0.431937000 |
| N | -0.548987000 | 6.233602000                            | -0.419172000 | N | 0.800802000  | 6.212580000                            | -0.418135000 |
| N | 1.580093000  | 4.995472000                            | -0.245819000 | N | 2.602185000  | 4.531064000                            | -0.272063000 |
| N | 5.843392000  | 2.468432000                            | -0.127199000 | N | 6.191460000  | 1.113990000                            | -0.238691000 |
| N | 3.699287000  | 1.224746000                            | 0.035063000  | N | 3.825968000  | 0.379907000                            | -0.044222000 |
| N | 1.558512000  | 2.506392000                            | 0.044088000  | N | 2.028062000  | 2.106989000                            | 0.013216000  |
| N | -0.607778000 | 3.781688000                            | -0.068644000 | N | 0.201997000  | 3.833313000                            | -0.069276000 |
| N | -2.805194000 | 2.532426000                            | 0.062133000  | N | -2.214079000 | 3.099988000                            | 0.078570000  |
| N | -0.592401000 | 1.372945000                            | 0.477886000  | N | -0.308501000 | 1.488449000                            | 0.515526000  |
| N | 1.521634000  | -0.010128000                           | 0.280805000  | N | 1.432583000  | -0.339374000                           | 0.246756000  |
| N | 3.679288000  | -1.279589000                           | 0.021437000  | N | 3.247114000  | -2.055832000                           | -0.057107000 |
| N | 1.521421000  | -2.528308000                           | 0.026075000  | N | 0.864847000  | -2.791912000                           | 0.007052000  |
| N | -2.988467000 | 0.035447000                            | 0.367875000  | N | -2.922881000 | 0.692636000                            | 0.331156000  |
| N | -5.019151000 | -1.211226000                           | -0.281227000 | N | -5.201583000 | -0.059715000                           | -0.280326000 |
| N | -2.843005000 | -2.474092000                           | 0.074222000  | N | -3.371719000 | -1.777921000                           | 0.099600000  |
| N | -0.668373000 | -3.767907000                           | -0.066965000 | N | -1.542272000 | -3.516664000                           | -0.056762000 |
| N | 1.498220000  | -5.015637000                           | -0.269758000 | N | 0.287894000  | -5.214664000                           | -0.287717000 |
| N | -0.653522000 | -6.218884000                           | -0.422240000 | N | -2.077407000 | -5.911203000                           | -0.404408000 |
| N | -2.829415000 | -4.944669000                           | -0.277185000 | N | -3.913651000 | -4.189079000                           | -0.232376000 |
| N | -4.983727000 | -3.666775000                           | -0.387068000 | N | -5.726608000 | -2.460598000                           | -0.347478000 |
| B | -3.496348000 | 3.779560000                            | -0.215043000 | B | -2.614513000 | 4.468629000                            | -0.190594000 |
| B | -5.677559000 | 2.557183000                            | -0.510526000 | B | -5.008691000 | 3.757027000                            | -0.488694000 |
| B | -5.703327000 | 0.049569000                            | -0.422347000 | B | -5.587570000 | 1.321639000                            | -0.417342000 |
| N | -2.746665000 | 4.999106000                            | -0.296570000 | N | -1.614769000 | 5.495399000                            | -0.271225000 |
| N | -4.921950000 | 3.756308000                            | -0.423137000 | N | -4.009859000 | 4.762331000                            | -0.395668000 |
| N | -4.998464000 | 1.302126000                            | -0.303786000 | N | -4.620426000 | 2.382719000                            | -0.296651000 |
| B | 5.125959000  | -1.290088000                           | -0.057744000 | B | 4.652812000  | -2.388121000                           | -0.168074000 |
| B | 2.935454000  | -5.018596000                           | -0.305520000 | B | 1.686154000  | -5.535652000                           | -0.354276000 |
| N | 5.829493000  | -0.044389000                           | -0.042092000 | N | 5.617354000  | -1.331592000                           | -0.166209000 |
| N | 3.670538000  | -3.787777000                           | -0.195496000 | N | 2.676489000  | -4.497182000                           | -0.264713000 |
| B | 5.113008000  | -3.794121000                           | -0.241590000 | B | 4.079056000  | -4.824461000                           | -0.346501000 |



|    |              |              |              |    |              |              |              |
|----|--------------|--------------|--------------|----|--------------|--------------|--------------|
| N  | 5.802641000  | -2.556178000 | -0.159104000 | N  | 5.029336000  | -3.772063000 | -0.282222000 |
| Si | -1.434948000 | -0.000158000 | 1.083723000  | Si | -1.430907000 | 0.340928000  | 1.175601000  |
| N  | -0.601084000 | -1.366872000 | 0.485264000  | N  | -0.943173000 | -1.190447000 | 0.518858000  |
| H  | -6.895160000 | -2.473554000 | -0.708876000 | H  | -7.318467000 | -0.869110000 | -0.681193000 |
| H  | -6.876524000 | 0.057702000  | -0.664762000 | H  | -6.731365000 | 1.590719000  | -0.653672000 |
| H  | -6.850711000 | 2.592432000  | -0.750928000 | H  | -6.147029000 | 4.049080000  | -0.724131000 |
| H  | -5.405628000 | 4.626168000  | -0.594522000 | H  | -4.291490000 | 5.718005000  | -0.560524000 |
| H  | -3.244900000 | 5.860125000  | -0.473330000 | H  | -1.913035000 | 6.445518000  | -0.441715000 |
| H  | -1.024049000 | 7.115879000  | -0.543864000 | H  | 0.531030000  | 7.178655000  | -0.534809000 |
| H  | 1.468884000  | 7.273417000  | -0.539543000 | H  | 2.999909000  | 6.777366000  | -0.552627000 |
| H  | 3.623509000  | 6.001889000  | -0.386440000 | H  | 4.818648000  | 5.055757000  | -0.430603000 |
| H  | 5.793557000  | 4.737308000  | -0.296382000 | H  | 6.650296000  | 3.337295000  | -0.385362000 |
| H  | 6.852280000  | 2.472928000  | -0.169821000 | H  | 7.174886000  | 0.892698000  | -0.298351000 |
| H  | 6.837751000  | -0.051996000 | -0.104069000 | H  | 6.596890000  | -1.563738000 | -0.250485000 |
| H  | 6.811218000  | -2.575959000 | -0.204790000 | H  | 6.006839000  | -4.015333000 | -0.352664000 |
| H  | 5.717706000  | -4.822395000 | -0.351060000 | H  | 4.438047000  | -5.960771000 | -0.469218000 |
| H  | 3.524317000  | -6.053433000 | -0.434430000 | H  | 2.030668000  | -6.674392000 | -0.492471000 |
| H  | 1.346141000  | -7.290814000 | -0.565897000 | H  | -0.367106000 | -7.399089000 | -0.579444000 |
| H  | -1.143691000 | -7.093425000 | -0.543018000 | H  | -2.752955000 | -6.652996000 | -0.518095000 |
| H  | -3.345895000 | -5.796443000 | -0.446216000 | H  | -4.607591000 | -4.905252000 | -0.394135000 |
| H  | -5.482468000 | -4.529979000 | -0.548557000 | H  | -6.409263000 | -3.189171000 | -0.498695000 |
| N  | -1.598581000 | -0.131929000 | 2.790614000  | N  | 0.271692000  | -0.054442000 | 3.112859000  |
| H  | -2.217830000 | 0.503060000  | 3.277585000  | H  | 0.294984000  | 0.792044000  | 3.674219000  |
| H  | -0.781179000 | -0.343787000 | 3.348063000  | H  | -0.093128000 | -0.802886000 | 3.695089000  |
|    |              |              |              | H  | 1.228155000  | -0.290454000 | 2.859266000  |

Table S7. Cartesian coordinates of optimized geometries of Lewis acid assisted N<sub>2</sub> activated systems calculated at the  $\omega$ B97X-D/6-31G(d) level of theory.

| <b>Li<sup>+</sup>-N<sub>2</sub>-Si<sub>8</sub>BN</b> |              |              |              | <b>Na<sup>+</sup>-N<sub>2</sub>-Si<sub>8</sub>BN</b> |              |              |              |
|------------------------------------------------------|--------------|--------------|--------------|------------------------------------------------------|--------------|--------------|--------------|
| N                                                    | -5.870552000 | 0.700935000  | 0.386434000  | N                                                    | 1.376299000  | 4.912047000  | -0.935122000 |
| B                                                    | -6.727838000 | 1.862245000  | 0.494769000  | B                                                    | 2.684904000  | 5.463840000  | -1.202601000 |
| B                                                    | -6.439889000 | -0.620730000 | 0.389548000  | B                                                    | 0.226888000  | 5.781982000  | -0.852169000 |
| B                                                    | -6.178096000 | -3.101839000 | 0.196314000  | B                                                    | -2.235290000 | 6.114661000  | -0.566113000 |
| B                                                    | -3.900883000 | -4.114160000 | -0.071906000 | B                                                    | -3.735737000 | 4.145470000  | -0.162888000 |
| B                                                    | -4.158880000 | -1.621611000 | 0.170676000  | B                                                    | -1.254641000 | 3.815229000  | -0.408838000 |
| B                                                    | -4.441797000 | 0.877495000  | 0.263743000  | B                                                    | 1.215775000  | 3.487406000  | -0.773815000 |
| B                                                    | -4.721795000 | 3.358692000  | 0.283944000  | B                                                    | 3.659621000  | 3.151318000  | -1.189329000 |
| B                                                    | -2.428304000 | 2.369957000  | 0.053360000  | B                                                    | 2.179971000  | 1.164388000  | -0.803760000 |
| B                                                    | -2.165259000 | -0.114440000 | 0.178340000  | B                                                    | -0.242161000 | 1.539205000  | -0.250995000 |
| B                                                    | -1.886447000 | -2.651769000 | 0.024470000  | B                                                    | -2.750537000 | 1.868666000  | 0.076124000  |
| B                                                    | 0.441442000  | -3.676313000 | -0.471488000 | B                                                    | -4.317847000 | -0.187175000 | 0.255058000  |
| B                                                    | -0.128809000 | 1.432908000  | -0.186300000 | B                                                    | 0.712732000  | -0.850961000 | -0.502594000 |
| B                                                    | -0.475707000 | 3.886065000  | -0.415585000 | B                                                    | 3.128119000  | -1.157989000 | -1.101185000 |
| B                                                    | 1.789114000  | 2.892381000  | -0.857568000 | B                                                    | 1.599952000  | -3.164633000 | -0.908991000 |
| B                                                    | 2.168971000  | 0.432275000  | -0.654913000 | B                                                    | -0.822104000 | -2.881689000 | -0.343729000 |
| B                                                    | 2.473914000  | -2.160056000 | -0.752326000 | B                                                    | -3.357309000 | -2.546190000 | 0.045979000  |
| B                                                    | 4.612519000  | -3.103802000 | -1.631419000 | B                                                    | -4.888642000 | -4.488050000 | -0.258924000 |
| B                                                    | 4.342919000  | -0.605554000 | -1.401532000 | B                                                    | -2.394568000 | -4.808624000 | -0.421173000 |
| B                                                    | 4.014117000  | 1.895092000  | -1.495752000 | B                                                    | 0.064584000  | -5.155139000 | -0.864905000 |
| B                                                    | 3.683187000  | 4.378895000  | -1.549523000 | B                                                    | 2.506512000  | -5.454610000 | -1.360027000 |
| N                                                    | -5.324916000 | -4.227697000 | 0.021913000  | N                                                    | -3.521440000 | 5.551075000  | -0.352491000 |
| N                                                    | -5.591619000 | -1.779581000 | 0.258679000  | N                                                    | -1.080336000 | 5.236610000  | -0.602385000 |
| N                                                    | -6.132159000 | 3.150347000  | 0.447446000  | N                                                    | 3.789595000  | 4.571584000  | -1.304865000 |
| N                                                    | -3.851091000 | 2.195037000  | 0.214367000  | N                                                    | 2.350511000  | 2.590557000  | -0.894302000 |

|    |              |              |              |    |              |              |              |
|----|--------------|--------------|--------------|----|--------------|--------------|--------------|
| N  | -3.584244000 | -0.286608000 | 0.192734000  | N  | -0.088563000 | 2.941199000  | -0.484194000 |
| N  | -3.309929000 | -2.792236000 | 0.032271000  | N  | -2.574565000 | 3.271411000  | -0.169749000 |
| N  | -0.987850000 | -3.780419000 | -0.231841000 | N  | -4.064298000 | 1.251211000  | 0.216069000  |
| N  | -1.358484000 | -1.319006000 | 0.257645000  | N  | -1.540478000 | 1.068534000  | 0.153927000  |
| N  | -1.541836000 | 1.204993000  | 0.064736000  | N  | 0.884943000  | 0.599602000  | -0.426410000 |
| N  | -1.871840000 | 3.694403000  | -0.124832000 | N  | 3.298451000  | 0.274424000  | -1.055127000 |
| N  | 0.400794000  | 2.731378000  | -0.489763000 | N  | 1.826729000  | -1.720612000 | -0.794617000 |
| N  | 1.138299000  | -2.411343000 | -0.294710000 | N  | -3.225189000 | -1.138604000 | 0.368125000  |
| N  | 3.251842000  | -3.290001000 | -1.187168000 | N  | -4.695431000 | -3.067156000 | -0.061175000 |
| N  | 3.027807000  | -0.778857000 | -0.755763000 | N  | -2.176234000 | -3.382976000 | -0.181864000 |
| N  | 2.665840000  | 1.730817000  | -0.991867000 | N  | 0.284961000  | -3.725290000 | -0.708823000 |
| N  | 2.318134000  | 4.211739000  | -1.113392000 | N  | 2.717958000  | -4.022198000 | -1.226460000 |
| N  | 4.496998000  | 3.218239000  | -1.734206000 | N  | 1.199915000  | -5.976457000 | -1.176778000 |
| N  | 4.806458000  | 0.712139000  | -1.692710000 | N  | -1.264535000 | -5.649723000 | -0.697355000 |
| N  | 5.125818000  | -1.774578000 | -1.679108000 | N  | -3.737338000 | -5.312216000 | -0.391533000 |
| B  | -1.604858000 | -5.096314000 | -0.405275000 | B  | -5.226465000 | 2.136784000  | 0.151023000  |
| B  | 0.627014000  | -6.104723000 | -1.013751000 | B  | -6.783890000 | 0.154783000  | 0.145410000  |
| B  | 2.635171000  | -4.608395000 | -1.226373000 | B  | -5.827166000 | -2.169081000 | 0.029512000  |
| N  | -3.019796000 | -5.229709000 | -0.261548000 | N  | -5.021944000 | 3.549656000  | 0.028719000  |
| N  | -0.757003000 | -6.213084000 | -0.735216000 | N  | -6.538646000 | 1.552496000  | 0.187908000  |
| N  | 1.246087000  | -4.794400000 | -0.904575000 | N  | -5.644431000 | -0.740463000 | 0.146410000  |
| B  | -2.743701000 | 4.858618000  | -0.055896000 | B  | 4.612674000  | 0.834821000  | -1.342028000 |
| B  | 1.458610000  | 5.368945000  | -0.977123000 | B  | 4.024673000  | -3.467101000 | -1.457848000 |
| N  | -4.137081000 | 4.660532000  | 0.180834000  | N  | 4.768850000  | 2.253129000  | -1.339158000 |
| N  | 0.076129000  | 5.205832000  | -0.633820000 | N  | 4.233552000  | -2.040090000 | -1.386761000 |
| B  | -0.789084000 | 6.365892000  | -0.528216000 | B  | 5.543780000  | -1.482675000 | -1.648360000 |
| N  | -2.159958000 | 6.160425000  | -0.235600000 | N  | 5.700966000  | -0.071611000 | -1.586146000 |
| Si | 0.290998000  | -1.149903000 | 0.436850000  | Si | -1.687560000 | -0.533861000 | 0.639070000  |
| N  | 0.830595000  | 0.337901000  | -0.146897000 | N  | -0.522762000 | -1.478409000 | -0.139430000 |
| H  | 5.291334000  | -4.029371000 | -1.958023000 | H  | -5.985437000 | -4.957579000 | -0.312728000 |
| H  | 3.301564000  | -5.543277000 | -1.554438000 | H  | -6.932687000 | -2.617770000 | -0.024092000 |
| H  | 1.272887000  | -7.057707000 | -1.332469000 | H  | -7.898025000 | -0.273796000 | 0.103723000  |
| H  | -1.175927000 | -7.127375000 | -0.835097000 | H  | -7.344960000 | 2.161247000  | 0.166801000  |
| H  | -3.426457000 | -6.149423000 | -0.364450000 | H  | -5.836771000 | 4.147428000  | 0.003723000  |
| H  | -5.760837000 | -5.137571000 | -0.029772000 | H  | -4.309457000 | 6.183311000  | -0.341367000 |
| H  | -7.360796000 | -3.247863000 | 0.284941000  | H  | -2.103160000 | 7.292168000  | -0.720469000 |
| H  | -7.621867000 | -0.760472000 | 0.494983000  | H  | 0.367375000  | 6.959094000  | -0.998466000 |
| H  | -7.910036000 | 1.738296000  | 0.619751000  | H  | 2.840820000  | 6.640299000  | -1.337155000 |
| H  | -6.746776000 | 3.949498000  | 0.512335000  | H  | 4.693636000  | 4.975083000  | -1.506992000 |
| H  | -4.742861000 | 5.468279000  | 0.224101000  | H  | 5.676540000  | 2.641802000  | -1.556671000 |
| H  | -2.751340000 | 6.977601000  | -0.178080000 | H  | 6.616962000  | 0.302620000  | -1.792660000 |
| H  | -0.349960000 | 7.465872000  | -0.688271000 | H  | 6.471575000  | -2.192000000 | -1.897257000 |
| H  | 1.911319000  | 6.459340000  | -1.159254000 | H  | 4.944213000  | -4.186143000 | -1.709135000 |
| H  | 4.134800000  | 5.464614000  | -1.757601000 | H  | 3.421484000  | -6.176110000 | -1.622486000 |
| H  | 5.434223000  | 3.361550000  | -2.083834000 | H  | 1.079993000  | -6.974072000 | -1.284070000 |
| H  | 5.712997000  | 0.811913000  | -2.129751000 | H  | -1.432198000 | -6.636440000 | -0.840380000 |
| H  | 6.049476000  | -1.658527000 | -2.073474000 | H  | -3.894893000 | -6.298884000 | -0.542849000 |
| C  | 4.650400000  | 1.498862000  | 2.691422000  | C  | 3.277834000  | 0.400222000  | 4.244065000  |
| C  | 5.442771000  | 1.279007000  | 1.560995000  | C  | 3.465865000  | 1.372173000  | 3.256945000  |
| C  | 6.117682000  | 0.064632000  | 1.407668000  | C  | 4.270611000  | 1.096030000  | 2.149505000  |
| C  | 6.000923000  | -0.929380000 | 2.384745000  | C  | 4.886064000  | -0.153055000 | 2.025608000  |
| C  | 5.215438000  | -0.703433000 | 3.519112000  | C  | 4.699163000  | -1.124646000 | 3.011983000  |
| C  | 4.542128000  | 0.510224000  | 3.672294000  | C  | 3.894980000  | -0.847077000 | 4.122271000  |
| H  | 4.124305000  | 2.440857000  | 2.807873000  | H  | 2.658137000  | 0.616769000  | 5.108281000  |
| H  | 5.527588000  | 2.049159000  | 0.801624000  | H  | 2.994258000  | 2.344867000  | 3.356818000  |
| H  | 6.724704000  | -0.110224000 | 0.526314000  | H  | 4.423995000  | 1.850196000  | 1.383621000  |
| H  | 6.523767000  | -1.872822000 | 2.264117000  | H  | 5.512201000  | -0.362640000 | 1.163574000  |
| H  | 5.121677000  | -1.474276000 | 4.276694000  | H  | 5.190223000  | -2.089023000 | 2.923264000  |

|                                                     |              |              |              |                                                      |              |              |              |
|-----------------------------------------------------|--------------|--------------|--------------|------------------------------------------------------|--------------|--------------|--------------|
| H                                                   | 3.921314000  | 0.677356000  | 4.545765000  | H                                                    | 3.760502000  | -1.596376000 | 4.896307000  |
| Li                                                  | 3.697537000  | -0.561532000 | 1.418306000  | N                                                    | -1.262473000 | -0.547440000 | 2.462655000  |
| N                                                   | 1.948081000  | -1.060108000 | 2.509957000  | N                                                    | -0.159806000 | -0.685804000 | 2.847071000  |
| N                                                   | 0.813207000  | -1.210008000 | 2.245530000  | Na                                                   | 2.084132000  | -0.765133000 | 1.880391000  |
| <b>K<sup>+</sup>-N<sub>2</sub>-Si<sub>B</sub>BN</b> |              |              |              | <b>Rb<sup>+</sup>-N<sub>2</sub>-Si<sub>B</sub>BN</b> |              |              |              |
| N                                                   | 0.828819000  | -5.318609000 | -0.625720000 | N                                                    | -1.576058000 | 5.251934000  | -0.629169000 |
| B                                                   | -0.132813000 | -6.376560000 | -0.840967000 | B                                                    | -0.748230000 | 6.413432000  | -0.865063000 |
| B                                                   | 2.226779000  | -5.633670000 | -0.468184000 | B                                                    | -2.993452000 | 5.406060000  | -0.414152000 |
| B                                                   | 4.598214000  | -4.906531000 | -0.151472000 | B                                                    | -5.253751000 | 4.413241000  | -0.013361000 |
| B                                                   | 5.149630000  | -2.471973000 | 0.085033000  | B                                                    | -5.518202000 | 1.929299000  | 0.206231000  |
| B                                                   | 2.759474000  | -3.206456000 | -0.181817000 | B                                                    | -3.238369000 | 2.931335000  | -0.144747000 |
| B                                                   | 0.387102000  | -3.944849000 | -0.579025000 | B                                                    | -0.980943000 | 3.936118000  | -0.617474000 |
| B                                                   | -1.967423000 | -4.672004000 | -1.004710000 | B                                                    | 1.260515000  | 4.928636000  | -1.111225000 |
| B                                                   | -1.438139000 | -2.229430000 | -0.785898000 | B                                                    | 1.018828000  | 2.439958000  | -0.903922000 |
| B                                                   | 0.899235000  | -1.539144000 | -0.198049000 | B                                                    | -1.203791000 | 1.484237000  | -0.252000000 |
| B                                                   | 3.310933000  | -0.789577000 | 0.150182000  | B                                                    | -3.501240000 | 0.464594000  | 0.170356000  |
| B                                                   | 3.901847000  | 1.730102000  | 0.103717000  | B                                                    | -3.807065000 | -2.104725000 | 0.107169000  |
| B                                                   | -0.956889000 | 0.209443000  | -0.574129000 | B                                                    | 0.825125000  | -0.040479000 | -0.702105000 |
| B                                                   | -3.253224000 | -0.538339000 | -1.213440000 | B                                                    | 3.001757000  | 0.969109000  | -1.391664000 |
| B                                                   | -2.689825000 | 1.916775000  | -1.210433000 | B                                                    | 2.716146000  | -1.531870000 | -1.411716000 |
| B                                                   | -0.381271000 | 2.699025000  | -0.598365000 | B                                                    | 0.530217000  | -2.575559000 | -0.750409000 |
| B                                                   | 2.066683000  | 3.459715000  | -0.278907000 | B                                                    | -1.804330000 | -3.611111000 | -0.364735000 |
| B                                                   | 2.671141000  | 5.829300000  | -0.759087000 | B                                                    | -2.156731000 | -6.026181000 | -0.871594000 |
| B                                                   | 0.265407000  | 5.090767000  | -0.879696000 | B                                                    | 0.146906000  | -5.021792000 | -1.048395000 |
| B                                                   | -2.118189000 | 4.372146000  | -1.281990000 | B                                                    | 2.421323000  | -4.034584000 | -1.506388000 |
| B                                                   | -4.462985000 | 3.604640000  | -1.755177000 | B                                                    | 4.657977000  | -3.004688000 | -2.008592000 |
| N                                                   | 5.535213000  | -3.850966000 | 0.013897000  | N                                                    | -6.059063000 | 3.256885000  | 0.173980000  |
| N                                                   | 3.189198000  | -4.583919000 | -0.260431000 | N                                                    | -3.823341000 | 4.252547000  | -0.185043000 |
| N                                                   | -1.500315000 | -6.025752000 | -1.011067000 | N                                                    | 0.643379000  | 6.221163000  | -1.087907000 |
| N                                                   | -1.008321000 | -3.603611000 | -0.770149000 | N                                                    | 0.436428000  | 3.756609000  | -0.860919000 |
| N                                                   | 1.345183000  | -2.892358000 | -0.331087000 | N                                                    | -1.804764000 | 2.780028000  | -0.351066000 |
| N                                                   | 3.734226000  | -2.152785000 | 0.012644000  | N                                                    | -4.080768000 | 1.772799000  | 0.070483000  |
| N                                                   | 4.258228000  | 0.320449000  | 0.209734000  | N                                                    | -4.315458000 | -0.745772000 | 0.248967000  |
| N                                                   | 1.876792000  | -0.551659000 | 0.195705000  | N                                                    | -2.050111000 | 0.389013000  | 0.157959000  |
| N                                                   | -0.495952000 | -1.161849000 | -0.465442000 | N                                                    | 0.215137000  | 1.270039000  | -0.567014000 |
| N                                                   | -2.820033000 | -1.903302000 | -1.087115000 | N                                                    | 2.420821000  | 2.275735000  | -1.243561000 |
| N                                                   | -2.302731000 | 0.535040000  | -0.988894000 | N                                                    | 2.183770000  | -0.206211000 | -1.165573000 |
| N                                                   | 2.512513000  | 2.151430000  | 0.136380000  | N                                                    | -2.379620000 | -2.367679000 | 0.086850000  |
| N                                                   | 3.073003000  | 4.475034000  | -0.452973000 | N                                                    | -2.696263000 | -4.731101000 | -0.525899000 |
| N                                                   | 0.643449000  | 3.724698000  | -0.526209000 | N                                                    | -0.369311000 | -3.712615000 | -0.660347000 |
| N                                                   | -1.738757000 | 2.992516000  | -1.004587000 | N                                                    | 1.896117000  | -2.710409000 | -1.209256000 |
| N                                                   | -4.064450000 | 2.226332000  | -1.533042000 | N                                                    | 4.113240000  | -1.683060000 | -1.758813000 |
| N                                                   | -3.489404000 | 4.630465000  | -1.621076000 | N                                                    | 3.808422000  | -4.135464000 | -1.868357000 |
| N                                                   | -1.112933000 | 5.377584000  | -1.173594000 | N                                                    | 1.540427000  | -5.149565000 | -1.383136000 |
| N                                                   | 1.282934000  | 6.097882000  | -0.929571000 | N                                                    | -0.752770000 | -6.136182000 | -1.087249000 |
| B                                                   | 5.681788000  | -0.013676000 | 0.210698000  | B                                                    | -5.765674000 | -0.574491000 | 0.311442000  |
| B                                                   | 6.294286000  | 2.423866000  | 0.009740000  | B                                                    | -6.108528000 | -3.062306000 | 0.086326000  |
| B                                                   | 4.473158000  | 4.130601000  | -0.302881000 | B                                                    | -4.120458000 | -4.547807000 | -0.325077000 |
| N                                                   | 6.076264000  | -1.389397000 | 0.219137000  | N                                                    | -6.311712000 | 0.747761000  | 0.360787000  |
| N                                                   | 6.639830000  | 1.058458000  | 0.179508000  | N                                                    | -6.598184000 | -1.747407000 | 0.297574000  |
| N                                                   | 4.888129000  | 2.769175000  | -0.065958000 | N                                                    | -4.676699000 | -3.245868000 | -0.047557000 |
| B                                                   | -3.786083000 | -2.973629000 | -1.290120000 | B                                                    | 3.252843000  | 3.450228000  | -1.459744000 |
| B                                                   | -5.029126000 | 1.161606000  | -1.689047000 | B                                                    | 4.949228000  | -0.514196000 | -1.918314000 |
| N                                                   | -3.341904000 | -4.324729000 | -1.217256000 | N                                                    | 2.659030000  | 4.741524000  | -1.366939000 |
| N                                                   | -4.627907000 | -0.207405000 | -1.524175000 | N                                                    | 4.400425000  | 0.798745000  | -1.729667000 |
| B                                                   | -5.598066000 | -1.273628000 | -1.688822000 | B                                                    | 5.238961000  | 1.970029000  | -1.905206000 |
| N                                                   | -5.157968000 | -2.611918000 | -1.536393000 | N                                                    | 4.651868000  | 3.248994000  | -1.739556000 |
| Si                                                  | 1.359733000  | 1.004078000  | 0.557638000  | Si                                                   | -1.348494000 | -1.101224000 | 0.488945000  |

|                                                      |              |              |              |                                                      |              |              |              |
|------------------------------------------------------|--------------|--------------|--------------|------------------------------------------------------|--------------|--------------|--------------|
| N                                                    | -0.114276000 | 1.328572000  | -0.218361000 | N                                                    | 0.123634000  | -1.250904000 | -0.341241000 |
| N                                                    | 1.077779000  | 1.131564000  | 2.389628000  | N                                                    | -1.012369000 | -1.205332000 | 2.309600000  |
| N                                                    | 0.060582000  | 1.465775000  | 2.879480000  | N                                                    | 0.043747000  | -1.433939000 | 2.778612000  |
| H                                                    | 3.479102000  | 6.702079000  | -0.866030000 | H                                                    | -2.865081000 | -6.981996000 | -0.973782000 |
| H                                                    | 5.297378000  | 4.989581000  | -0.400440000 | H                                                    | -4.846656000 | -5.491842000 | -0.413960000 |
| H                                                    | 7.136367000  | 3.267435000  | -0.071955000 | H                                                    | -6.854444000 | -3.992899000 | 0.017776000  |
| H                                                    | 7.624508000  | 0.833169000  | 0.208067000  | H                                                    | -7.600008000 | -1.635070000 | 0.367393000  |
| H                                                    | 7.064261000  | -1.602248000 | 0.238684000  | H                                                    | -7.315622000 | 0.847860000  | 0.423833000  |
| H                                                    | 6.511943000  | -4.101720000 | 0.075201000  | H                                                    | -7.054174000 | 3.395111000  | 0.280225000  |
| H                                                    | 4.966099000  | -6.042083000 | -0.208170000 | H                                                    | -5.749351000 | 5.500315000  | -0.036310000 |
| H                                                    | 2.586476000  | -6.771841000 | -0.517189000 | H                                                    | -3.480732000 | 6.496527000  | -0.432160000 |
| H                                                    | 0.211228000  | -7.520160000 | -0.876480000 | H                                                    | -1.220665000 | 7.510609000  | -0.873123000 |
| H                                                    | -2.156783000 | -6.777263000 | -1.169044000 | H                                                    | 1.204616000  | 7.043679000  | -1.258695000 |
| H                                                    | -4.009935000 | -5.067163000 | -1.372332000 | H                                                    | 3.233326000  | 5.556674000  | -1.532258000 |
| H                                                    | -5.842874000 | -3.343593000 | -1.666439000 | H                                                    | 5.245632000  | 4.054936000  | -1.878859000 |
| H                                                    | -6.741687000 | -1.024764000 | -1.929360000 | H                                                    | 6.398860000  | 1.851788000  | -2.166431000 |
| H                                                    | -6.166376000 | 1.426373000  | -1.940821000 | H                                                    | 6.104588000  | -0.650049000 | -2.189560000 |
| H                                                    | -5.594265000 | 3.868369000  | -2.033099000 | H                                                    | 5.806340000  | -3.140140000 | -2.307783000 |
| H                                                    | -3.787005000 | 5.578664000  | -1.805294000 | H                                                    | 4.206425000  | -5.042323000 | -2.070477000 |
| H                                                    | -1.359125000 | 6.331493000  | -1.401257000 | H                                                    | 1.885747000  | -6.067247000 | -1.630454000 |
| H                                                    | 1.025195000  | 7.047387000  | -1.160251000 | H                                                    | -0.398728000 | -7.046477000 | -1.346650000 |
| C                                                    | -2.843225000 | -1.415487000 | 2.423432000  | C                                                    | 2.607325000  | 1.840807000  | 2.241388000  |
| C                                                    | -4.148015000 | -1.081586000 | 2.054319000  | C                                                    | 3.956353000  | 1.712749000  | 1.905541000  |
| C                                                    | -4.913394000 | -0.248450000 | 2.872116000  | C                                                    | 4.837786000  | 1.089296000  | 2.790861000  |
| C                                                    | -4.376405000 | 0.244248000  | 4.064857000  | C                                                    | 4.369581000  | 0.598107000  | 4.012460000  |
| C                                                    | -3.071980000 | -0.092323000 | 4.434561000  | C                                                    | 3.019076000  | 0.724774000  | 4.345440000  |
| C                                                    | -2.304736000 | -0.920443000 | 3.612085000  | C                                                    | 2.137579000  | 1.345005000  | 3.458085000  |
| H                                                    | -2.254959000 | -2.076303000 | 1.794986000  | H                                                    | 1.926996000  | 2.347330000  | 1.565445000  |
| H                                                    | -4.574920000 | -1.488686000 | 1.143358000  | H                                                    | 4.323382000  | 2.119936000  | 0.968159000  |
| H                                                    | -5.935326000 | -0.006711000 | 2.595048000  | H                                                    | 5.892150000  | 1.009732000  | 2.542010000  |
| H                                                    | -4.981957000 | 0.868518000  | 4.715594000  | H                                                    | 5.061407000  | 0.140925000  | 4.714363000  |
| H                                                    | -2.657083000 | 0.278313000  | 5.367001000  | H                                                    | 2.656170000  | 0.356159000  | 5.300345000  |
| H                                                    | -1.292611000 | -1.183925000 | 3.902742000  | H                                                    | 1.089568000  | 1.452030000  | 3.720100000  |
| K                                                    | -2.564523000 | 1.821190000  | 1.916603000  | Rb                                                   | 2.896161000  | -1.638680000 | 1.854837000  |
| <b>Cs<sup>+</sup>-N<sub>2</sub>-Si<sub>B</sub>BN</b> |              |              |              | <b>BF<sub>3</sub>-N<sub>2</sub>-Si<sub>B</sub>BN</b> |              |              |              |
| N                                                    | 0.548993000  | 5.100649000  | -1.288161000 | N                                                    | 4.730112000  | 2.686535000  | -0.257886000 |
| B                                                    | 1.771363000  | 5.800830000  | -1.610617000 | B                                                    | 6.121088000  | 2.303549000  | -0.180952000 |
| B                                                    | -0.686315000 | 5.829840000  | -1.127786000 | B                                                    | 4.363631000  | 4.072343000  | -0.372363000 |
| B                                                    | -3.145774000 | 5.872392000  | -0.672259000 | B                                                    | 2.622172000  | 5.848260000  | -0.629193000 |
| B                                                    | -4.374369000 | 3.740613000  | -0.182265000 | B                                                    | 0.193002000  | 5.230608000  | -0.701114000 |
| B                                                    | -1.895095000 | 3.704201000  | -0.594978000 | B                                                    | 1.940403000  | 3.447270000  | -0.401248000 |
| B                                                    | 0.565773000  | 3.666794000  | -1.124044000 | B                                                    | 3.702623000  | 1.663557000  | -0.227230000 |
| B                                                    | 3.017005000  | 3.621690000  | -1.616022000 | B                                                    | 5.448896000  | -0.115658000 | -0.114912000 |
| B                                                    | 1.788662000  | 1.472265000  | -1.207629000 | B                                                    | 3.022885000  | -0.757580000 | -0.168016000 |
| B                                                    | -0.619582000 | 1.557354000  | -0.531836000 | B                                                    | 1.293939000  | 1.045289000  | -0.141823000 |
| B                                                    | -3.114543000 | 1.594110000  | -0.025674000 | B                                                    | -0.488459000 | 2.854922000  | -0.367023000 |
| B                                                    | -4.418994000 | -0.629760000 | 0.207747000  | B                                                    | -2.973138000 | 2.196406000  | -0.672965000 |
| B                                                    | 0.591597000  | -0.691651000 | -0.857366000 | B                                                    | 0.621571000  | -1.445729000 | -0.221731000 |
| B                                                    | 2.982902000  | -0.711755000 | -1.575415000 | B                                                    | 2.394691000  | -3.183557000 | -0.384702000 |
| B                                                    | 1.709206000  | -2.879923000 | -1.364282000 | B                                                    | -0.022303000 | -3.826856000 | -0.632407000 |
| B                                                    | -0.673733000 | -2.887338000 | -0.602195000 | B                                                    | -1.823774000 | -2.097402000 | -0.525648000 |
| B                                                    | -3.204698000 | -2.854852000 | -0.082782000 | B                                                    | -3.636646000 | -0.264718000 | -0.751288000 |
| B                                                    | -4.512536000 | -4.964415000 | -0.308935000 | B                                                    | -5.944360000 | -0.905996000 | -1.445321000 |
| B                                                    | -2.010987000 | -4.989314000 | -0.611851000 | B                                                    | -4.191142000 | -2.676967000 | -1.064139000 |
| B                                                    | 0.441890000  | -5.044368000 | -1.191205000 | B                                                    | -2.425368000 | -4.470578000 | -0.999661000 |
| B                                                    | 2.884884000  | -5.056869000 | -1.771652000 | B                                                    | -0.635541000 | -6.226097000 | -1.018681000 |
| N                                                    | -4.339788000 | 5.162012000  | -0.374694000 | N                                                    | 1.250603000  | 6.201221000  | -0.752703000 |
| N                                                    | -1.901549000 | 5.136409000  | -0.792434000 | N                                                    | 2.979306000  | 4.457048000  | -0.463366000 |

|    |              |              |              |    |              |              |              |
|----|--------------|--------------|--------------|----|--------------|--------------|--------------|
| N  | 2.970708000  | 5.046101000  | -1.750740000 | N  | 6.443569000  | 0.923527000  | -0.102746000 |
| N  | 1.790442000  | 2.910604000  | -1.298103000 | N  | 4.049409000  | 0.264119000  | -0.156015000 |
| N  | -0.644582000 | 2.972555000  | -0.754658000 | N  | 2.312768000  | 2.051338000  | -0.270621000 |
| N  | -3.122700000 | 3.009175000  | -0.271502000 | N  | 0.549091000  | 3.841676000  | -0.499716000 |
| N  | -4.338729000 | 0.828218000  | 0.182545000  | N  | -1.899578000 | 3.181475000  | -0.574775000 |
| N  | -1.817918000 | 0.941398000  | -0.025110000 | N  | -0.072563000 | 1.507097000  | -0.049754000 |
| N  | 0.582905000  | 0.761890000  | -0.811422000 | N  | 1.617269000  | -0.379652000 | -0.125700000 |
| N  | 3.002440000  | 0.724562000  | -1.483876000 | N  | 3.396790000  | -2.154814000 | -0.235508000 |
| N  | 1.755255000  | -1.425587000 | -1.301310000 | N  | 0.999045000  | -2.817650000 | -0.425121000 |
| N  | -3.218523000 | -1.444017000 | 0.231215000  | N  | -2.737020000 | 0.801812000  | -0.375292000 |
| N  | -4.476606000 | -3.531832000 | -0.114721000 | N  | -4.964938000 | 0.121925000  | -1.174943000 |
| N  | -1.947018000 | -3.549996000 | -0.374650000 | N  | -3.205982000 | -1.659342000 | -0.723124000 |
| N  | 0.495467000  | -3.597723000 | -1.059296000 | N  | -1.421787000 | -3.462752000 | -0.729013000 |
| N  | 2.924495000  | -3.607069000 | -1.667367000 | N  | 0.369778000  | -5.215437000 | -0.777084000 |
| N  | 1.656008000  | -5.728259000 | -1.545655000 | N  | -1.998033000 | -5.835532000 | -1.129165000 |
| N  | -0.804335000 | -5.695139000 | -0.946841000 | N  | -3.788570000 | -4.050641000 | -1.130205000 |
| N  | -3.281151000 | -5.648266000 | -0.514271000 | N  | -5.540588000 | -2.263852000 | -1.350375000 |
| B  | -5.596854000 | 1.571295000  | 0.202978000  | B  | -2.233155000 | 4.572696000  | -0.849079000 |
| B  | -6.910958000 | -0.578864000 | 0.267497000  | B  | -4.632040000 | 3.947405000  | -1.306593000 |
| B  | -5.698407000 | -2.773163000 | 0.056377000  | B  | -5.297140000 | 1.521413000  | -1.305401000 |
| N  | -5.567606000 | 2.999204000  | 0.088122000  | N  | -1.193686000 | 5.559598000  | -0.842477000 |
| N  | -6.828126000 | 0.837768000  | 0.314166000  | N  | -3.601489000 | 4.910398000  | -1.144735000 |
| N  | -5.677795000 | -1.334080000 | 0.177067000  | N  | -4.308104000 | 2.554048000  | -1.101097000 |
| B  | 4.244368000  | 1.436721000  | -1.743338000 | B  | 4.796882000  | -2.532456000 | -0.196895000 |
| B  | 4.157546000  | -2.901813000 | -1.897838000 | B  | 1.758976000  | -5.583513000 | -0.694530000 |
| N  | 4.228241000  | 2.863636000  | -1.757656000 | N  | 5.787582000  | -1.505178000 | -0.098825000 |
| N  | 4.197300000  | -1.463070000 | -1.815398000 | N  | 2.770025000  | -4.579371000 | -0.500539000 |
| B  | 5.446117000  | -0.754198000 | -2.021351000 | B  | 4.164080000  | -4.951743000 | -0.430857000 |
| N  | 5.437600000  | 0.662555000  | -1.959144000 | N  | 5.134819000  | -3.928625000 | -0.270811000 |
| Si | -1.747668000 | -0.666246000 | 0.469336000  | Si | -1.266174000 | 0.384226000  | 0.331552000  |
| N  | -0.514101000 | -1.468499000 | -0.370515000 | N  | -0.792601000 | -1.159676000 | -0.145548000 |
| N  | -1.361620000 | -0.660092000 | 2.278618000  | H  | -7.067816000 | -0.622087000 | -1.744706000 |
| N  | -0.350509000 | -1.036521000 | 2.752106000  | H  | -6.411072000 | 1.830724000  | -1.614242000 |
| H  | -5.547356000 | -5.560573000 | -0.298358000 | H  | -5.740307000 | 4.281847000  | -1.610150000 |
| H  | -6.744713000 | -3.349110000 | 0.072553000  | H  | -3.840852000 | 5.877656000  | -1.310353000 |
| H  | -7.968300000 | -1.134085000 | 0.298465000  | H  | -1.446578000 | 6.522866000  | -1.013601000 |
| H  | -7.699222000 | 1.348342000  | 0.354774000  | H  | 1.027952000  | 7.178669000  | -0.874829000 |
| H  | -6.446622000 | 3.497433000  | 0.120657000  | H  | 3.469243000  | 6.693352000  | -0.669456000 |
| H  | -5.194281000 | 5.696820000  | -0.307026000 | H  | 5.215956000  | 4.912155000  | -0.400271000 |
| H  | -3.165737000 | 7.056941000  | -0.827835000 | H  | 6.985218000  | 3.132261000  | -0.187710000 |
| H  | -0.696154000 | 7.014744000  | -1.277760000 | H  | 7.420709000  | 0.672153000  | -0.059724000 |
| H  | 1.780527000  | 6.986556000  | -1.753727000 | H  | 6.762397000  | -1.769173000 | -0.074220000 |
| H  | 3.813950000  | 5.553725000  | -1.978853000 | H  | 6.105307000  | -4.205377000 | -0.233615000 |
| H  | 5.084361000  | 3.357808000  | -1.969503000 | H  | 4.495678000  | -6.099223000 | -0.513090000 |
| H  | 6.311605000  | 1.139922000  | -2.131378000 | H  | 2.074893000  | -6.733154000 | -0.798975000 |
| H  | 6.459990000  | -1.353362000 | -2.222532000 | H  | -0.327063000 | -7.377052000 | -1.134257000 |
| H  | 5.160366000  | -3.509172000 | -2.126503000 | H  | -2.680219000 | -6.559488000 | -1.303076000 |
| H  | 3.877567000  | -5.667176000 | -2.035275000 | H  | -4.489537000 | -4.745597000 | -1.346505000 |
| H  | 1.652451000  | -6.734574000 | -1.638522000 | H  | -6.233208000 | -2.968876000 | -1.558982000 |
| H  | -0.861295000 | -6.695938000 | -1.078532000 | N  | -1.518809000 | 0.485810000  | 2.155349000  |
| H  | -3.330218000 | -6.646363000 | -0.664487000 | N  | -1.397200000 | -0.367307000 | 2.950426000  |
| C  | 1.888183000  | 2.237031000  | 2.193050000  | B  | -1.721542000 | -0.167936000 | 4.933902000  |
| C  | 3.252412000  | 2.273356000  | 1.900387000  | F  | -1.868515000 | 1.162332000  | 4.990842000  |
| C  | 4.179109000  | 1.835206000  | 2.847418000  | F  | -0.567134000 | -0.689386000 | 5.364940000  |
| C  | 3.741277000  | 1.360008000  | 4.085548000  | F  | -2.824345000 | -0.924062000 | 5.006994000  |
| C  | 2.375939000  | 1.316240000  | 4.372726000  |    |              |              |              |
| C  | 1.449426000  | 1.756000000  | 3.426322000  |    |              |              |              |
| H  | 1.168459000  | 2.598534000  | 1.465957000  |    |              |              |              |

|                                                       |              |              |              |                                                                                 |              |              |
|-------------------------------------------------------|--------------|--------------|--------------|---------------------------------------------------------------------------------|--------------|--------------|
| H                                                     | 3.594073000  | 2.655158000  | 0.943045000  |                                                                                 |              |              |
| H                                                     | 5.242247000  | 1.885449000  | 2.629996000  |                                                                                 |              |              |
| H                                                     | 4.463836000  | 1.041473000  | 4.831462000  |                                                                                 |              |              |
| H                                                     | 2.033229000  | 0.954447000  | 5.337547000  |                                                                                 |              |              |
| H                                                     | 0.388407000  | 1.728613000  | 3.652750000  |                                                                                 |              |              |
| Cs                                                    | 2.732716000  | -1.387644000 | 1.905256000  |                                                                                 |              |              |
| <b>BCl<sub>3</sub>-N<sub>2</sub>-Si<sub>B</sub>BN</b> |              |              |              | <b>B(C<sub>6</sub>H<sub>5</sub>)<sub>3</sub>-N<sub>2</sub>-Si<sub>B</sub>BN</b> |              |              |
| N                                                     | -5.499261000 | -0.791704000 | -0.182645000 | N                                                                               | 5.183071000  | -2.227181000 |
| B                                                     | -6.640202000 | 0.089121000  | -0.072887000 | B                                                                               | 5.548652000  | -3.617460000 |
| B                                                     | -5.682765000 | -2.217275000 | -0.224039000 | B                                                                               | 6.179666000  | -1.241780000 |
| B                                                     | -4.746701000 | -4.526927000 | -0.444531000 | B                                                                               | 6.827024000  | 1.134000000  |
| B                                                     | -2.271668000 | -4.871549000 | -0.651195000 | B                                                                               | 5.077665000  | 2.930374000  |
| B                                                     | -3.208497000 | -2.550048000 | -0.389349000 | B                                                                               | 4.423330000  | 0.539147000  |
| B                                                     | -4.166440000 | -0.227523000 | -0.257240000 | B                                                                               | 3.795082000  | -1.833780000 |
| B                                                     | -5.112650000 | 2.080531000  | -0.190386000 | B                                                                               | 3.155231000  | -4.192157000 |
| B                                                     | -2.630558000 | 1.762647000  | -0.373544000 | B                                                                               | 1.397712000  | -2.407921000 |
| B                                                     | -1.703778000 | -0.554679000 | -0.303415000 | B                                                                               | 2.029533000  | -0.098130000 |
| B                                                     | -0.737116000 | -2.916504000 | -0.484398000 | B                                                                               | 2.675099000  | 2.317614000  |
| B                                                     | 1.797321000  | -3.251595000 | -0.915391000 | B                                                                               | 0.896280000  | 4.192546000  |
| B                                                     | -0.154954000 | 1.497861000  | -0.559726000 | B                                                                               | -0.399543000 | -0.681676000 |
| B                                                     | -1.152282000 | 3.765795000  | -0.743020000 | B                                                                               | -0.949198000 | -2.983772000 |
| B                                                     | 1.318049000  | 3.445074000  | -1.096880000 | B                                                                               | -2.660426000 | -1.155603000 |
| B                                                     | 2.347340000  | 1.171291000  | -0.975636000 | B                                                                               | -2.146546000 | 1.165477000  |
| B                                                     | 3.332556000  | -1.218111000 | -1.152454000 | B                                                                               | -1.498035000 | 3.620789000  |
| B                                                     | 5.670752000  | -1.516719000 | -1.956859000 | B                                                                               | -3.088090000 | 5.450401000  |
| B                                                     | 4.731748000  | 0.797490000  | -1.602401000 | B                                                                               | -3.738964000 | 3.037288000  |
| B                                                     | 3.772228000  | 3.127350000  | -1.560097000 | B                                                                               | -4.340719000 | 0.680825000  |
| B                                                     | 2.769482000  | 5.425072000  | -1.594833000 | B                                                                               | -4.923617000 | -1.675674000 |
| N                                                     | -3.615323000 | -5.373998000 | -0.603193000 | N                                                                               | 6.443448000  | 2.496382000  |
| N                                                     | -4.549149000 | -3.097595000 | -0.348862000 | N                                                                               | 5.813936000  | 0.141240000  |
| N                                                     | -6.419557000 | 1.491031000  | -0.073110000 | N                                                                               | 4.534007000  | -4.559847000 |
| N                                                     | -3.960213000 | 1.200826000  | -0.261585000 | N                                                                               | 2.787850000  | -2.798040000 |
| N                                                     | -3.025836000 | -1.111717000 | -0.329849000 | N                                                                               | 3.421873000  | -0.456576000 |
| N                                                     | -2.071957000 | -3.442864000 | -0.517942000 | N                                                                               | 4.059484000  | 1.930649000  |
| N                                                     | 0.439502000  | -3.752570000 | -0.722891000 | N                                                                               | 2.259058000  | 3.718915000  |
| N                                                     | -0.604206000 | -1.496366000 | -0.234580000 | N                                                                               | 1.702140000  | 1.257252000  |
| N                                                     | -1.466542000 | 0.884412000  | -0.365094000 | N                                                                               | 0.999314000  | -1.035363000 |
| N                                                     | -2.457044000 | 3.192854000  | -0.508661000 | N                                                                               | 0.409109000  | -3.382489000 |
| N                                                     | 0.002319000  | 2.900461000  | -0.813931000 | N                                                                               | -1.331482000 | -1.603113000 |
| N                                                     | 2.118476000  | -1.857893000 | -0.687647000 | N                                                                               | -0.208972000 | 3.268407000  |
| N                                                     | 4.392788000  | -2.092340000 | -1.597851000 | N                                                                               | -1.775951000 | 5.034754000  |
| N                                                     | 3.451885000  | 0.235421000  | -1.185832000 | N                                                                               | -2.447271000 | 2.597248000  |
| N                                                     | 2.474914000  | 2.578581000  | -1.221957000 | N                                                                               | -3.029027000 | 0.240554000  |
| N                                                     | 1.468326000  | 4.872946000  | -1.288439000 | N                                                                               | -3.613173000 | -2.118871000 |
| N                                                     | 3.881459000  | 4.548373000  | -1.728436000 | N                                                                               | -5.250413000 | -0.295746000 |
| N                                                     | 4.869332000  | 2.218605000  | -1.716818000 | N                                                                               | -4.663530000 | 2.071339000  |
| N                                                     | 5.810070000  | -0.104700000 | -1.913639000 | N                                                                               | -4.036509000 | 4.448361000  |
| B                                                     | 0.213453000  | -5.178226000 | -0.931223000 | B                                                                               | 3.305373000  | 4.719925000  |
| B                                                     | 2.643488000  | -5.516149000 | -1.516498000 | B                                                                               | 1.632596000  | 6.575288000  |
| B                                                     | 4.168263000  | -3.517816000 | -1.668182000 | B                                                                               | -0.746671000 | 6.003488000  |
| N                                                     | -1.116790000 | -5.700535000 | -0.827692000 | N                                                                               | 4.666466000  | 4.297125000  |
| N                                                     | 1.338275000  | -6.013610000 | -1.261436000 | N                                                                               | 2.940131000  | 6.112529000  |
| N                                                     | 2.877039000  | -4.096398000 | -1.370918000 | N                                                                               | 0.590331000  | 5.597977000  |
| B                                                     | -3.611064000 | 4.070609000  | -0.441185000 | B                                                                               | 0.779127000  | -4.774714000 |
| B                                                     | 0.321957000  | 5.738574000  | -1.182496000 | B                                                                               | -3.257606000 | -3.510956000 |
| N                                                     | -4.906482000 | 3.494321000  | -0.249866000 | N                                                                               | 2.141735000  | -5.153006000 |
| N                                                     | -0.982553000 | 5.194268000  | -0.915747000 | N                                                                               | -1.938050000 | -3.950880000 |
| B                                                     | -2.131987000 | 6.065267000  | -0.822124000 | B                                                                               | -1.573239000 | -5.344542000 |

|                                                                                  |              |              |              |                                                                                              |              |              |              |
|----------------------------------------------------------------------------------|--------------|--------------|--------------|----------------------------------------------------------------------------------------------|--------------|--------------|--------------|
| N                                                                                | -3.405866000 | 5.486980000  | -0.581444000 | N                                                                                            | -0.238787000 | -5.723557000 | -2.243483000 |
| Si                                                                               | 0.936573000  | -0.883855000 | -0.007690000 | Si                                                                                           | 0.082439000  | 1.652223000  | -0.043167000 |
| N                                                                                | 1.053159000  | 0.701532000  | -0.531848000 | N                                                                                            | -0.901369000 | 0.636836000  | -0.942595000 |
| H                                                                                | 6.585236000  | -2.213673000 | -2.287354000 | H                                                                                            | -3.365004000 | 6.611477000  | -1.649877000 |
| H                                                                                | 5.063445000  | -4.235039000 | -2.007191000 | H                                                                                            | -0.996129000 | 7.170196000  | -0.921350000 |
| H                                                                                | 3.524480000  | -6.253577000 | -1.849909000 | H                                                                                            | 1.403986000  | 7.747156000  | -0.328007000 |
| H                                                                                | 1.189758000  | -7.005251000 | -1.384208000 | H                                                                                            | 3.660287000  | 6.809277000  | 0.188110000  |
| H                                                                                | -1.251017000 | -6.694550000 | -0.950888000 | H                                                                                            | 5.375538000  | 5.004745000  | 0.379376000  |
| H                                                                                | -3.781773000 | -6.367574000 | -0.674334000 | H                                                                                            | 7.171796000  | 3.171087000  | 0.401739000  |
| H                                                                                | -5.847555000 | -4.994108000 | -0.397687000 | H                                                                                            | 7.977293000  | 0.818558000  | 0.180565000  |
| H                                                                                | -6.785410000 | -2.677612000 | -0.161658000 | H                                                                                            | 7.324009000  | -1.570429000 | -0.246389000 |
| H                                                                                | -7.748426000 | -0.354943000 | 0.013088000  | H                                                                                            | 6.684654000  | -3.969017000 | -0.694104000 |
| H                                                                                | -7.228243000 | 2.092183000  | -0.004972000 | H                                                                                            | 4.806481000  | -5.527775000 | -1.239616000 |
| H                                                                                | -5.709049000 | 4.106159000  | -0.202591000 | H                                                                                            | 2.401267000  | -6.124749000 | -1.745553000 |
| H                                                                                | -4.199054000 | 6.109579000  | -0.525253000 | H                                                                                            | 0.002181000  | -6.700452000 | -2.329535000 |
| H                                                                                | -2.013564000 | 7.249318000  | -0.952100000 | H                                                                                            | -2.377481000 | -6.165990000 | -2.883871000 |
| H                                                                                | 0.455758000  | 6.918605000  | -1.328786000 | H                                                                                            | -4.065837000 | -4.309603000 | -3.192757000 |
| H                                                                                | 2.910766000  | 6.604079000  | -1.744880000 | H                                                                                            | -5.727468000 | -2.459857000 | -3.569373000 |
| H                                                                                | 4.777648000  | 4.960460000  | -1.945168000 | H                                                                                            | -6.172154000 | -0.011041000 | -3.357878000 |
| H                                                                                | 5.770255000  | 2.592408000  | -1.981191000 | H                                                                                            | -5.563935000 | 2.392440000  | -2.724911000 |
| H                                                                                | 6.705149000  | 0.279770000  | -2.181126000 | H                                                                                            | -4.939203000 | 4.756134000  | -2.220625000 |
| N                                                                                | 1.233868000  | -0.931688000 | 1.842553000  | N                                                                                            | -0.143836000 | 1.574758000  | 1.801423000  |
| N                                                                                | 1.442893000  | -0.016039000 | 2.538582000  | N                                                                                            | -0.603810000 | 0.851737000  | 2.593633000  |
| B                                                                                | 1.708087000  | 0.171411000  | 4.156070000  | B                                                                                            | -1.417945000 | -0.611363000 | 2.663796000  |
| Cl                                                                               | 1.648275000  | -1.477685000 | 4.932903000  | C                                                                                            | -1.831565000 | -0.797812000 | 4.219444000  |
| Cl                                                                               | 3.361929000  | 0.950238000  | 4.190920000  | C                                                                                            | -3.144336000 | -1.066782000 | 4.620468000  |
| Cl                                                                               | 0.333006000  | 1.273842000  | 4.644936000  | C                                                                                            | -0.854786000 | -0.742100000 | 5.224195000  |
|                                                                                  |              |              |              | C                                                                                            | -3.471350000 | -1.269575000 | 5.960987000  |
|                                                                                  |              |              |              | C                                                                                            | -1.170026000 | -0.928234000 | 6.564908000  |
|                                                                                  |              |              |              | C                                                                                            | -2.486059000 | -1.196179000 | 6.938677000  |
|                                                                                  |              |              |              | C                                                                                            | -2.718112000 | -0.381201000 | 1.714473000  |
|                                                                                  |              |              |              | C                                                                                            | -3.327923000 | -1.415619000 | 0.991416000  |
|                                                                                  |              |              |              | C                                                                                            | -3.411602000 | 0.840058000  | 1.756070000  |
|                                                                                  |              |              |              | C                                                                                            | -4.581046000 | -1.262278000 | 0.400788000  |
|                                                                                  |              |              |              | C                                                                                            | -4.641888000 | 1.019466000  | 1.130702000  |
|                                                                                  |              |              |              | C                                                                                            | -5.245540000 | -0.043441000 | 0.466093000  |
|                                                                                  |              |              |              | C                                                                                            | -0.266731000 | -1.690324000 | 2.261564000  |
|                                                                                  |              |              |              | C                                                                                            | 1.108962000  | -1.413414000 | 2.228254000  |
|                                                                                  |              |              |              | C                                                                                            | -0.628418000 | -3.036339000 | 2.084803000  |
|                                                                                  |              |              |              | C                                                                                            | 2.061846000  | -2.405395000 | 2.009398000  |
|                                                                                  |              |              |              | C                                                                                            | 0.311680000  | -4.029837000 | 1.827103000  |
|                                                                                  |              |              |              | C                                                                                            | 1.667475000  | -3.719473000 | 1.788732000  |
|                                                                                  |              |              |              | H                                                                                            | -4.500873000 | -1.479911000 | 6.239220000  |
|                                                                                  |              |              |              | H                                                                                            | -2.736884000 | -1.349693000 | 7.984808000  |
|                                                                                  |              |              |              | H                                                                                            | -0.390309000 | -0.872842000 | 7.320099000  |
|                                                                                  |              |              |              | H                                                                                            | -0.017280000 | -5.054330000 | 1.674837000  |
|                                                                                  |              |              |              | H                                                                                            | 2.407189000  | -4.490646000 | 1.593681000  |
|                                                                                  |              |              |              | H                                                                                            | 3.117286000  | -2.144978000 | 2.001004000  |
|                                                                                  |              |              |              | H                                                                                            | -5.028527000 | -2.098806000 | -0.128165000 |
|                                                                                  |              |              |              | H                                                                                            | -6.214683000 | 0.079986000  | -0.008061000 |
|                                                                                  |              |              |              | H                                                                                            | -5.137794000 | 1.984976000  | 1.182570000  |
|                                                                                  |              |              |              | H                                                                                            | -3.931651000 | -1.119194000 | 3.872938000  |
|                                                                                  |              |              |              | H                                                                                            | 0.182059000  | -0.555624000 | 4.948421000  |
|                                                                                  |              |              |              | H                                                                                            | -1.668293000 | -3.329482000 | 2.191819000  |
|                                                                                  |              |              |              | H                                                                                            | 1.473325000  | -0.401927000 | 2.392183000  |
|                                                                                  |              |              |              | H                                                                                            | -2.999966000 | 1.674597000  | 2.320574000  |
|                                                                                  |              |              |              | H                                                                                            | -2.828779000 | -2.372440000 | 0.886487000  |
| <b>B(C<sub>6</sub>H<sub>4</sub>F)<sub>3</sub>-N<sub>2</sub>-Si<sub>B</sub>BN</b> |              |              |              | <b>B(C<sub>6</sub>H<sub>3</sub>F<sub>2</sub>)<sub>3</sub>-N<sub>2</sub>-Si<sub>B</sub>BN</b> |              |              |              |

|    |              |              |              |    |              |              |              |
|----|--------------|--------------|--------------|----|--------------|--------------|--------------|
| N  | 5.499438000  | -1.543574000 | -0.719754000 | N  | 3.552971000  | 2.057365000  | 3.013860000  |
| B  | 6.023467000  | -2.869592000 | -0.966451000 | B  | 3.914112000  | 3.441635000  | 3.209696000  |
| B  | 6.371073000  | -0.486903000 | -0.288371000 | B  | 4.531243000  | 1.014634000  | 3.167499000  |
| B  | 6.742456000  | 1.904558000  | 0.348497000  | B  | 5.161196000  | -1.408582000 | 3.121581000  |
| B  | 4.813835000  | 3.505991000  | 0.418245000  | B  | 3.461135000  | -3.150911000 | 2.507234000  |
| B  | 4.433412000  | 1.093901000  | -0.189671000 | B  | 2.816812000  | -0.712319000 | 2.587763000  |
| B  | 4.084523000  | -1.289023000 | -0.911337000 | B  | 2.191236000  | 1.724000000  | 2.642988000  |
| B  | 3.727437000  | -3.657408000 | -1.601579000 | B  | 1.549648000  | 4.132460000  | 2.715201000  |
| B  | 1.783838000  | -2.073260000 | -1.541473000 | B  | -0.138291000 | 2.427749000  | 2.006543000  |
| B  | 2.135650000  | 0.235384000  | -0.674863000 | B  | 0.545785000  | 0.037533000  | 1.896004000  |
| B  | 2.502228000  | 2.669823000  | 0.004013000  | B  | 1.191527000  | -2.434506000 | 1.810119000  |
| B  | 0.550558000  | 4.365210000  | -0.155345000 | B  | -0.525394000 | -4.197817000 | 0.998518000  |
| B  | -0.189495000 | -0.550218000 | -1.454773000 | B  | -1.808554000 | 0.789927000  | 1.140313000  |
| B  | -0.454706000 | -2.836929000 | -2.380538000 | B  | -2.498598000 | 3.142763000  | 1.503869000  |
| B  | -2.339730000 | -1.185158000 | -2.553815000 | B  | -4.191417000 | 1.432327000  | 0.768761000  |
| B  | -2.109355000 | 1.120571000  | -1.628594000 | B  | -3.531281000 | -0.952960000 | 0.411949000  |
| B  | -1.740105000 | 3.596171000  | -0.977742000 | B  | -2.886838000 | -3.464124000 | 0.338984000  |
| B  | -3.497012000 | 5.282821000  | -1.508978000 | B  | -4.670972000 | -5.174326000 | 0.033893000  |
| B  | -3.873896000 | 2.841568000  | -2.019043000 | B  | -5.237356000 | -2.714782000 | -0.037241000 |
| B  | -4.191007000 | 0.485530000  | -2.837421000 | B  | -5.917154000 | -0.292168000 | 0.144516000  |
| B  | -4.488320000 | -1.866410000 | -3.646712000 | B  | -6.572480000 | 2.116266000  | 0.399762000  |
| N  | 6.211595000  | 3.207860000  | 0.557175000  | N  | 4.790701000  | -2.766098000 | 2.893550000  |
| N  | 5.851912000  | 0.834790000  | -0.039463000 | N  | 4.170502000  | -0.368171000 | 2.975923000  |
| N  | 5.135887000  | -3.879973000 | -1.412015000 | N  | 2.909394000  | 4.436817000  | 3.074296000  |
| N  | 3.198710000  | -2.326877000 | -1.371178000 | N  | 1.192152000  | 2.751578000  | 2.470295000  |
| N  | 3.555960000  | 0.023533000  | -0.615091000 | N  | 1.829273000  | 0.341432000  | 2.453498000  |
| N  | 3.916646000  | 2.425327000  | 0.068221000  | N  | 2.476074000  | -2.105716000 | 2.352877000  |
| N  | 1.940277000  | 4.015627000  | 0.128431000  | N  | 0.790064000  | -3.806641000 | 1.495078000  |
| N  | 1.650622000  | 1.522077000  | -0.214667000 | N  | 0.284999000  | -1.343694000 | 1.569302000  |
| N  | 1.227383000  | -0.773749000 | -1.197353000 | N  | -0.465333000 | 1.058352000  | 1.642432000  |
| N  | 0.924365000  | -3.111735000 | -2.067474000 | N  | -1.153589000 | 3.458001000  | 1.919830000  |
| N  | -0.990957000 | -1.519188000 | -2.145029000 | N  | -2.840818000 | 1.785191000  | 1.155739000  |
| N  | -0.441137000 | 3.342645000  | -0.396862000 | N  | -1.477460000 | -3.210087000 | 0.533043000  |
| N  | -2.161784000 | 4.979507000  | -1.044517000 | N  | -3.291159000 | -4.853458000 | 0.323348000  |
| N  | -2.561238000 | 2.506366000  | -1.484220000 | N  | -3.842361000 | -2.368561000 | 0.197316000  |
| N  | -2.861190000 | 0.154123000  | -2.374909000 | N  | -4.547943000 | 0.061206000  | 0.449621000  |
| N  | -3.157970000 | -2.200710000 | -3.189883000 | N  | -5.210234000 | 2.463858000  | 0.735302000  |
| N  | -4.959453000 | -0.536614000 | -3.488936000 | N  | -6.896686000 | 0.758417000  | 0.123152000  |
| N  | -4.669136000 | 1.819296000  | -2.626008000 | N  | -6.217979000 | -1.671081000 | -0.112369000 |
| N  | -4.319938000 | 4.210531000  | -1.940726000 | N  | -5.587269000 | -4.106946000 | -0.164795000 |
| B  | 2.867801000  | 5.105128000  | 0.402748000  | B  | 1.747404000  | -4.861179000 | 1.792758000  |
| B  | 1.025601000  | 6.799563000  | 0.096430000  | B  | 0.010223000  | -6.613569000 | 1.253957000  |
| B  | -1.253539000 | 6.027396000  | -0.643420000 | B  | -2.317117000 | -5.890329000 | 0.586875000  |
| N  | 4.256158000  | 4.812519000  | 0.606196000  | N  | 3.059197000  | -4.505763000 | 2.252093000  |
| N  | 2.359386000  | 6.452001000  | 0.438244000  | N  | 1.327790000  | -6.230058000 | 1.624156000  |
| N  | 0.103564000  | 5.738493000  | -0.238476000 | N  | -0.953776000 | -5.577681000 | 0.952792000  |
| B  | 1.451539000  | -4.442855000 | -2.288689000 | B  | -0.806285000 | 4.832205000  | 2.219623000  |
| B  | -2.653869000 | -3.539694000 | -3.341099000 | B  | -4.861962000 | 3.826977000  | 1.046929000  |
| N  | 2.835168000  | -4.690335000 | -2.030160000 | N  | 0.537606000  | 5.141063000  | 2.599943000  |
| N  | -1.313470000 | -3.866068000 | -2.936173000 | N  | -3.517821000 | 4.172449000  | 1.425517000  |
| B  | -0.797090000 | -5.203686000 | -3.112064000 | B  | -3.168987000 | 5.540748000  | 1.729908000  |
| N  | 0.555951000  | -5.462500000 | -2.770392000 | N  | -1.830955000 | 5.837430000  | 2.102502000  |
| Si | -0.008895000 | 1.747478000  | -0.081000000 | Si | -0.935849000 | -1.626160000 | 0.459503000  |
| N  | -0.843223000 | 0.686188000  | -1.073031000 | N  | -2.175425000 | -0.516101000 | 0.633729000  |
| H  | -3.897600000 | 6.410524000  | -1.533435000 | H  | -5.035849000 | -6.312267000 | -0.034210000 |
| H  | -1.624655000 | 7.164854000  | -0.669531000 | H  | -2.654814000 | -7.036675000 | 0.521884000  |
| H  | 0.677068000  | 7.944449000  | 0.082265000  | H  | -0.291802000 | -7.769985000 | 1.186917000  |
| H  | 2.995312000  | 7.207998000  | 0.649142000  | H  | 1.983913000  | -6.970827000 | 1.827150000  |



|                                                                                              |              |              |              |                                                                                 |              |              |              |
|----------------------------------------------------------------------------------------------|--------------|--------------|--------------|---------------------------------------------------------------------------------|--------------|--------------|--------------|
| H                                                                                            | 4.881042000  | 5.577944000  | 0.817971000  | H                                                                               | 3.730512000  | -5.245344000 | 2.405376000  |
| H                                                                                            | 6.857122000  | 3.939308000  | 0.818317000  | H                                                                               | 5.506894000  | -3.469401000 | 3.004022000  |
| H                                                                                            | 7.913985000  | 1.702060000  | 0.489395000  | H                                                                               | 6.287560000  | -1.140537000 | 3.427326000  |
| H                                                                                            | 7.538813000  | -0.700710000 | -0.135469000 | H                                                                               | 5.657700000  | 1.294931000  | 3.460834000  |
| H                                                                                            | 7.186259000  | -3.103995000 | -0.801672000 | H                                                                               | 5.038099000  | 3.746636000  | 3.489974000  |
| H                                                                                            | 5.514690000  | -4.803806000 | -1.562064000 | H                                                                               | 3.177844000  | 5.397436000  | 3.232034000  |
| H                                                                                            | 3.202950000  | -5.619272000 | -2.178830000 | H                                                                               | 0.781415000  | 6.101759000  | 2.795295000  |
| H                                                                                            | 0.905552000  | -6.398908000 | -2.914661000 | H                                                                               | -1.606121000 | 6.799737000  | 2.310552000  |
| H                                                                                            | -1.495642000 | -6.076985000 | -3.540780000 | H                                                                               | -3.990397000 | 6.410109000  | 1.668464000  |
| H                                                                                            | -3.355231000 | -4.388004000 | -3.812441000 | H                                                                               | -5.701962000 | 4.678560000  | 0.997235000  |
| H                                                                                            | -5.184972000 | -2.699804000 | -4.150923000 | H                                                                               | -7.423601000 | 2.957766000  | 0.362331000  |
| H                                                                                            | -5.904517000 | -0.337040000 | -3.782884000 | H                                                                               | -7.857818000 | 0.544330000  | -0.100737000 |
| H                                                                                            | -5.591815000 | 2.059036000  | -2.960624000 | H                                                                               | -7.177647000 | -1.928675000 | -0.296503000 |
| H                                                                                            | -5.239380000 | 4.443012000  | -2.288704000 | H                                                                               | -6.549487000 | -4.352953000 | -0.349197000 |
| N                                                                                            | -0.344559000 | 1.577427000  | 1.746066000  | N                                                                               | -0.008477000 | -1.351920000 | -1.124747000 |
| N                                                                                            | -0.765380000 | 0.780303000  | 2.486848000  | N                                                                               | 0.155910000  | -0.287326000 | -1.583031000 |
| B                                                                                            | -1.367604000 | -0.797284000 | 2.434215000  | B                                                                               | 1.293888000  | 0.425305000  | -2.522113000 |
| C                                                                                            | -1.817159000 | -1.135227000 | 3.953148000  | C                                                                               | 1.549313000  | 1.835023000  | -1.735435000 |
| C                                                                                            | -3.135522000 | -1.452591000 | 4.298829000  | C                                                                               | 2.799561000  | 2.389772000  | -1.460799000 |
| C                                                                                            | -0.870308000 | -1.146382000 | 4.988528000  | C                                                                               | 0.485846000  | 2.665831000  | -1.378708000 |
| C                                                                                            | -3.504423000 | -1.761497000 | 5.607238000  | C                                                                               | 2.997025000  | 3.631462000  | -0.870743000 |
| C                                                                                            | -1.209667000 | -1.437317000 | 6.304108000  | C                                                                               | 0.612127000  | 3.927479000  | -0.818992000 |
| C                                                                                            | -2.531917000 | -1.743718000 | 6.590892000  | C                                                                               | 1.889292000  | 4.407637000  | -0.557801000 |
| C                                                                                            | -2.641970000 | -0.677635000 | 1.430953000  | C                                                                               | 2.492555000  | -0.672950000 | -2.489673000 |
| C                                                                                            | -3.090364000 | -1.737264000 | 0.630536000  | C                                                                               | 2.930706000  | -1.450421000 | -3.558786000 |
| C                                                                                            | -3.478127000 | 0.450728000  | 1.485629000  | C                                                                               | 3.125275000  | -0.989329000 | -1.287592000 |
| C                                                                                            | -4.313785000 | -1.705550000 | -0.035579000 | C                                                                               | 3.910396000  | -2.433948000 | -3.460564000 |
| C                                                                                            | -4.684270000 | 0.529632000  | 0.796232000  | C                                                                               | 4.097734000  | -1.954525000 | -1.109296000 |
| C                                                                                            | -5.093278000 | -0.567157000 | 0.057785000  | C                                                                               | 4.494573000  | -2.683345000 | -2.227078000 |
| C                                                                                            | -0.046268000 | -1.657960000 | 2.021098000  | C                                                                               | 0.609702000  | 0.750898000  | -3.951383000 |
| C                                                                                            | 1.269694000  | -1.180724000 | 2.131452000  | C                                                                               | -0.688625000 | 0.461533000  | -4.351282000 |
| C                                                                                            | -0.177972000 | -3.016945000 | 1.690502000  | C                                                                               | 1.342695000  | 1.472917000  | -4.891218000 |
| C                                                                                            | 2.384766000  | -1.983316000 | 1.904428000  | C                                                                               | -1.239699000 | 0.843917000  | -5.567036000 |
| C                                                                                            | 0.915778000  | -3.834942000 | 1.421704000  | C                                                                               | 0.860385000  | 1.885219000  | -6.121481000 |
| C                                                                                            | 2.187183000  | -3.300286000 | 1.536530000  | C                                                                               | -0.451654000 | 1.563713000  | -6.455442000 |
| F                                                                                            | -2.874498000 | -2.034757000 | 7.859613000  | F                                                                               | 3.907443000  | 1.703803000  | -1.785837000 |
| F                                                                                            | -6.266900000 | -0.513390000 | -0.601139000 | F                                                                               | -0.777784000 | 2.226059000  | -1.589886000 |
| F                                                                                            | 3.257036000  | -4.080901000 | 1.286122000  | F                                                                               | 2.384520000  | -1.276723000 | -4.774035000 |
| H                                                                                            | -4.528472000 | -2.008882000 | 5.866780000  | F                                                                               | 2.738630000  | -0.303414000 | -0.182590000 |
| H                                                                                            | -0.471769000 | -1.439088000 | 7.099421000  | F                                                                               | -1.490695000 | -0.240216000 | -3.516363000 |
| H                                                                                            | 0.790642000  | -4.877654000 | 1.149851000  | F                                                                               | 2.614968000  | 1.788840000  | -4.580684000 |
| H                                                                                            | 3.392566000  | -1.593336000 | 2.001962000  | H                                                                               | 4.009165000  | 3.972489000  | -0.685608000 |
| H                                                                                            | -4.650481000 | -2.542108000 | -0.637779000 | H                                                                               | 2.018055000  | 5.383437000  | -0.101446000 |
| H                                                                                            | -5.309644000 | 1.414834000  | 0.841841000  | H                                                                               | -0.277996000 | 4.503263000  | -0.594957000 |
| H                                                                                            | 0.171240000  | -0.927497000 | 4.762165000  | H                                                                               | 1.505463000  | 2.444113000  | -6.789547000 |
| H                                                                                            | -3.904204000 | -1.462536000 | 3.531408000  | H                                                                               | -0.860069000 | 1.875506000  | -7.411407000 |
| H                                                                                            | -1.160374000 | -3.476783000 | 1.676262000  | H                                                                               | -2.265843000 | 0.577817000  | -5.793246000 |
| H                                                                                            | 1.463166000  | -0.150420000 | 2.416532000  | H                                                                               | 4.191411000  | -2.985741000 | -4.350358000 |
| H                                                                                            | -3.201490000 | 1.299093000  | 2.107678000  | H                                                                               | 5.258659000  | -3.448426000 | -2.133688000 |
| H                                                                                            | -2.484281000 | -2.627645000 | 0.512514000  | H                                                                               | 4.528571000  | -2.113040000 | -0.126337000 |
| <b>B(C<sub>6</sub>H<sub>3</sub>F<sub>3</sub>)<sub>3</sub>-N<sub>2</sub>-Si<sub>B</sub>BN</b> |              |              |              | <b>B(C<sub>6</sub>F<sub>5</sub>)<sub>3</sub>-N<sub>2</sub>-Si<sub>B</sub>BN</b> |              |              |              |
| N                                                                                            | 1.343012000  | -4.276277000 | -2.787997000 | N                                                                               | 1.280248000  | -3.151896000 | -3.747577000 |
| B                                                                                            | 0.452110000  | -5.340021000 | -3.185840000 | B                                                                               | 0.565832000  | -4.348080000 | -4.134569000 |
| B                                                                                            | 2.747809000  | -4.531219000 | -2.610430000 | B                                                                               | 2.715942000  | -3.087828000 | -3.837882000 |
| B                                                                                            | 5.027951000  | -3.767219000 | -1.917896000 | B                                                                               | 4.866211000  | -1.826310000 | -3.565315000 |
| B                                                                                            | 5.390143000  | -1.416812000 | -1.117962000 | B                                                                               | 4.864758000  | 0.478232000  | -2.579773000 |
| B                                                                                            | 3.083909000  | -2.199478000 | -1.764715000 | B                                                                               | 2.695345000  | -0.754071000 | -2.941158000 |
| B                                                                                            | 0.791286000  | -2.978497000 | -2.448844000 | B                                                                               | 0.534649000  | -2.001222000 | -3.283503000 |

|    |              |              |               |    |              |              |              |
|----|--------------|--------------|---------------|----|--------------|--------------|--------------|
| B  | -1.516508000 | -3.788125000 | -2.951712000  | B  | -1.621214000 | -3.188842000 | -3.696069000 |
| B  | -1.166473000 | -1.407184000 | -2.275888000  | B  | -1.647645000 | -0.908073000 | -2.665387000 |
| B  | 1.110988000  | -0.686664000 | -1.557739000  | B  | 0.519922000  | 0.231762000  | -2.227586000 |
| B  | 3.442199000  | 0.111275000  | -0.880066000  | B  | 2.722498000  | 1.465786000  | -1.809524000 |
| B  | 3.831433000  | 2.601325000  | -0.270031000  | B  | 2.712533000  | 3.759393000  | -0.599940000 |
| B  | -0.860272000 | 0.977035000  | -1.628220000  | B  | -1.720732000 | 1.275123000  | -1.462448000 |
| B  | -3.097483000 | 0.200459000  | -2.356262000  | B  | -3.846310000 | 0.202556000  | -2.151535000 |
| B  | -2.700710000 | 2.637351000  | -1.870880000  | B  | -3.872732000 | 2.460258000  | -1.033873000 |
| B  | -0.469716000 | 3.442135000  | -1.092633000  | B  | -1.743688000 | 3.574679000  | -0.339583000 |
| B  | 1.886984000  | 4.260355000  | -0.393199000  | B  | 0.488159000  | 4.821220000  | 0.105421000  |
| B  | 2.333529000  | 6.707846000  | -0.282356000  | B  | 0.426168000  | 7.214511000  | 0.789352000  |
| B  | 0.000698000  | 5.862055000  | -0.746291000  | B  | -1.719636000 | 5.913095000  | 0.516836000  |
| B  | -2.304621000 | 5.085754000  | -1.425387000  | B  | -3.904076000 | 4.762830000  | -0.010165000 |
| B  | -4.591710000 | 4.267416000  | -2.057443000  | B  | -6.052354000 | 3.617715000  | -0.618687000 |
| N  | 5.875607000  | -2.731370000 | -1.430141000  | N  | 5.545704000  | -0.641603000 | -3.163005000 |
| N  | 3.621703000  | -3.499750000 | -2.108167000  | N  | 3.424594000  | -1.889145000 | -3.464223000 |
| N  | -0.945513000 | -5.083804000 | -3.221015000  | N  | -0.854643000 | -4.330254000 | -4.113658000 |
| N  | -0.621315000 | -2.711727000 | -2.580689000  | N  | -0.907784000 | -2.021605000 | -3.214894000 |
| N  | 1.670761000  | -1.942949000 | -1.958791000  | N  | 1.245309000  | -0.812087000 | -2.882313000 |
| N  | 3.973206000  | -1.165937000 | -1.262383000  | N  | 3.421991000  | 0.420268000  | -2.490127000 |
| N  | 4.294728000  | 1.231267000  | -0.475172000  | N  | 3.389720000  | 2.641622000  | -1.249452000 |
| N  | 2.011897000  | 0.261862000  | -0.939860000  | N  | 1.295116000  | 1.318667000  | -1.677630000 |
| N  | -0.293342000 | -0.357444000 | -1.775972000  | N  | -0.930349000 | 0.211645000  | -2.072959000 |
| N  | -2.571621000 | -1.136217000 | -2.483367000  | N  | -3.092473000 | -0.903132000 | -2.691727000 |
| N  | -2.208815000 | 1.282091000  | -2.005158000  | N  | -3.147655000 | 1.321303000  | -1.562062000 |
| N  | 2.419865000  | 2.922366000  | -0.230512000  | N  | 1.314827000  | 3.674810000  | -0.214457000 |
| N  | 2.828973000  | 5.349045000  | -0.255560000  | N  | 1.186954000  | 6.060298000  | 0.362023000  |
| N  | 0.477241000  | 4.486865000  | -0.698831000  | N  | -0.968933000 | 4.724396000  | 0.131398000  |
| N  | -1.817475000 | 3.726628000  | -1.494254000  | N  | -3.172272000 | 3.601170000  | -0.468249000 |
| N  | -4.100773000 | 2.909472000  | -2.136758000  | N  | -5.319368000 | 2.469854000  | -1.103448000 |
| N  | -3.690569000 | 5.318261000  | -1.724542000  | N  | -5.336730000 | 4.731142000  | -0.093402000 |
| N  | -1.375381000 | 6.117818000  | -1.061112000  | N  | -3.152628000 | 5.877764000  | 0.491163000  |
| N  | 0.944078000  | 6.920797000  | -0.489180000  | N  | -0.985779000 | 7.095872000  | 0.888607000  |
| B  | 5.729352000  | 0.985300000  | -0.423260000  | B  | 4.827146000  | 2.746774000  | -1.467651000 |
| B  | 6.164457000  | 3.439912000  | -0.031104000  | B  | 4.809407000  | 5.096198000  | -0.539951000 |
| B  | 4.236144000  | 5.063663000  | -0.085519000  | B  | 2.621505000  | 6.130474000  | 0.185560000  |
| N  | 6.225305000  | -0.336440000 | -0.676338000  | N  | 5.522142000  | 1.656491000  | -2.085652000 |
| N  | 6.605262000  | 2.093911000  | -0.140358000  | N  | 5.487835000  | 3.961841000  | -1.061069000 |
| N  | 4.747319000  | 3.7111755000 | -0.128266000  | N  | 3.381256000  | 5.007834000  | -0.317827000 |
| B  | -3.468645000 | -2.220641000 | -2.826039000  | B  | -3.805340000 | -2.042016000 | -3.240728000 |
| B  | -4.990527000 | 1.827711000  | -2.486165000  | B  | -6.018778000 | 1.342062000  | -1.669593000 |
| N  | -2.920637000 | -3.527109000 | -3.036029000  | N  | -3.050822000 | -3.156693000 | -3.723460000 |
| N  | -4.501898000 | 0.480408000  | -2.585330000  | N  | -5.293936000 | 0.215133000  | -2.191199000 |
| B  | -5.403570000 | -0.614902000 | -2.863358000  | B  | -5.996920000 | -0.913241000 | -2.761374000 |
| N  | -4.871201000 | -1.927943000 | -2.962865000  | N  | -5.241870000 | -1.997973000 | -3.276881000 |
| Si | 1.332124000  | 1.646737000  | -0.282838000  | Si | 0.556374000  | 2.206693000  | -0.472058000 |
| N  | -0.065864000 | 2.062423000  | -1.102193000  | N  | -1.085206000 | 2.354169000  | -0.734851000 |
| H  | 3.077802000  | 7.633408000  | -0.134329000  | H  | 0.972305000  | 8.247355000  | 1.047530000  |
| H  | 5.001674000  | 5.970661000  | 0.066933000   | H  | 3.189329000  | 7.152906000  | 0.437392000  |
| H  | 6.950286000  | 4.327466000  | 0.133774000   | H  | 5.405429000  | 6.102515000  | -0.286989000 |
| H  | 7.600279000  | 1.928466000  | -0.085177000  | H  | 6.483879000  | 4.047693000  | -1.206599000 |
| H  | 7.221565000  | -0.493377000 | -0.6111703000 | H  | 6.525601000  | 1.723898000  | -2.184917000 |
| H  | 6.856519000  | -2.944768000 | -1.319944000  | H  | 6.553239000  | -0.638406000 | -3.230245000 |
| H  | 5.484216000  | -4.844802000 | -2.170372000  | H  | 5.484761000  | -2.758221000 | -3.992065000 |
| H  | 3.198078000  | -5.603484000 | -2.889670000  | H  | 3.326869000  | -4.037294000 | -4.234537000 |
| H  | 0.877832000  | -6.425061000 | -3.460020000  | H  | 1.157349000  | -5.327887000 | -4.483839000 |
| H  | -1.552576000 | -5.843310000 | -3.494505000  | H  | -1.336632000 | -5.172859000 | -4.392048000 |
| H  | -3.544184000 | -4.283564000 | -3.280009000  | H  | -3.546769000 | -3.977539000 | -4.040644000 |

|   |              |              |              |   |              |              |              |
|---|--------------|--------------|--------------|---|--------------|--------------|--------------|
| H | -5.515573000 | -2.677044000 | -3.171355000 | H | -5.749707000 | -2.782447000 | -3.659592000 |
| H | -6.573691000 | -0.418555000 | -3.020819000 | H | -7.193336000 | -0.928763000 | -2.803369000 |
| H | -6.148393000 | 2.057007000  | -2.685118000 | H | -7.214713000 | 1.350648000  | -1.712268000 |
| H | -5.744975000 | 4.509027000  | -2.270593000 | H | -7.248214000 | 3.639936000  | -0.665344000 |
| H | -4.065746000 | 6.254540000  | -1.674335000 | H | -5.876541000 | 5.520854000  | 0.230436000  |
| H | -1.697892000 | 7.075525000  | -1.051540000 | H | -3.655600000 | 6.704408000  | 0.782795000  |
| H | 0.622433000  | 7.878137000  | -0.511660000 | H | -1.498452000 | 7.918433000  | 1.173342000  |
| N | 0.831152000  | 1.107853000  | 1.446992000  | N | 0.852008000  | 1.051027000  | 0.976220000  |
| N | -0.065775000 | 0.351710000  | 1.448885000  | N | 0.131681000  | 0.170063000  | 1.247086000  |
| B | -0.826873000 | -0.823495000 | 2.216021000  | B | 0.314195000  | -1.286453000 | 1.956578000  |
| C | -2.389033000 | -0.676769000 | 1.802335000  | C | -0.422641000 | -2.282000000 | 0.882456000  |
| C | -3.293832000 | -1.702039000 | 2.071701000  | C | 0.118508000  | -3.453453000 | 0.359729000  |
| C | -2.980719000 | 0.438054000  | 1.218706000  | C | -1.761844000 | -2.059091000 | 0.558235000  |
| C | -4.629532000 | -1.706038000 | 1.704129000  | C | -0.612060000 | -4.348096000 | -0.416109000 |
| C | -4.308562000 | 0.526621000  | 0.825887000  | C | -2.539536000 | -2.955157000 | -0.160082000 |
| C | -5.107540000 | -0.577384000 | 1.057715000  | C | -1.956688000 | -4.113752000 | -0.651868000 |
| C | 0.006941000  | -2.071284000 | 1.545509000  | C | 1.925059000  | -1.429269000 | 2.132362000  |
| C | 1.374365000  | -2.216602000 | 1.803493000  | C | 2.607347000  | -1.482257000 | 3.343544000  |
| C | -0.500460000 | -3.084295000 | 0.730647000  | C | 2.743525000  | -1.403790000 | 1.005317000  |
| C | 2.175669000  | -3.260972000 | 1.370019000  | C | 3.997994000  | -1.521238000 | 3.429457000  |
| C | 0.217651000  | -4.190382000 | 0.298242000  | C | 4.125148000  | -1.431561000 | 1.040830000  |
| C | 1.556101000  | -4.255901000 | 0.634894000  | C | 4.761838000  | -1.492436000 | 2.273930000  |
| C | -0.627600000 | -0.645728000 | 3.816106000  | C | -0.559234000 | -1.282460000 | 3.321622000  |
| C | -0.828659000 | 0.588833000  | 4.429975000  | C | -1.210554000 | -0.189743000 | 3.875022000  |
| C | -0.340290000 | -1.675308000 | 4.710043000  | C | -0.731646000 | -2.488210000 | 3.994871000  |
| C | -0.738542000 | 0.832478000  | 5.791382000  | C | -1.993047000 | -0.274008000 | 5.020994000  |
| C | -0.235274000 | -1.518683000 | 6.085618000  | C | -1.498445000 | -2.617276000 | 5.142250000  |
| C | -0.435821000 | -0.250126000 | 6.600365000  | C | -2.138358000 | -1.496844000 | 5.657833000  |
| F | -6.383820000 | -0.549805000 | 0.650618000  | F | -2.678422000 | -4.989371000 | -1.346939000 |
| F | -2.833377000 | -2.788643000 | 2.714045000  | F | -0.033239000 | -5.440812000 | -0.911639000 |
| F | -2.232952000 | 1.542631000  | 0.993109000  | F | 1.383423000  | -3.803108000 | 0.610627000  |
| F | 1.987629000  | -1.265788000 | 2.532541000  | F | -2.379460000 | -0.942626000 | 0.979392000  |
| F | 2.282299000  | -5.297834000 | 0.206778000  | F | -3.833115000 | -2.713242000 | -0.379579000 |
| F | -1.767382000 | -3.021090000 | 0.288337000  | F | 1.958410000  | -1.483739000 | 4.512011000  |
| F | -0.338872000 | -0.063452000 | 7.923389000  | F | 4.597020000  | -1.571664000 | 4.617516000  |
| F | -1.137924000 | 1.640951000  | 3.645952000  | F | 6.088834000  | -1.518510000 | 2.341671000  |
| F | -0.152370000 | -2.919105000 | 4.240877000  | F | 4.843308000  | -1.395978000 | -0.083828000 |
| H | -5.266425000 | -2.556258000 | 1.911637000  | F | 2.174963000  | -1.333472000 | -0.211803000 |
| H | -4.694484000 | 1.424432000  | 0.360549000  | F | -2.881448000 | -1.596976000 | 6.755976000  |
| H | -0.007589000 | -2.360694000 | 6.726814000  | F | -2.601224000 | 0.807297000  | 5.507413000  |
| H | -0.902046000 | 1.821190000  | 6.200454000  | F | -1.109638000 | 1.026219000  | 3.310820000  |
| H | 3.230176000  | -3.300011000 | 1.611398000  | F | -1.626602000 | -3.795053000 | 5.750340000  |
| H | -0.254215000 | -4.950529000 | -0.311232000 | F | -0.119143000 | -3.589476000 | 3.537529000  |

Table S8. Cartesian coordinates of optimized geometries of halogen bond donors augmented N<sub>2</sub>-Si<sub>B</sub>BN systems calculated at the  $\omega$ B97X-D/6-31G(d) level of theory.

| XB1-N <sub>2</sub> -Si <sub>B</sub> BN |              |             |              | XB2-N <sub>2</sub> -Si <sub>B</sub> BN |             |              |              |
|----------------------------------------|--------------|-------------|--------------|----------------------------------------|-------------|--------------|--------------|
| N                                      | -3.890840000 | 3.937158000 | -1.502762000 | N                                      | 3.623314000 | -1.814887000 | -4.594090000 |
| B                                      | -4.920631000 | 4.009477000 | -2.515971000 | B                                      | 4.301444000 | -1.139023000 | -5.679148000 |
| B                                      | -3.455367000 | 5.130183000 | -0.828154000 | B                                      | 3.225457000 | -3.189827000 | -4.733640000 |
| B                                      | -2.045557000 | 6.261165000 | 0.898922000  | B                                      | 2.231661000 | -5.275134000 | -3.773777000 |
| B                                      | -0.446366000 | 4.926700000 | 2.293804000  | B                                      | 1.314766000 | -5.279176000 | -1.440219000 |
| B                                      | -1.832576000 | 3.791418000 | 0.527407000  | B                                      | 2.274810000 | -3.167909000 | -2.419229000 |
| B                                      | -3.316480000 | 2.654072000 | -1.155563000 | B                                      | 3.365698000 | -1.104486000 | -3.359653000 |

|    |              |              |              |    |              |              |              |
|----|--------------|--------------|--------------|----|--------------|--------------|--------------|
| B  | -4.826733000 | 1.513972000  | -2.783534000 | B  | 4.514505000  | 0.921116000  | -4.257690000 |
| B  | -3.238527000 | 0.151124000  | -1.397242000 | B  | 3.574645000  | 0.956462000  | -1.930733000 |
| B  | -1.645785000 | 1.328903000  | 0.126415000  | B  | 2.320819000  | -1.039803000 | -1.104764000 |
| B  | -0.175654000 | 2.484154000  | 1.870067000  | B  | 1.261796000  | -3.158190000 | -0.132590000 |
| B  | 1.262353000  | 1.069936000  | 3.497044000  | B  | 0.526691000  | -3.218527000 | 2.353038000  |
| B  | -1.697978000 | -1.250632000 | -0.017119000 | B  | 2.659918000  | 1.039879000  | 0.393229000  |
| B  | -3.392027000 | -2.359184000 | -1.462322000 | B  | 4.037555000  | 2.933080000  | -0.443721000 |
| B  | -1.974158000 | -3.733835000 | 0.094896000  | B  | 3.267890000  | 2.900228000  | 1.951426000  |
| B  | -0.298927000 | -2.648000000 | 1.600686000  | B  | 1.935311000  | 0.983598000  | 2.847444000  |
| B  | 1.191289000  | -1.482002000 | 3.369709000  | B  | 0.861334000  | -1.158395000 | 3.835145000  |
| B  | 2.183305000  | -2.838703000 | 5.212983000  | B  | 0.563216000  | -1.348196000 | 6.302644000  |
| B  | 0.874818000  | -3.957634000 | 3.371405000  | B  | 1.450039000  | 0.782958000  | 5.287108000  |
| B  | -0.667049000 | -5.109926000 | 1.746292000  | B  | 2.626211000  | 2.819709000  | 4.384147000  |
| B  | -2.267902000 | -6.221516000 | 0.169391000  | B  | 3.883418000  | 4.789826000  | 3.478214000  |
| N  | -1.065561000 | 6.167036000  | 1.925538000  | N  | 1.622574000  | -5.941827000 | -2.674018000 |
| N  | -2.439114000 | 5.062270000  | 0.191143000  | N  | 2.570593000  | -3.874167000 | -3.646689000 |
| N  | -5.347010000 | 2.806427000  | -3.136718000 | N  | 4.716885000  | 0.204436000  | -5.486753000 |
| N  | -3.772353000 | 1.438526000  | -1.786468000 | N  | 3.797261000  | 0.260913000  | -3.179476000 |
| N  | -2.267754000 | 2.589833000  | -0.161942000 | N  | 2.659013000  | -1.773439000 | -2.289127000 |
| N  | -0.819048000 | 3.730552000  | 1.564088000  | N  | 1.620186000  | -3.865822000 | -1.327289000 |
| N  | 0.758115000  | 2.341956000  | 2.987497000  | N  | 0.707772000  | -3.833036000 | 1.041438000  |
| N  | -0.515065000 | 1.351467000  | 1.032638000  | N  | 1.496810000  | -1.727002000 | -0.128337000 |
| N  | -2.130741000 | 0.076868000  | -0.449301000 | N  | 2.786224000  | 0.325097000  | -0.874985000 |
| N  | -3.807520000 | -1.062459000 | -1.941837000 | N  | 4.135357000  | 2.273468000  | -1.724213000 |
| N  | -2.358361000 | -2.446428000 | -0.455614000 | N  | 3.325114000  | 2.286207000  | 0.636099000  |
| N  | 1.035602000  | -0.168176000 | 2.778010000  | N  | 0.697814000  | -1.790382000 | 2.540331000  |
| N  | 1.906893000  | -1.546497000 | 4.623109000  | N  | 0.523394000  | -1.956668000 | 4.989445000  |
| N  | 0.630136000  | -2.668455000 | 2.731172000  | N  | 1.360275000  | 0.208035000  | 3.947011000  |
| N  | -0.982488000 | -3.826805000 | 1.149868000  | N  | 2.611151000  | 2.230289000  | 3.059098000  |
| N  | -2.609331000 | -4.936445000 | -0.401008000 | N  | 3.899105000  | 4.184670000  | 2.163886000  |
| N  | -1.317284000 | -6.277925000 | 1.226220000  | N  | 3.254463000  | 4.097598000  | 4.550354000  |
| N  | 0.278220000  | -5.137992000 | 2.822562000  | N  | 2.012304000  | 2.088718000  | 5.452880000  |
| N  | 1.697685000  | -3.997111000 | 4.551415000  | N  | 0.983688000  | 0.003956000  | 6.403631000  |
| B  | 1.068384000  | 3.544092000  | 3.755539000  | B  | 0.477003000  | -5.271642000 | 0.936370000  |
| B  | 2.329788000  | 2.180336000  | 5.458929000  | B  | -0.085601000 | -5.400256000 | 3.391380000  |
| B  | 2.322875000  | -0.328376000 | 5.279611000  | B  | 0.162931000  | -3.346621000 | 4.825111000  |
| N  | 0.519593000  | 4.801203000  | 3.343972000  | N  | 0.720812000  | -5.931203000 | -0.310891000 |
| N  | 1.903559000  | 3.423088000  | 4.921155000  | N  | 0.025761000  | -5.984552000 | 2.102150000  |
| N  | 1.980167000  | 0.970258000  | 4.746619000  | N  | 0.195975000  | -3.987058000 | 3.529219000  |
| B  | -4.856174000 | -0.985196000 | -2.944477000 | B  | 4.857352000  | 2.930159000  | -2.801269000 |
| B  | -3.599866000 | -4.851906000 | -1.444037000 | B  | 4.568431000  | 4.849247000  | 1.074189000  |
| N  | -5.309611000 | 0.302617000  | -3.369513000 | N  | 4.992700000  | 2.252603000  | -4.052963000 |
| N  | -3.992784000 | -3.573418000 | -1.973311000 | N  | 4.639923000  | 4.230237000  | -0.222099000 |
| B  | -5.006699000 | -3.491735000 | -3.001472000 | B  | 5.332279000  | 4.891835000  | -1.306505000 |
| N  | -5.400610000 | -2.209076000 | -3.465091000 | N  | 5.411253000  | 4.234156000  | -2.561980000 |
| Si | 0.352057000  | -0.069189000 | 1.246499000  | Si | 0.923070000  | -0.847122000 | 1.173966000  |
| N  | -0.587594000 | -1.415625000 | 0.897880000  | N  | 1.864681000  | 0.503254000  | 1.481205000  |
| H  | 2.801510000  | -2.928637000 | 6.232311000  | H  | 0.251991000  | -1.968738000 | 7.275674000  |
| H  | 2.942624000  | -0.396824000 | 6.299565000  | H  | -0.147875000 | -3.986963000 | 5.785297000  |
| H  | 2.957730000  | 2.134322000  | 6.475202000  | H  | -0.402010000 | -6.057668000 | 4.338226000  |
| H  | 2.132923000  | 4.255843000  | 5.445304000  | H  | -0.148374000 | -6.977156000 | 2.028980000  |
| H  | 0.754486000  | 5.623827000  | 3.882208000  | H  | 0.543423000  | -6.924639000 | -0.368447000 |
| H  | -0.818658000 | 7.015742000  | 2.414462000  | H  | 1.411184000  | -6.923522000 | -2.783155000 |
| H  | -2.540002000 | 7.316404000  | 0.630573000  | H  | 2.463707000  | -5.867092000 | -4.786312000 |
| H  | -3.942979000 | 6.184875000  | -1.109825000 | H  | 3.442195000  | -3.770919000 | -5.755553000 |
| H  | -5.403758000 | 5.059655000  | -2.822754000 | H  | 4.506509000  | -1.699354000 | -6.715410000 |
| H  | -6.076927000 | 2.872831000  | -3.831789000 | H  | 5.202478000  | 0.656281000  | -6.248617000 |
| H  | -6.048155000 | 0.355836000  | -4.057142000 | H  | 5.500371000  | 2.706717000  | -4.799396000 |



|    |              |              |              |    |              |              |              |
|----|--------------|--------------|--------------|----|--------------|--------------|--------------|
| N  | 2.617221000  | 2.863724000  | 0.262690000  | N  | 1.912818000  | 3.212336000  | 1.598814000  |
| N  | 4.316553000  | 4.411073000  | -0.619158000 | N  | 2.431423000  | 5.617986000  | 1.625455000  |
| N  | 4.066538000  | 2.107258000  | -1.669514000 | N  | 2.932901000  | 4.261679000  | -0.467663000 |
| N  | 4.214958000  | -0.286976000 | -2.495455000 | N  | 3.862129000  | 2.947157000  | -2.429965000 |
| N  | 4.381512000  | -2.669988000 | -3.251664000 | N  | 4.807749000  | 1.618734000  | -4.333059000 |
| N  | 5.687416000  | -0.903405000 | -4.387242000 | N  | 4.868407000  | 4.091199000  | -4.380081000 |
| N  | 5.567505000  | 1.484028000  | -3.563548000 | N  | 3.961374000  | 5.416623000  | -2.426609000 |
| N  | 5.628037000  | 3.807314000  | -2.611688000 | N  | 3.253512000  | 6.733483000  | -0.408018000 |
| B  | 1.313280000  | 4.088558000  | 3.654658000  | B  | 1.275434000  | 1.935279000  | 5.159879000  |
| B  | 2.764046000  | 5.852066000  | 2.587525000  | B  | 1.414821000  | 4.452685000  | 5.144316000  |
| B  | 3.974846000  | 5.325721000  | 0.445645000  | B  | 2.043698000  | 5.641164000  | 3.017113000  |
| N  | 0.550266000  | 3.629265000  | 4.778976000  | N  | 1.168610000  | 0.708213000  | 5.892769000  |
| N  | 1.879878000  | 5.409335000  | 3.608094000  | N  | 1.166625000  | 3.217996000  | 5.801600000  |
| N  | 3.044794000  | 4.955023000  | 1.488885000  | N  | 1.720888000  | 4.425430000  | 3.730867000  |
| B  | 1.544786000  | -5.312335000 | 0.217762000  | B  | 4.366605000  | -3.334932000 | -2.786003000 |
| B  | 4.032415000  | -4.056332000 | -3.097086000 | B  | 5.125328000  | 0.350470000  | -4.936601000 |
| N  | 0.770939000  | -5.713840000 | 1.356604000  | N  | 4.184479000  | -4.532422000 | -2.023933000 |
| N  | 3.168238000  | -4.474702000 | -2.022418000 | N  | 4.838443000  | -0.878488000 | -4.243888000 |
| B  | 2.871306000  | -5.875174000 | -1.836769000 | B  | 5.186154000  | -2.147939000 | -4.841504000 |
| N  | 2.064520000  | -6.256754000 | -0.729491000 | N  | 4.928973000  | -3.336646000 | -4.107470000 |
| Si | 1.717648000  | 1.453112000  | 0.086551000  | Si | 1.723963000  | 1.788607000  | 0.729576000  |
| N  | 2.590461000  | 0.271789000  | -0.737734000 | N  | 2.730826000  | 1.741818000  | -0.613451000 |
| H  | 5.822929000  | 5.843004000  | -1.609111000 | H  | 2.795933000  | 7.887666000  | 1.501556000  |
| H  | 4.490091000  | 6.403883000  | 0.479282000  | H  | 2.010103000  | 6.685457000  | 3.597615000  |
| H  | 3.264215000  | 6.936637000  | 2.639697000  | H  | 1.372279000  | 5.485974000  | 5.743697000  |
| H  | 1.712498000  | 6.040949000  | 4.378724000  | H  | 0.979500000  | 3.253190000  | 6.793888000  |
| H  | 0.389480000  | 4.273530000  | 5.541033000  | H  | 0.990719000  | 0.760133000  | 6.886448000  |
| H  | -0.811871000 | 2.413136000  | 6.834299000  | H  | 1.176202000  | -1.790976000 | 7.037926000  |
| H  | -1.562738000 | 0.057168000  | 7.193848000  | H  | 1.680472000  | -4.060121000 | 6.122426000  |
| H  | -1.573543000 | -2.277452000 | 6.281156000  | H  | 2.400230000  | -5.371988000 | 4.113748000  |
| H  | -1.454979000 | -4.650266000 | 5.461176000  | H  | 3.211733000  | -6.695233000 | 2.135957000  |
| H  | -0.614480000 | -6.160637000 | 3.653150000  | H  | 3.942319000  | -6.582773000 | -0.253461000 |
| H  | 0.615344000  | -6.699884000 | 1.515271000  | H  | 4.480575000  | -5.411740000 | -2.424315000 |
| H  | 1.889986000  | -7.242860000 | -0.596818000 | H  | 5.197096000  | -4.213701000 | -4.530893000 |
| H  | 3.292390000  | -6.698840000 | -2.594427000 | H  | 5.684097000  | -2.198701000 | -5.927528000 |
| H  | 4.465263000  | -4.869616000 | -3.859090000 | H  | 5.637997000  | 0.316949000  | -6.016064000 |
| H  | 5.752076000  | -3.077815000 | -5.051686000 | H  | 5.678350000  | 2.823379000  | -6.086264000 |
| H  | 6.346624000  | -0.652040000 | -5.110229000 | H  | 5.131242000  | 4.934855000  | -4.869489000 |
| H  | 6.267151000  | 1.758448000  | -4.239469000 | H  | 4.255424000  | 6.277671000  | -2.866891000 |
| H  | 6.331053000  | 4.065819000  | -3.289810000 | H  | 3.547880000  | 7.586951000  | -0.861798000 |
| N  | 0.145459000  | 1.884615000  | -0.784505000 | N  | -0.064461000 | 1.678981000  | 0.228178000  |
| N  | -0.265584000 | 1.437695000  | -1.791468000 | N  | -0.538629000 | 1.611572000  | -0.841523000 |
| C  | -4.916818000 | -0.049545000 | -1.425403000 | C  | -4.479406000 | -1.162279000 | -0.565856000 |
| C  | -7.103044000 | -0.381003000 | -1.211441000 | C  | -6.484436000 | -2.127610000 | -0.380219000 |
| H  | -8.148674000 | -0.123560000 | -1.264901000 | H  | -7.561854000 | -2.164051000 | -0.363046000 |
| C  | -6.473315000 | -1.516419000 | -0.824077000 | C  | -5.551458000 | -3.092547000 | -0.226601000 |
| H  | -6.853092000 | -2.461147000 | -0.469501000 | H  | -5.640567000 | -4.151894000 | -0.047380000 |
| N  | -6.121937000 | 0.520738000  | -1.583181000 | N  | -5.801816000 | -0.936613000 | -0.588697000 |
| N  | -5.115460000 | -1.295227000 | -0.963595000 | N  | -4.313413000 | -2.476729000 | -0.342733000 |
| I  | -3.054477000 | 0.818599000  | -1.770178000 | I  | -2.918649000 | 0.229705000  | -0.800238000 |
| C  | -6.369584000 | 1.862150000  | -2.048698000 | C  | -6.408891000 | 0.333383000  | -0.794188000 |
| C  | -6.554132000 | 2.079685000  | -3.408932000 | C  | -6.704301000 | 0.760191000  | -2.086321000 |
| C  | -6.426040000 | 2.894503000  | -1.119641000 | C  | -6.697355000 | 1.148201000  | 0.297476000  |
| C  | -6.799761000 | 3.376542000  | -3.848791000 | C  | -7.286137000 | 2.003652000  | -2.290650000 |
| H  | -6.501473000 | 1.250814000  | -4.107679000 | C  | -7.279297000 | 2.392795000  | 0.101064000  |
| C  | -6.671690000 | 4.186293000  | -1.573444000 | C  | -7.571915000 | 2.815058000  | -1.194329000 |
| H  | -6.273848000 | 2.689387000  | -0.064774000 | C  | -3.051795000 | -3.129692000 | -0.256064000 |
| C  | -6.857899000 | 4.425065000  | -2.933303000 | C  | -2.351716000 | -3.141706000 | 0.947811000  |

|                                           |              |              |              |                                           |              |              |              |
|-------------------------------------------|--------------|--------------|--------------|-------------------------------------------|--------------|--------------|--------------|
| H                                         | -6.945277000 | 3.565883000  | -4.906812000 | C                                         | -2.505483000 | -3.723577000 | -1.390890000 |
| H                                         | -6.716160000 | 5.004800000  | -0.863110000 | C                                         | -1.104374000 | -3.746806000 | 1.021344000  |
| H                                         | -7.048173000 | 5.434683000  | -3.282179000 | C                                         | -1.261055000 | -4.333392000 | -1.324367000 |
| C                                         | -4.083388000 | -2.254075000 | -0.656552000 | C                                         | -0.569443000 | -4.348152000 | -0.115209000 |
| C                                         | -3.731504000 | -2.459566000 | 0.672888000  | F                                         | -2.873856000 | -2.559242000 | 2.015668000  |
| C                                         | -3.466778000 | -2.935057000 | -1.699689000 | F                                         | -0.435447000 | -3.757441000 | 2.161410000  |
| C                                         | -2.728251000 | -3.378958000 | 0.961548000  | F                                         | 0.603848000  | -4.942729000 | -0.052872000 |
| H                                         | -4.226107000 | -1.903178000 | 1.462984000  | F                                         | -0.734079000 | -4.902242000 | -2.394062000 |
| C                                         | -2.460416000 | -3.845712000 | -1.396754000 | F                                         | -3.175741000 | -3.692681000 | -2.532381000 |
| H                                         | -3.764178000 | -2.748375000 | -2.726686000 | F                                         | -6.405377000 | 0.731885000  | 1.520205000  |
| C                                         | -2.095060000 | -4.067620000 | -0.071354000 | F                                         | -7.553960000 | 3.172979000  | 1.131198000  |
| H                                         | -2.436403000 | -3.554183000 | 1.991666000  | F                                         | -8.124163000 | 3.995399000  | -1.384768000 |
| H                                         | -1.961613000 | -4.381488000 | -2.197326000 | F                                         | -7.568139000 | 2.417356000  | -3.513118000 |
| H                                         | -1.312110000 | -4.782191000 | 0.159744000  | F                                         | -6.419397000 | -0.022178000 | -3.115729000 |
| <b>XB5-N<sub>2</sub>-Si<sub>3</sub>BN</b> |              |              |              | <b>XB6-N<sub>2</sub>-Si<sub>3</sub>BN</b> |              |              |              |
| N                                         | -3.810394000 | 3.922938000  | -2.122169000 | N                                         | -3.883506000 | 4.270456000  | -2.347267000 |
| B                                         | -4.670827000 | 3.983848000  | -3.283201000 | B                                         | -4.481621000 | 4.483795000  | -3.647289000 |
| B                                         | -3.474132000 | 5.124543000  | -1.407587000 | B                                         | -3.613201000 | 5.387547000  | -1.483237000 |
| B                                         | -2.352641000 | 6.273398000  | 0.508671000  | B                                         | -2.831562000 | 6.302323000  | 0.709119000  |
| B                                         | -1.007806000 | 4.951066000  | 2.160343000  | B                                         | -1.958161000 | 4.759240000  | 2.481407000  |
| B                                         | -2.097506000 | 3.798185000  | 0.207694000  | B                                         | -2.699469000 | 3.840663000  | 0.258649000  |
| B                                         | -3.308131000 | 2.642301000  | -1.669187000 | B                                         | -3.577902000 | 2.923391000  | -1.912804000 |
| B                                         | -4.566087000 | 1.482723000  | -3.485954000 | B                                         | -4.518600000 | 2.001802000  | -4.032613000 |
| B                                         | -3.211817000 | 0.135486000  | -1.856845000 | B                                         | -3.613924000 | 0.435977000  | -2.291149000 |
| B                                         | -1.858014000 | 1.330775000  | -0.130002000 | B                                         | -2.566923000 | 1.391531000  | -0.234121000 |
| B                                         | -0.674946000 | 2.504432000  | 1.807157000  | B                                         | -1.728461000 | 2.325062000  | 1.994835000  |
| B                                         | 0.496520000  | 1.109427000  | 3.649442000  | B                                         | -1.047378000 | 0.709586000  | 3.903806000  |
| B                                         | -1.893384000 | -1.250332000 | -0.248365000 | B                                         | -2.733443000 | -1.163757000 | -0.584181000 |
| B                                         | -3.373343000 | -2.374509000 | -1.902801000 | B                                         | -3.913920000 | -2.044102000 | -2.589037000 |
| B                                         | -2.197816000 | -3.730895000 | -0.141719000 | B                                         | -3.195523000 | -3.615858000 | -0.761271000 |
| B                                         | -0.748706000 | -2.628193000 | 1.572000000  | B                                         | -2.062490000 | -2.759563000 | 1.296993000  |
| B                                         | 0.458607000  | -1.442510000 | 3.532601000  | B                                         | -1.214762000 | -1.818532000 | 3.557192000  |
| B                                         | 1.208239000  | -2.782718000 | 5.497995000  | B                                         | -0.992076000 | -3.351180000 | 5.511639000  |
| B                                         | 0.161974000  | -3.919267000 | 3.505180000  | B                                         | -1.648622000 | -4.255938000 | 3.251650000  |
| B                                         | -1.140894000 | -5.088038000 | 1.693987000  | B                                         | -2.611118000 | -5.184655000 | 1.117308000  |
| B                                         | -2.518510000 | -6.215645000 | -0.070966000 | B                                         | -3.661910000 | -6.068295000 | -0.980053000 |
| N                                         | -1.555427000 | 6.188520000  | 1.683665000  | N                                         | -2.304996000 | 6.068592000  | 2.010006000  |
| N                                         | -2.634782000 | 5.066899000  | -0.237765000 | N                                         | -3.040363000 | 5.178242000  | -0.177194000 |
| N                                         | -5.012452000 | 2.772057000  | -3.938140000 | N                                         | -4.772190000 | 3.352699000  | -4.453523000 |
| N                                         | -3.673060000 | 1.418680000  | -2.341752000 | N                                         | -3.882594000 | 1.783863000  | -2.744115000 |
| N                                         | -2.425192000 | 2.588978000  | -0.525555000 | N                                         | -2.953555000 | 2.716860000  | -0.624679000 |
| N                                         | -1.261755000 | 3.747908000  | 1.392739000  | N                                         | -2.131023000 | 3.638082000  | 1.578651000  |
| N                                         | 0.072245000  | 2.375498000  | 3.059021000  | N                                         | -1.261074000 | 2.044709000  | 3.352608000  |
| N                                         | -0.878064000 | 1.364388000  | 0.936727000  | N                                         | -1.828978000 | 1.268876000  | 1.007612000  |
| N                                         | -2.255104000 | 0.071932000  | -0.756193000 | N                                         | -2.906369000 | 0.216677000  | -1.032337000 |
| N                                         | -3.705660000 | -1.084202000 | -2.458378000 | N                                         | -4.051389000 | -0.693819000 | -3.081184000 |
| N                                         | -2.491587000 | -2.450549000 | -0.759919000 | N                                         | -3.285189000 | -2.273057000 | -1.306980000 |
| N                                         | 0.374189000  | -0.134374000 | 2.918085000  | N                                         | -1.083770000 | -0.465167000 | 3.055486000  |
| N                                         | 0.997423000  | -1.495203000 | 4.872515000  | N                                         | -0.980318000 | -2.009321000 | 4.969504000  |
| N                                         | 0.003361000  | -2.636302000 | 2.827616000  | N                                         | -1.584551000 | -2.917402000 | 2.671220000  |
| N                                         | -1.364466000 | -3.812366000 | 1.042929000  | N                                         | -2.624748000 | -3.849413000 | 0.552322000  |
| N                                         | -2.768249000 | -4.938054000 | -0.702023000 | N                                         | -3.708343000 | -4.730469000 | -1.529016000 |
| N                                         | -1.720282000 | -6.261078000 | 1.105550000  | N                                         | -3.121563000 | -6.262933000 | 0.321494000  |
| N                                         | -0.352914000 | -5.105579000 | 2.890515000  | N                                         | -2.088854000 | -5.350822000 | 2.441203000  |
| N                                         | 0.819312000  | -3.947416000 | 4.785461000  | N                                         | -1.283639000 | -4.427494000 | 4.633195000  |
| B                                         | 0.260935000  | 3.584709000  | 3.853764000  | B                                         | -1.167109000 | 3.174390000  | 4.272579000  |
| B                                         | 1.274558000  | 2.240838000  | 5.731081000  | B                                         | -0.672198000 | 1.620152000  | 6.194881000  |
| B                                         | 1.313741000  | -0.269786000 | 5.569768000  | B                                         | -0.751415000 | -0.866566000 | 5.823666000  |





|    |             |              |              |    |             |              |              |
|----|-------------|--------------|--------------|----|-------------|--------------|--------------|
| B  | 3.735648000 | -1.832440000 | 1.487602000  | B  | 3.858055000 | -1.391252000 | -1.796708000 |
| B  | 2.731843000 | 0.453399000  | 1.389497000  | B  | 2.812713000 | -1.103223000 | 0.455829000  |
| B  | 1.942305000 | 2.872918000  | 1.197797000  | B  | 1.977003000 | -0.766727000 | 2.845679000  |
| B  | 1.306194000 | 3.850134000  | -1.114568000 | B  | 1.796668000 | 1.621209000  | 3.833995000  |
| B  | 2.899423000 | -1.021210000 | -0.724276000 | B  | 3.465417000 | 0.939656000  | -0.985029000 |
| B  | 4.038161000 | -3.229929000 | -0.581941000 | B  | 4.606151000 | 0.582162000  | -3.166500000 |
| B  | 3.367205000 | -2.303137000 | -2.820368000 | B  | 4.385275000 | 2.905111000  | -2.228115000 |
| B  | 2.278161000 | -0.060112000 | -3.004097000 | B  | 3.298016000 | 3.294120000  | -0.011154000 |
| B  | 1.475135000 | 2.392958000  | -3.202672000 | B  | 2.464223000 | 3.638410000  | 2.416100000  |
| B  | 1.284198000 | 3.437735000  | -5.460485000 | B  | 2.711600000 | 5.877072000  | 3.486266000  |
| B  | 1.907258000 | 1.005596000  | -5.231268000 | B  | 3.355580000 | 5.541960000  | 1.071279000  |
| B  | 2.829638000 | -1.332643000 | -5.077565000 | B  | 4.293160000 | 5.218958000  | -1.244485000 |
| B  | 3.836425000 | -3.621550000 | -4.900029000 | B  | 5.292060000 | 4.854875000  | -3.515012000 |
| N  | 2.504916000 | 4.579729000  | 4.535021000  | N  | 1.818254000 | -4.153965000 | 4.541251000  |
| N  | 3.194447000 | 2.214095000  | 4.745550000  | N  | 2.617683000 | -4.482808000 | 2.225645000  |
| N  | 4.835957000 | -2.455537000 | 5.083975000  | N  | 4.315473000 | -5.129044000 | -2.389974000 |
| N  | 3.989984000 | -1.629706000 | 2.898396000  | N  | 3.834250000 | -2.825168000 | -1.592516000 |
| N  | 3.108580000 | 0.699771000  | 2.753657000  | N  | 2.908465000 | -2.516658000 | 0.704107000  |
| N  | 2.334032000 | 3.094934000  | 2.562154000  | N  | 2.084866000 | -2.183062000 | 3.067043000  |
| N  | 1.505253000 | 3.965814000  | 0.327443000  | N  | 1.677531000 | 0.167665000  | 3.930581000  |
| N  | 2.022066000 | 1.514212000  | 0.707327000  | N  | 2.207086000 | -0.298408000 | 1.494962000  |
| N  | 3.058119000 | -0.799416000 | 0.712236000  | N  | 3.312929000 | -0.501233000 | -0.777102000 |
| N  | 4.160282000 | -3.058512000 | 0.846491000  | N  | 4.431513000 | -0.843134000 | -3.005765000 |
| N  | 3.440770000 | -2.181100000 | -1.375959000 | N  | 4.159266000 | 1.473895000  | -2.121347000 |
| N  | 1.333464000 | 2.562404000  | -1.773035000 | N  | 2.018650000 | 2.267602000  | 2.559341000  |
| N  | 1.264070000 | 3.567572000  | -4.020031000 | N  | 2.386213000 | 4.470801000  | 3.594602000  |
| N  | 1.830084000 | 1.099446000  | -3.777698000 | N  | 2.979614000 | 4.133379000  | 1.144030000  |
| N  | 2.828567000 | -1.228968000 | -3.632381000 | N  | 3.997222000 | 3.802358000  | -1.156928000 |
| N  | 3.865872000 | -3.504163000 | -3.458651000 | N  | 5.029539000 | 3.435370000  | -3.411101000 |
| N  | 3.325923000 | -2.541058000 | -5.671358000 | N  | 4.927006000 | 5.706144000  | -2.435642000 |
| N  | 2.335774000 | -0.220607000 | -5.834260000 | N  | 3.935638000 | 6.051583000  | -0.134774000 |
| N  | 1.565268000 | 2.162575000  | -6.017426000 | N  | 3.146456000 | 6.371646000  | 2.228676000  |
| B  | 1.423117000 | 5.297696000  | 0.915331000  | B  | 1.414935000 | -0.397415000 | 5.249490000  |
| B  | 0.958930000 | 6.309985000  | -1.346309000 | B  | 1.405439000 | 1.902942000  | 6.280424000  |
| B  | 1.042147000 | 4.849529000  | -3.392755000 | B  | 1.987335000 | 3.895596000  | 4.858028000  |
| N  | 1.692576000 | 5.468177000  | 2.311908000  | N  | 1.378109000 | -1.821541000 | 5.407441000  |
| N  | 1.086896000 | 6.409559000  | 0.064303000  | N  | 1.219313000 | 0.496566000  | 6.359304000  |
| N  | 1.098315000 | 5.006963000  | -1.957510000 | N  | 1.727586000 | 2.479324000  | 4.994121000  |
| B  | 4.770853000 | -4.114877000 | 1.634039000  | B  | 4.901550000 | -1.731767000 | -4.054383000 |
| B  | 4.417880000 | -4.568793000 | -2.660989000 | B  | 5.428311000 | 2.549573000  | -4.474494000 |
| N  | 4.936954000 | -3.918872000 | 3.040951000  | N  | 4.790635000 | -3.145093000 | -3.860225000 |
| N  | 4.506325000 | -4.437366000 | -1.231457000 | N  | 5.222307000 | 1.130083000  | -4.356194000 |
| B  | 5.084692000 | -5.498554000 | -0.438169000 | B  | 5.648798000 | 0.242538000  | -5.414841000 |
| N  | 5.189950000 | -5.316578000 | 0.965770000  | N  | 5.467300000 | -1.155500000 | -5.242361000 |
| Si | 1.365731000 | 1.183743000  | -0.805814000 | Si | 1.911322000 | 1.327204000  | 1.170423000  |
| N  | 2.207444000 | -0.063946000 | -1.559606000 | N  | 2.936705000 | 1.892291000  | -0.034285000 |
| H  | 1.068861000 | 4.380316000  | -6.164540000 | H  | 2.618264000 | 6.603059000  | 4.431543000  |
| H  | 0.826641000 | 5.806613000  | -4.076938000 | H  | 1.891322000 | 4.601211000  | 5.818226000  |
| H  | 0.740488000 | 7.280603000  | -2.010444000 | H  | 1.300279000 | 2.589473000  | 7.253485000  |
| H  | 1.016344000 | 7.331525000  | 0.471320000  | H  | 1.023763000 | 0.107535000  | 7.271018000  |
| H  | 1.619433000 | 6.396899000  | 2.703804000  | H  | 1.190448000 | -2.194775000 | 6.327842000  |
| H  | 2.392396000 | 5.483959000  | 4.970621000  | H  | 1.585781000 | -4.560683000 | 5.436141000  |
| H  | 3.249426000 | 3.702713000  | 6.496725000  | H  | 2.302422000 | -6.212644000 | 3.704744000  |
| H  | 3.973456000 | 1.309368000  | 6.691746000  | H  | 3.146485000 | -6.532730000 | 1.370801000  |
| H  | 4.789115000 | -1.064028000 | 6.885074000  | H  | 3.982916000 | -6.880092000 | -0.975218000 |
| H  | 5.248296000 | -3.188095000 | 5.644012000  | H  | 4.646938000 | -5.756449000 | -3.108940000 |
| H  | 5.371221000 | -4.650483000 | 3.586077000  | H  | 5.135586000 | -3.762918000 | -4.581659000 |
| H  | 5.611487000 | -6.060658000 | 1.503271000  | H  | 5.786675000 | -1.762922000 | -5.983563000 |

|                                           |              |              |              |                                            |              |              |              |
|-------------------------------------------|--------------|--------------|--------------|--------------------------------------------|--------------|--------------|--------------|
| H                                         | 5.469853000  | -6.507337000 | -0.953074000 | H                                          | 6.146551000  | 0.675321000  | -6.412381000 |
| H                                         | 4.812350000  | -5.565261000 | -3.191661000 | H                                          | 5.939187000  | 2.996276000  | -5.458776000 |
| H                                         | 4.241588000  | -4.610082000 | -5.437957000 | H                                          | 5.812748000  | 5.307274000  | -4.491855000 |
| H                                         | 3.329376000  | -2.641810000 | -6.676348000 | H                                          | 5.132013000  | 6.690902000  | -2.528093000 |
| H                                         | 2.370798000  | -0.271260000 | -6.843083000 | H                                          | 4.173987000  | 7.033073000  | -0.173027000 |
| H                                         | 1.601798000  | 2.095737000  | -7.024868000 | H                                          | 3.390863000  | 7.350680000  | 2.177468000  |
| N                                         | -0.408073000 | 0.726615000  | -0.503993000 | N                                          | 0.137821000  | 1.376414000  | 0.636146000  |
| N                                         | -0.936901000 | -0.295680000 | -0.737592000 | N                                          | -0.355214000 | 1.794483000  | -0.342777000 |
| C                                         | -5.707389000 | -0.818141000 | 0.371027000  | C                                          | -4.491222000 | -0.739077000 | -0.567753000 |
| N                                         | -6.599554000 | 0.207166000  | 0.493286000  | N                                          | -4.365808000 | -2.084807000 | -0.383859000 |
| I                                         | -3.676118000 | -0.615911000 | -0.115162000 | I                                          | -2.852512000 | 0.569617000  | -0.594199000 |
| C                                         | -6.434159000 | -1.957145000 | 0.660981000  | C                                          | -5.849889000 | -0.532219000 | -0.658146000 |
| N                                         | -7.801931000 | -0.202890000 | 0.835238000  | N                                          | -5.525973000 | -2.713376000 | -0.349693000 |
| N                                         | -7.690845000 | -1.502863000 | 0.938484000  | N                                          | -6.409206000 | -1.771611000 | -0.518558000 |
| C                                         | -6.052241000 | -3.375979000 | 0.712469000  | C                                          | -6.613798000 | 0.695056000  | -0.888367000 |
| C                                         | -5.063851000 | -3.795788000 | 1.607406000  | C                                          | -6.446164000 | 1.413022000  | -2.074173000 |
| C                                         | -6.674606000 | -4.301461000 | -0.131560000 | C                                          | -7.489884000 | 1.197797000  | 0.074427000  |
| C                                         | -4.707276000 | -5.138493000 | 1.659830000  | C                                          | -7.127370000 | 2.601717000  | -2.294382000 |
| H                                         | -4.581077000 | -3.075473000 | 2.260905000  | C                                          | -8.186022000 | 2.378976000  | -0.130363000 |
| C                                         | -6.312668000 | -5.642153000 | -0.073727000 | C                                          | -7.996398000 | 3.082406000  | -1.318273000 |
| H                                         | -7.421816000 | -3.971275000 | -0.848007000 | C                                          | -3.151704000 | -2.822753000 | -0.287332000 |
| C                                         | -5.331179000 | -6.060240000 | 0.822361000  | C                                          | -2.503493000 | -2.947917000 | 0.938080000  |
| H                                         | -3.942391000 | -5.464632000 | 2.356530000  | C                                          | -2.583396000 | -3.338839000 | -1.448719000 |
| H                                         | -6.790570000 | -6.358481000 | -0.733667000 | C                                          | -1.281220000 | -3.602828000 | 1.006381000  |
| H                                         | -5.050229000 | -7.107531000 | 0.866002000  | C                                          | -1.363426000 | -3.994637000 | -1.385966000 |
| C                                         | -8.863846000 | -2.283564000 | 1.325325000  | C                                          | -0.720701000 | -4.125358000 | -0.156773000 |
| H                                         | -9.323794000 | -2.720590000 | 0.438091000  | F                                          | -5.629952000 | 0.951521000  | -3.012297000 |
| H                                         | -8.545206000 | -3.072335000 | 2.006737000  | F                                          | -7.662162000 | 0.527256000  | 1.213130000  |
| H                                         | -9.561676000 | -1.607388000 | 1.816541000  | F                                          | -6.962081000 | 3.270658000  | -3.421627000 |
| C                                         | -6.374001000 | 1.618537000  | 0.311527000  | F                                          | -8.650184000 | 4.207284000  | -1.521268000 |
| C                                         | -6.068863000 | 2.091778000  | -0.958673000 | F                                          | -9.014999000 | 2.839576000  | 0.790337000  |
| C                                         | -6.471755000 | 2.453581000  | 1.417114000  | F                                          | -3.204781000 | -3.183965000 | -2.606476000 |
| C                                         | -5.848644000 | 3.454811000  | -1.120140000 | F                                          | -3.047552000 | -2.428746000 | 2.025975000  |
| H                                         | -6.009974000 | 1.410271000  | -1.800962000 | F                                          | -0.654693000 | -3.729939000 | 2.163070000  |
| C                                         | -6.252934000 | 3.815187000  | 1.237699000  | F                                          | 0.433606000  | -4.755746000 | -0.102399000 |
| H                                         | -6.710146000 | 2.044588000  | 2.393101000  | F                                          | -0.810347000 | -4.491623000 | -2.477324000 |
| C                                         | -5.939942000 | 4.312251000  | -0.025460000 | C                                          | -7.830915000 | -2.113769000 | -0.527088000 |
| H                                         | -5.610516000 | 3.846859000  | -2.102872000 | H                                          | -8.295221000 | -1.712483000 | 0.373946000  |
| H                                         | -6.323553000 | 4.486477000  | 2.086690000  | H                                          | -8.287236000 | -1.678642000 | -1.417028000 |
| H                                         | -5.767796000 | 5.375046000  | -0.159157000 | H                                          | -7.908438000 | -3.199255000 | -0.550309000 |
| <b>XB9-N<sub>2</sub>-Si<sub>B</sub>BN</b> |              |              |              | <b>XB10-N<sub>2</sub>-Si<sub>B</sub>BN</b> |              |              |              |
| N                                         | -5.077873000 | 0.439517000  | -2.675569000 | N                                          | 4.486141000  | -3.626466000 | -2.684136000 |
| B                                         | -5.895785000 | -0.515880000 | -3.386028000 | B                                          | 5.091222000  | -3.634902000 | -3.995595000 |
| B                                         | -5.294990000 | 1.851021000  | -2.846322000 | B                                          | 4.435469000  | -4.831526000 | -1.900898000 |
| B                                         | -4.745972000 | 4.222238000  | -2.271988000 | B                                          | 3.843600000  | -6.029851000 | 0.211337000  |
| B                                         | -2.901455000 | 4.730622000  | -0.650812000 | B                                          | 2.721967000  | -4.798464000 | 2.085435000  |
| B                                         | -3.423485000 | 2.348388000  | -1.260605000 | B                                          | 3.270095000  | -3.603781000 | -0.057142000 |
| B                                         | -4.033144000 | -0.032130000 | -1.786287000 | B                                          | 3.938240000  | -2.391999000 | -2.154188000 |
| B                                         | -4.665655000 | -2.398510000 | -2.266902000 | B                                          | 4.652415000  | -1.171457000 | -4.210703000 |
| B                                         | -2.795051000 | -1.912375000 | -0.664874000 | B                                          | 3.510718000  | 0.078136000  | -2.356344000 |
| B                                         | -2.091554000 | 0.458961000  | -0.306879000 | B                                          | 2.685960000  | -1.191104000 | -0.367265000 |
| B                                         | -1.509789000 | 2.870859000  | 0.260950000  | B                                          | 2.064186000  | -2.410340000 | 1.779356000  |
| B                                         | 0.239693000  | 3.381781000  | 2.096207000  | B                                          | 1.154508000  | -1.082690000 | 3.804486000  |
| B                                         | -0.928884000 | -1.477731000 | 0.938734000  | B                                          | 2.394480000  | 1.367350000  | -0.529524000 |
| B                                         | -1.750110000 | -3.805858000 | 0.619903000  | B                                          | 3.349557000  | 2.585169000  | -2.480317000 |
| B                                         | -0.006460000 | -3.315058000 | 2.361067000  | B                                          | 2.397654000  | 3.868224000  | -0.541693000 |
| B                                         | 0.797060000  | -0.979288000 | 2.739347000  | B                                          | 1.486506000  | 2.674011000  | 1.455686000  |
| B                                         | 1.382688000  | 1.469586000  | 3.327906000  | B                                          | 0.868360000  | 1.441924000  | 3.643463000  |

|    |              |              |              |    |              |              |              |
|----|--------------|--------------|--------------|----|--------------|--------------|--------------|
| B  | 2.731133000  | 1.941599000  | 5.374602000  | B  | 0.404038000  | 2.772425000  | 5.703839000  |
| B  | 2.295050000  | -0.435487000 | 4.659513000  | B  | 0.830069000  | 3.933687000  | 3.508239000  |
| B  | 1.652092000  | -2.823630000 | 4.185232000  | B  | 1.560423000  | 5.168186000  | 1.439912000  |
| B  | 0.942732000  | -5.185941000 | 3.732335000  | B  | 2.381873000  | 6.374606000  | -0.598650000 |
| N  | -3.961232000 | 5.145635000  | -1.528213000 | N  | 3.290766000  | -5.991046000 | 1.520391000  |
| N  | -4.490085000 | 2.806328000  | -2.131079000 | N  | 3.846254000  | -4.825155000 | -0.587913000 |
| N  | -5.668891000 | -1.900672000 | -3.170271000 | N  | 5.149532000  | -2.419148000 | -4.726294000 |
| N  | -3.819019000 | -1.444585000 | -1.576958000 | N  | 4.016597000  | -1.162675000 | -2.907354000 |
| N  | -3.194919000 | 0.924723000  | -1.105108000 | N  | 3.309085000  | -2.393505000 | -0.855538000 |
| N  | -2.619968000 | 3.315466000  | -0.540570000 | N  | 2.692903000  | -3.601839000 | 1.271619000  |
| N  | -0.743551000 | 3.795054000  | 1.097892000  | N  | 1.584846000  | -2.320603000 | 3.159200000  |
| N  | -1.201468000 | 1.461287000  | 0.229023000  | N  | 1.957046000  | -1.289219000 | 0.875485000  |
| N  | -1.889876000 | -0.963047000 | -0.035846000 | N  | 2.804828000  | 0.077692000  | -1.083848000 |
| N  | -2.679489000 | -3.327448000 | -0.376593000 | N  | 3.721640000  | 1.321008000  | -3.070498000 |
| N  | -0.908700000 | -2.865467000 | 1.318621000  | N  | 2.725695000  | 2.607873000  | -1.179792000 |
| N  | 0.683830000  | 2.011329000  | 2.186727000  | N  | 0.976043000  | 0.132414000  | 3.046227000  |
| N  | 1.920037000  | 2.420669000  | 4.279369000  | N  | 0.636400000  | 1.494005000  | 5.072343000  |
| N  | 1.516800000  | 0.027943000  | 3.520115000  | N  | 1.013796000  | 2.653112000  | 2.840726000  |
| N  | 0.802952000  | -2.371388000 | 3.104754000  | N  | 1.824277000  | 3.903550000  | 0.788004000  |
| N  | 0.065197000  | -4.729083000 | 2.678232000  | N  | 2.676452000  | 5.111230000  | -1.236551000 |
| N  | 1.701850000  | -4.232291000 | 4.464855000  | N  | 1.840609000  | 6.377339000  | 0.716023000  |
| N  | 2.394364000  | -1.842209000 | 4.919086000  | N  | 1.039827000  | 5.146954000  | 2.774024000  |
| N  | 2.925835000  | 0.541248000  | 5.509896000  | N  | 0.467628000  | 3.942829000  | 4.902130000  |
| B  | -1.095627000 | 5.205932000  | 1.037984000  | B  | 1.692244000  | -3.512400000 | 3.988097000  |
| B  | 0.468118000  | 5.717200000  | 2.947002000  | B  | 0.977491000  | -2.210757000 | 6.024028000  |
| B  | 1.649120000  | 3.829319000  | 4.114230000  | B  | 0.630177000  | 0.272072000  | 5.841387000  |
| N  | -2.110391000 | 5.640326000  | 0.122516000  | N  | 2.187812000  | -4.728330000 | 3.412232000  |
| N  | -0.427321000 | 6.125149000  | 1.922810000  | N  | 1.320803000  | -3.427403000 | 5.377025000  |
| N  | 0.788279000  | 4.313210000  | 3.060699000  | N  | 0.921206000  | -1.004208000 | 5.231888000  |
| B  | -3.524870000 | -4.279954000 | -1.069716000 | B  | 4.355220000  | 1.309470000  | -4.374854000 |
| B  | -0.739715000 | -5.671711000 | 1.946462000  | B  | 3.258784000  | 5.084873000  | -2.552346000 |
| N  | -4.477212000 | -3.795265000 | -2.021325000 | N  | 4.771581000  | 0.058827000  | -4.930772000 |
| N  | -1.649810000 | -5.219941000 | 0.928229000  | N  | 3.598527000  | 3.834064000  | -3.175462000 |
| B  | -2.468248000 | -6.167195000 | 0.207870000  | B  | 4.198745000  | 3.813499000  | -4.488946000 |
| N  | -3.376447000 | -5.678950000 | -0.768309000 | N  | 4.550869000  | 2.561015000  | -5.057075000 |
| Si | 0.236366000  | 0.946922000  | 0.950766000  | Si | 1.018271000  | 0.029090000  | 1.358870000  |
| N  | 0.024800000  | -0.607262000 | 1.580270000  | N  | 1.664273000  | 1.450885000  | 0.711582000  |
| H  | 3.224096000  | 2.705077000  | 6.153709000  | H  | 0.169290000  | 2.847190000  | 6.875156000  |
| H  | 2.126041000  | 4.611288000  | 4.884657000  | H  | 0.404608000  | 0.322046000  | 7.015655000  |
| H  | 0.938947000  | 6.518751000  | 3.701125000  | H  | 0.747167000  | -2.186911000 | 7.198344000  |
| H  | -0.655642000 | 7.107658000  | 1.870205000  | H  | 1.374723000  | -4.258264000 | 5.948813000  |
| H  | -2.324807000 | 6.626786000  | 0.077280000  | H  | 2.235388000  | -5.551160000 | 3.996815000  |
| H  | -4.164513000 | 6.128720000  | -1.638140000 | H  | 3.307914000  | -6.843095000 | 2.062148000  |
| H  | -5.610492000 | 4.614418000  | -3.001489000 | H  | 4.307646000  | -7.046009000 | -0.219368000 |
| H  | -6.155075000 | 2.234032000  | -3.585275000 | H  | 4.894673000  | -5.845113000 | -2.341656000 |
| H  | -6.749496000 | -0.149507000 | -4.141373000 | H  | 5.539951000  | -4.644256000 | -4.457504000 |
| H  | -6.254886000 | -2.554949000 | -3.668736000 | H  | 5.583842000  | -2.439923000 | -5.637800000 |
| H  | -5.068179000 | -4.458953000 | -2.501971000 | H  | 5.216927000  | 0.052266000  | -5.837605000 |
| H  | -3.947839000 | -6.353415000 | -1.256713000 | H  | 4.978787000  | 2.564338000  | -5.971844000 |
| H  | -2.385317000 | -7.340877000 | 0.429537000  | H  | 4.400397000  | 4.832019000  | -5.085126000 |
| H  | -0.655055000 | -6.840248000 | 2.191243000  | H  | 3.468955000  | 6.112782000  | -3.128317000 |
| H  | 1.027980000  | -6.351907000 | 3.990715000  | H  | 2.595780000  | 7.407775000  | -1.164570000 |
| H  | 2.303035000  | -4.576412000 | 5.199698000  | H  | 1.650420000  | 7.272639000  | 1.142674000  |
| H  | 2.960711000  | -2.146921000 | 5.698508000  | H  | 0.885728000  | 6.026766000  | 3.246562000  |
| H  | 3.481355000  | 0.223525000  | 6.291366000  | H  | 0.321248000  | 4.829848000  | 5.362565000  |
| N  | 1.543559000  | 1.008763000  | -0.333027000 | N  | -0.699404000 | -0.283430000 | 0.800652000  |
| N  | 2.168106000  | 0.086236000  | -0.719680000 | N  | -1.334998000 | 0.403124000  | 0.083509000  |
| I  | 4.287953000  | -0.099887000 | -3.015376000 | C  | -8.078692000 | -1.498838000 | -2.315419000 |

|   |             |              |              |   |               |              |              |
|---|-------------|--------------|--------------|---|---------------|--------------|--------------|
| C | 5.751330000 | -0.290262000 | -4.626567000 | C | -9.048608000  | -0.742064000 | -1.671885000 |
| F | 6.890514000 | 0.309543000  | -4.296783000 | C | -8.671786000  | 0.206699000  | -0.730967000 |
| F | 5.292525000 | 0.266799000  | -5.742588000 | C | -7.325561000  | 0.393187000  | -0.440073000 |
| F | 6.008137000 | -1.570689000 | -4.872764000 | C | -6.338482000  | -0.354428000 | -1.074440000 |
|   |             |              |              | C | -6.736520000  | -1.300452000 | -2.013580000 |
|   |             |              |              | F | -5.842715000  | -2.047263000 | -2.653734000 |
|   |             |              |              | F | -8.436440000  | -2.408585000 | -3.217315000 |
|   |             |              |              | F | -7.011352000  | 1.312087000  | 0.467401000  |
|   |             |              |              | F | -9.598926000  | 0.933088000  | -0.113040000 |
|   |             |              |              | F | -10.332735000 | -0.925076000 | -1.955246000 |
|   |             |              |              | I | -4.305643000  | -0.061418000 | -0.628346000 |

Table S9. Cartesian coordinates of optimized geometries of intermediates involved in NRR by C<sub>B</sub>BN calculated at the  $\omega$ B97X-D/6-31G(d) level of theory.

| HN <sub>2</sub> -C <sub>B</sub> BN |              |              |              | H <sub>2</sub> N <sub>2</sub> -C <sub>B</sub> BN |              |              |              |
|------------------------------------|--------------|--------------|--------------|--------------------------------------------------|--------------|--------------|--------------|
| N                                  | -5.103465000 | -0.214992000 | -0.297312000 | N                                                | -4.992344000 | 1.063311000  | -0.374593000 |
| B                                  | -6.069434000 | -1.287456000 | -0.333158000 | B                                                | -6.198235000 | 0.271184000  | -0.368553000 |
| B                                  | -5.561797000 | 1.140433000  | -0.377034000 | B                                                | -5.087964000 | 2.484898000  | -0.528538000 |
| B                                  | -5.084870000 | 3.573115000  | -0.329489000 | B                                                | -4.013428000 | 4.720004000  | -0.518555000 |
| B                                  | -2.734044000 | 4.387039000  | -0.111257000 | B                                                | -1.547329000 | 4.925763000  | -0.177032000 |
| B                                  | -3.197833000 | 1.929163000  | -0.119570000 | B                                                | -2.608979000 | 2.658904000  | -0.213257000 |
| B                                  | -3.692396000 | -0.505668000 | -0.125197000 | B                                                | -3.700739000 | 0.435448000  | -0.152542000 |
| B                                  | -4.223765000 | -2.953688000 | -0.104691000 | B                                                | -4.837898000 | -1.794356000 | -0.021552000 |
| B                                  | -1.854633000 | -2.142984000 | -0.015693000 | B                                                | -2.341410000 | -1.608391000 | 0.049006000  |
| B                                  | -0.866687000 | 2.718036000  | -0.017369000 | B                                                | -0.162580000 | 2.845067000  | -0.000404000 |
| B                                  | 1.504701000  | 3.523914000  | -0.075995000 | B                                                | 2.334285000  | 3.030833000  | -0.007043000 |
| B                                  | 0.512968000  | -1.347926000 | 0.006236000  | B                                                | 0.142459000  | -1.431599000 | -0.013902000 |
| B                                  | 0.019906000  | -3.806014000 | -0.097441000 | B                                                | -0.952462000 | -3.690781000 | -0.063948000 |
| B                                  | 2.385037000  | -3.012387000 | -0.090920000 | B                                                | 1.534386000  | -3.515623000 | -0.156846000 |
| B                                  | 2.890085000  | -0.571885000 | -0.021340000 | B                                                | 2.638799000  | -1.280546000 | -0.080325000 |
| B                                  | 3.374384000  | 1.873084000  | -0.067888000 | B                                                | 3.725449000  | 0.962991000  | -0.054695000 |
| B                                  | 5.749168000  | 2.681722000  | -0.099376000 | B                                                | 6.227707000  | 1.146846000  | -0.094834000 |
| B                                  | 5.261811000  | 0.224708000  | -0.069500000 | B                                                | 5.135070000  | -1.106958000 | -0.147707000 |
| B                                  | 4.764379000  | -2.230444000 | -0.087807000 | B                                                | 4.033327000  | -3.356257000 | -0.217686000 |
| B                                  | 4.255922000  | -4.682333000 | -0.162482000 | B                                                | 2.922646000  | -5.601153000 | -0.295833000 |
| N                                  | -4.146382000 | 4.628726000  | -0.218355000 | N                                                | -2.846792000 | 5.510744000  | -0.363623000 |
| N                                  | -4.612812000 | 2.207589000  | -0.290422000 | N                                                | -3.902041000 | 3.281889000  | -0.448744000 |
| N                                  | -5.616308000 | -2.626288000 | -0.213378000 | N                                                | -6.102511000 | -1.130175000 | -0.165156000 |
| N                                  | -3.261947000 | -1.872740000 | -0.035747000 | N                                                | -3.635727000 | -0.991355000 | 0.016838000  |
| N                                  | -2.722545000 | 0.561214000  | -0.055128000 | N                                                | -2.493771000 | 1.221883000  | -0.120384000 |
| N                                  | -2.270381000 | 3.019027000  | -0.048835000 | N                                                | -1.444066000 | 3.487557000  | -0.091334000 |
| N                                  | 0.092735000  | 3.797816000  | -0.068170000 | N                                                | 1.038169000  | 3.652531000  | -0.017090000 |
| N                                  | -0.907122000 | -1.041285000 | 0.072565000  | N                                                | -1.147140000 | -0.787009000 | 0.104006000  |
| N                                  | -1.388380000 | -3.508456000 | -0.075986000 | N                                                | -2.238679000 | -3.050910000 | 0.007550000  |
| N                                  | 0.965722000  | -2.718627000 | -0.072002000 | N                                                | 0.236539000  | -2.876189000 | -0.092092000 |
| N                                  | 1.955088000  | 2.154050000  | -0.064901000 | N                                                | 2.424946000  | 1.592353000  | -0.022846000 |
| N                                  | 4.332972000  | 2.963546000  | -0.092699000 | N                                                | 4.929721000  | 1.776655000  | -0.052993000 |
| N                                  | 3.841537000  | 0.509705000  | -0.047776000 | N                                                | 3.834291000  | -0.474381000 | -0.090346000 |
| N                                  | 3.344619000  | -1.940180000 | -0.059610000 | N                                                | 2.734071000  | -2.719675000 | -0.149952000 |
| N                                  | 2.840984000  | -4.389908000 | -0.142490000 | N                                                | 1.628108000  | -4.964283000 | -0.220330000 |
| N                                  | 5.179708000  | -3.606011000 | -0.131707000 | N                                                | 4.087774000  | -4.791515000 | -0.292727000 |
| N                                  | 5.691169000  | -1.140936000 | -0.075545000 | N                                                | 5.205650000  | -2.536209000 | -0.206881000 |
| N                                  | 6.180658000  | 1.329308000  | -0.088218000 | N                                                | 6.303830000  | -0.270227000 | -0.144029000 |
| B                                  | -0.365319000 | 5.174682000  | -0.083126000 | B                                                | 0.939491000  | 5.098697000  | -0.036550000 |

|   |              |                                                   |              |   |              |                                         |              |
|---|--------------|---------------------------------------------------|--------------|---|--------------|-----------------------------------------|--------------|
| B | 2.010265000  | 5.978665000                                       | -0.107407000 | B | 3.441084000  | 5.279834000                             | 0.013382000  |
| B | 3.874703000  | 4.324692000                                       | -0.106659000 | B | 4.829716000  | 3.209274000                             | -0.015977000 |
| N | -1.769218000 | 5.440975000                                       | -0.087553000 | N | -0.352216000 | 5.707702000                             | -0.094985000 |
| N | 0.614382000  | 6.227422000                                       | -0.099559000 | N | 2.152834000  | 5.872248000                             | -0.005029000 |
| N | 2.468234000  | 4.609843000                                       | -0.098781000 | N | 3.541302000  | 3.840130000                             | 0.003156000  |
| B | -2.346669000 | -4.599907000                                      | -0.097811000 | B | -3.441100000 | -3.863234000                            | 0.027006000  |
| B | 1.890221000  | -5.464666000                                      | -0.170963000 | B | 0.437585000  | -5.766173000                            | -0.197161000 |
| N | -3.743002000 | -4.298913000                                      | -0.085040000 | N | -4.715388000 | -3.217798000                            | 0.057417000  |
| N | 0.482910000  | -5.179922000                                      | -0.145444000 | N | -0.850680000 | -5.138528000                            | -0.108058000 |
| B | -0.470875000 | -6.262909000                                      | -0.165434000 | B | -2.046447000 | -5.945919000                            | -0.070432000 |
| N | -1.853604000 | -5.949196000                                      | -0.136966000 | N | -3.304269000 | -5.295107000                            | 0.006171000  |
| N | 1.474396000  | -0.285890000                                      | 0.033185000  | N | 1.344721000  | -0.649796000                            | -0.001475000 |
| H | 6.549533000  | 3.572492000                                       | -0.115879000 | H | 7.227544000  | 1.806641000                             | -0.090921000 |
| H | 4.667774000  | 5.221265000                                       | -0.124728000 | H | 5.823738000  | 3.876983000                             | -0.006209000 |
| H | 2.792494000  | 6.885359000                                       | -0.121747000 | H | 4.425769000  | 5.961995000                             | 0.031937000  |
| H | 0.306198000  | 7.188976000                                       | -0.104689000 | H | 2.096928000  | 6.880431000                             | -0.005583000 |
| H | -2.087230000 | 6.399089000                                       | -0.118785000 | H | -0.418988000 | 6.714450000                             | -0.140221000 |
| H | -4.491707000 | 5.576633000                                       | -0.256372000 | H | -2.941578000 | 6.513980000                             | -0.423850000 |
| H | -6.252419000 | 3.806573000                                       | -0.456754000 | H | -5.077962000 | 5.238883000                             | -0.699918000 |
| H | -6.727114000 | 1.374177000                                       | -0.513828000 | H | -6.152897000 | 3.000852000                             | -0.709653000 |
| H | -7.235935000 | -1.052428000                                      | -0.464037000 | H | -7.266874000 | 0.787333000                             | -0.531115000 |
| H | -6.303538000 | -3.364796000                                      | -0.253996000 | H | -6.954787000 | -1.671004000                            | -0.182413000 |
| H | -4.408316000 | -5.057996000                                      | -0.123133000 | H | -5.551880000 | -3.783566000                            | 0.037685000  |
| H | -2.511363000 | -6.715299000                                      | -0.150373000 | H | -4.133250000 | -5.871298000                            | 0.024865000  |
| H | -0.103970000 | -7.401829000                                      | -0.206232000 | H | -1.979036000 | -7.141174000                            | -0.104694000 |
| H | 2.269757000  | -6.598834000                                      | -0.216599000 | H | 0.519213000  | -6.959470000                            | -0.249914000 |
| H | 4.643987000  | -5.814279000                                      | -0.206760000 | H | 3.013185000  | -6.793828000                            | -0.360034000 |
| H | 6.164323000  | -3.829183000                                      | -0.149908000 | H | 4.983714000  | -5.254126000                            | -0.346511000 |
| H | 6.681186000  | -1.341072000                                      | -0.093971000 | H | 6.112654000  | -2.978706000                            | -0.252090000 |
| H | 7.174691000  | 1.152090000                                       | -0.097659000 | H | 7.220572000  | -0.692033000                            | -0.178964000 |
| B | 0.999139000  | 1.071570000                                       | 0.000032000  | B | 1.223027000  | 0.784854000                             | 0.021487000  |
| N | -0.420354000 | 1.337181000                                       | 0.023005000  | N | -0.078670000 | 1.401124000                             | 0.060830000  |
| C | -1.364499000 | 0.294574000                                       | 0.404599000  | C | -1.275675000 | 0.639582000                             | 0.449608000  |
| N | -1.485144000 | 0.504403000                                       | 1.936829000  | N | -1.448971000 | 0.835182000                             | 1.907297000  |
| N | -1.191022000 | -0.399913000                                      | 2.710755000  | N | -0.635605000 | 0.055668000                             | 2.637391000  |
| H | -0.877182000 | -1.254015000                                      | 2.191506000  | H | -0.486079000 | -0.899392000                            | 2.312622000  |
|   |              |                                                   |              | H | -0.849849000 | 0.116790000                             | 3.623884000  |
|   |              | <b>H<sub>3</sub>N<sub>2</sub>-C<sub>B</sub>BN</b> |              |   |              | <b>H<sub>3</sub>NHN-C<sub>B</sub>BN</b> |              |
| N | 2.589803000  | -4.395091000                                      | -0.430626000 | N | -3.587251000 | 3.576412000                             | -0.394842000 |
| B | 3.988329000  | -4.744501000                                      | -0.466706000 | B | -5.023363000 | 3.533451000                             | -0.523366000 |
| B | 1.604034000  | -5.426817000                                      | -0.555368000 | B | -2.923245000 | 4.847190000                             | -0.376527000 |
| B | -0.768708000 | -6.149363000                                      | -0.481042000 | B | -0.838029000 | 6.179477000                             | -0.181505000 |
| B | -2.581219000 | -4.468213000                                      | -0.120369000 | B | 1.368578000  | 5.023823000                             | 0.011763000  |
| B | -0.192030000 | -3.719652000                                      | -0.196131000 | B | -0.731297000 | 3.673190000                             | -0.070052000 |
| B | 2.183143000  | -3.018038000                                      | -0.190900000 | B | -2.830029000 | 2.347594000                             | -0.221772000 |
| B | 4.595024000  | -2.347744000                                      | -0.106566000 | B | -4.959804000 | 1.043506000                             | -0.338575000 |
| B | 2.773221000  | -0.635980000                                      | 0.038710000  | B | -2.742441000 | -0.117057000                            | -0.149006000 |
| B | -1.981871000 | -2.041429000                                      | 0.034893000  | B | 1.442112000  | 2.514504000                             | 0.006644000  |
| B | -3.809004000 | -0.327186000                                      | -0.027818000 | B | 3.661348000  | 1.357067000                             | -0.084368000 |
| B | 0.974145000  | 1.067875000                                       | -0.004278000 | B | -0.551294000 | -1.281265000                            | -0.032944000 |
| B | 3.375609000  | 1.795581000                                       | -0.031124000 | B | -2.663053000 | -2.623503000                            | -0.195328000 |
| B | 1.565875000  | 3.509548000                                       | -0.119127000 | B | -0.462600000 | -3.789694000                            | -0.089589000 |
| B | -0.830340000 | 2.810582000                                       | -0.087894000 | B | 1.650152000  | -2.467449000                            | -0.005866000 |
| B | -3.221840000 | 2.095514000                                       | -0.111773000 | B | 3.754624000  | -1.133494000                            | -0.072287000 |
| B | -5.046868000 | 3.815154000                                       | -0.209633000 | B | 5.978566000  | -2.296528000                            | -0.109907000 |
| B | -2.645642000 | 4.532640000                                       | -0.203935000 | B | 3.863909000  | -3.636909000                            | -0.032118000 |
| B | -0.242292000 | 5.242313000                                       | -0.209808000 | B | 1.743855000  | -4.971199000                            | -0.025837000 |
| B | 2.163212000  | 5.944621000                                       | -0.227018000 | B | -0.380710000 | -6.298317000                            | -0.105468000 |

|   |              |              |              |   |              |              |              |
|---|--------------|--------------|--------------|---|--------------|--------------|--------------|
| N | -2.138348000 | -5.823096000 | -0.301254000 | N | 0.571305000  | 6.219701000  | -0.041697000 |
| N | 0.215443000  | -5.096116000 | -0.437734000 | N | -1.502672000 | 4.897038000  | -0.216746000 |
| N | 4.959871000  | -3.726385000 | -0.281496000 | N | -5.682057000 | 2.276910000  | -0.475357000 |
| N | 3.195148000  | -2.004821000 | -0.044963000 | N | -3.522588000 | 1.090330000  | -0.215557000 |
| N | 0.788362000  | -2.667786000 | -0.135333000 | N | -1.397073000 | 2.388477000  | -0.060275000 |
| N | -1.592197000 | -3.419755000 | -0.053393000 | N | 0.695767000  | 3.745595000  | 0.028291000  |
| N | -3.392061000 | -1.701181000 | 0.010795000  | N | 2.888102000  | 2.569286000  | -0.050265000 |
| N | 1.364039000  | -0.308249000 | 0.102698000  | N | -1.305179000 | -0.051085000 | -0.026594000 |
| N | 3.772426000  | 0.415957000  | 0.013650000  | N | -3.418916000 | -1.397946000 | -0.223897000 |
| N | 1.971339000  | 2.124299000  | -0.059817000 | N | -1.228365000 | -2.562239000 | -0.112573000 |
| N | -2.809089000 | 0.712225000  | -0.055671000 | N | 2.980859000  | 0.087054000  | -0.075601000 |
| N | -4.635389000 | 2.433430000  | -0.141059000 | N | 5.206671000  | -1.077077000 | -0.112533000 |
| N | -2.233970000 | 3.146349000  | -0.129216000 | N | 3.091289000  | -2.413049000 | -0.029499000 |
| N | 0.165492000  | 3.855024000  | -0.133805000 | N | 0.974551000  | -3.744616000 | -0.029132000 |
| N | 2.568974000  | 4.561202000  | -0.154998000 | N | -1.145778000 | -5.072804000 | -0.130694000 |
| N | 0.778057000  | 6.254284000  | -0.254317000 | N | 1.034611000  | -6.223076000 | -0.048157000 |
| N | -1.639793000 | 5.550918000  | -0.235690000 | N | 3.172024000  | -4.890966000 | -0.007115000 |
| N | -4.052295000 | 4.827933000  | -0.240953000 | N | 5.297847000  | -3.541822000 | -0.065079000 |
| B | -4.391308000 | -2.752397000 | 0.000986000  | B | 3.569561000  | 3.848160000  | -0.033203000 |
| B | -6.215699000 | -1.029180000 | -0.014947000 | B | 5.788830000  | 2.683500000  | -0.126791000 |
| B | -5.625256000 | 1.392331000  | -0.103282000 | B | 5.875833000  | 0.193240000  | -0.145957000 |
| N | -3.967112000 | -4.115457000 | -0.027791000 | N | 2.797289000  | 5.050248000  | 0.021815000  |
| N | -5.782412000 | -2.378384000 | 0.012069000  | N | 5.007700000  | 3.865889000  | -0.077174000 |
| N | -5.221344000 | 0.017595000  | -0.041791000 | N | 5.113651000  | 1.408573000  | -0.125455000 |
| B | 5.182340000  | 0.076397000  | 0.007759000  | B | -4.864424000 | -1.454720000 | -0.302174000 |
| B | 3.965649000  | 4.225639000  | -0.118239000 | B | -2.577125000 | -5.124623000 | -0.208783000 |
| N | 5.566637000  | -1.298784000 | -0.012509000 | N | -5.608938000 | -0.232836000 | -0.311779000 |
| N | 4.374021000  | 2.852376000  | -0.050447000 | N | -3.341401000 | -3.907979000 | -0.240307000 |
| B | 5.777391000  | 2.514443000  | -0.020872000 | B | -4.779746000 | -3.961374000 | -0.325926000 |
| N | 6.146823000  | 1.146419000  | 0.015079000  | N | -5.504999000 | -2.741352000 | -0.348398000 |
| N | -0.422552000 | 1.430716000  | 0.008300000  | N | 0.882473000  | -1.248129000 | 0.026647000  |
| H | -6.208618000 | 4.105778000  | -0.239736000 | H | 7.175467000  | -2.261701000 | -0.146178000 |
| H | -6.788954000 | 1.674352000  | -0.122684000 | H | 7.071814000  | 0.237966000  | -0.187972000 |
| H | -7.383935000 | -0.763449000 | -0.018792000 | H | 6.984653000  | 2.744715000  | -0.167394000 |
| H | -6.487995000 | -3.100738000 | 0.017957000  | H | 5.491911000  | 4.751935000  | -0.071502000 |
| H | -4.663187000 | -4.846299000 | -0.066560000 | H | 3.273568000  | 5.940845000  | 0.013683000  |
| H | -2.814482000 | -6.571280000 | -0.346876000 | H | 1.022315000  | 7.122930000  | -0.036758000 |
| H | -0.437141000 | -7.286390000 | -0.663542000 | H | -1.468691000 | 7.193877000  | -0.272736000 |
| H | 1.939857000  | -6.560670000 | -0.745143000 | H | -3.553651000 | 5.857907000  | -0.493739000 |
| H | 4.329546000  | -5.879206000 | -0.646045000 | H | -5.652496000 | 4.543117000  | -0.661229000 |
| H | 5.934250000  | -3.987232000 | -0.321005000 | H | -6.687034000 | 2.263856000  | -0.570648000 |
| H | 6.548249000  | -1.533952000 | -0.047772000 | H | -6.614766000 | -0.273263000 | -0.396485000 |
| H | 7.131724000  | 0.923781000  | 0.023068000  | H | -6.511641000 | -2.792106000 | -0.409741000 |
| H | 6.612537000  | 3.373354000  | -0.029026000 | H | -5.354085000 | -5.011264000 | -0.373693000 |
| H | 4.788002000  | 5.095656000  | -0.143785000 | H | -3.138258000 | -6.181689000 | -0.248238000 |
| H | 2.979402000  | 6.820515000  | -0.264457000 | H | -0.932244000 | -7.361368000 | -0.135685000 |
| H | 0.513779000  | 7.227264000  | -0.310108000 | H | 1.552665000  | -7.089777000 | -0.039926000 |
| H | -1.925557000 | 6.518245000  | -0.291933000 | H | 3.710173000  | -5.745850000 | -0.010128000 |
| H | -4.359360000 | 5.788355000  | -0.294094000 | H | 5.854568000  | -4.384122000 | -0.067208000 |
| B | -1.397871000 | 0.367247000  | -0.003277000 | B | 1.533687000  | 0.036276000  | -0.010021000 |
| N | -0.977116000 | -1.000070000 | 0.100224000  | N | 0.750409000  | 1.245760000  | 0.005852000  |
| C | 0.413885000  | -1.401420000 | 0.497667000  | C | -0.660790000 | 1.200591000  | 0.413202000  |
| N | 0.499607000  | -1.698943000 | 1.892291000  | N | -0.702862000 | 1.298932000  | 1.862914000  |
| N | 0.144242000  | -0.501029000 | 2.602116000  | N | -3.296035000 | -0.196766000 | 2.825846000  |
| H | -0.819360000 | -0.168236000 | 2.415240000  | H | -3.080172000 | -1.180308000 | 2.687685000  |
| H | 0.211638000  | -0.727372000 | 3.592917000  | H | -3.392928000 | -0.050096000 | 3.827082000  |
| H | 0.769912000  | 0.304028000  | 2.414649000  | H | -4.209880000 | -0.042240000 | 2.408222000  |
|   |              |              |              | H | -1.639068000 | 0.959625000  | 2.149732000  |

| <b>HHN<sub>2</sub>-C<sub>B</sub>BN</b> |              |              |              | <b>H<sub>2</sub>HN<sub>2</sub>-C<sub>B</sub>BN</b> |              |              |              |
|----------------------------------------|--------------|--------------|--------------|----------------------------------------------------|--------------|--------------|--------------|
| N                                      | -5.070363000 | 0.656243000  | -0.296661000 | N                                                  | -5.112740000 | -0.051484000 | -0.371098000 |
| B                                      | -6.210540000 | -0.231374000 | -0.264266000 | B                                                  | -6.115491000 | -1.091655000 | -0.392358000 |
| B                                      | -5.278685000 | 2.059284000  | -0.491847000 | B                                                  | -5.514680000 | 1.313756000  | -0.518302000 |
| B                                      | -4.379139000 | 4.370816000  | -0.575843000 | B                                                  | -4.950195000 | 3.731145000  | -0.491949000 |
| B                                      | -1.935561000 | 4.780936000  | -0.245408000 | B                                                  | -2.587111000 | 4.465994000  | -0.139249000 |
| B                                      | -2.816253000 | 2.437916000  | -0.222797000 | B                                                  | -3.133134000 | 2.022332000  | -0.197819000 |
| B                                      | -3.732819000 | 0.130113000  | -0.092758000 | B                                                  | -3.715454000 | -0.391425000 | -0.154239000 |
| B                                      | -4.678907000 | -2.181059000 | 0.040373000  | B                                                  | -4.331314000 | -2.812293000 | -0.077211000 |
| B                                      | -2.202484000 | -1.793787000 | 0.058875000  | B                                                  | -1.932047000 | -2.082230000 | 0.009325000  |
| B                                      | -0.387742000 | 2.815944000  | -0.024576000 | B                                                  | -0.778371000 | 2.729602000  | 0.004365000  |
| B                                      | 2.085594000  | 3.203206000  | -0.009547000 | B                                                  | 1.618004000  | 3.457768000  | -0.029532000 |
| B                                      | 0.258502000  | -1.418901000 | -0.017524000 | B                                                  | 0.447649000  | -1.370741000 | -0.014209000 |
| B                                      | -0.652448000 | -3.754316000 | -0.098881000 | B                                                  | -0.124626000 | -3.812564000 | -0.051255000 |
| B                                      | 1.812174000  | -3.380801000 | -0.185436000 | B                                                  | 2.261937000  | -3.102348000 | -0.129669000 |
| B                                      | 2.736264000  | -1.068253000 | -0.057131000 | B                                                  | 2.851524000  | -0.681327000 | -0.111621000 |
| B                                      | 3.638790000  | 1.254177000  | -0.010385000 | B                                                  | 3.425552000  | 1.744014000  | -0.096106000 |
| B                                      | 6.118156000  | 1.638714000  | -0.013135000 | B                                                  | 5.827432000  | 2.471435000  | -0.156714000 |
| B                                      | 5.210826000  | -0.695417000 | -0.090253000 | B                                                  | 5.252041000  | 0.032840000  | -0.182980000 |
| B                                      | 4.291723000  | -3.023390000 | -0.212652000 | B                                                  | 4.667189000  | -2.403352000 | -0.205520000 |
| B                                      | 3.362511000  | -5.345846000 | -0.356298000 | B                                                  | 4.074217000  | -4.837103000 | -0.220216000 |
| N                                      | -3.276950000 | 5.253220000  | -0.448668000 | N                                                  | -3.982814000 | 4.754493000  | -0.320795000 |
| N                                      | -4.155077000 | 2.947978000  | -0.461125000 | N                                                  | -4.529508000 | 2.351753000  | -0.431415000 |
| N                                      | -5.996952000 | -1.618037000 | -0.063013000 | N                                                  | -5.713345000 | -2.439006000 | -0.215974000 |
| N                                      | -3.544835000 | -1.282510000 | 0.057995000  | N                                                  | -3.336025000 | -1.766741000 | -0.029705000 |
| N                                      | -2.591215000 | 1.020059000  | -0.065645000 | N                                                  | -2.712583000 | 0.649284000  | -0.087344000 |
| N                                      | -1.719262000 | 3.355135000  | -0.113231000 | N                                                  | -2.173625000 | 3.082095000  | -0.051064000 |
| N                                      | 0.741491000  | 3.717040000  | -0.051183000 | N                                                  | 0.215042000  | 3.782403000  | -0.017203000 |
| N                                      | -1.077892000 | -0.876538000 | 0.082054000  | N                                                  | -0.951378000 | -1.020959000 | 0.029641000  |
| N                                      | -1.985587000 | -3.220212000 | -0.005936000 | N                                                  | -1.521742000 | -3.469574000 | -0.019655000 |
| N                                      | 0.467474000  | -2.847074000 | -0.120732000 | N                                                  | 0.858481000  | -2.761009000 | -0.076305000 |
| N                                      | 2.289846000  | 1.777853000  | 0.001491000  | N                                                  | 2.017366000  | 2.075719000  | -0.046554000 |
| N                                      | 4.772324000  | 2.162773000  | 0.003952000  | N                                                  | 4.422391000  | 2.803196000  | -0.107093000 |
| N                                      | 3.862509000  | -0.168476000 | -0.045531000 | N                                                  | 3.845174000  | 0.367893000  | -0.129442000 |
| N                                      | 2.945193000  | -2.492413000 | -0.150494000 | N                                                  | 3.261883000  | -2.064614000 | -0.149905000 |
| N                                      | 2.021126000  | -4.814976000 | -0.280140000 | N                                                  | 2.672700000  | -4.497271000 | -0.160701000 |
| N                                      | 4.460284000  | -4.447099000 | -0.319794000 | N                                                  | 5.035804000  | -3.792926000 | -0.242330000 |
| N                                      | 5.395056000  | -2.112910000 | -0.167400000 | N                                                  | 5.633481000  | -1.345959000 | -0.220599000 |
| N                                      | 6.308176000  | 0.232888000  | -0.060818000 | N                                                  | 6.210565000  | 1.105982000  | -0.194897000 |
| B                                      | 0.529188000  | 5.150704000  | -0.103770000 | B                                                  | -0.194924000 | 5.172826000  | -0.028720000 |
| B                                      | 3.006245000  | 5.533811000  | -0.024130000 | B                                                  | 2.206867000  | 5.894906000  | -0.017727000 |
| B                                      | 4.557568000  | 3.582157000  | 0.018896000  | B                                                  | 4.013607000  | 4.177906000  | -0.070056000 |
| N                                      | -0.807337000 | 5.653867000  | -0.185577000 | N                                                  | -1.590012000 | 5.486899000  | -0.060878000 |
| N                                      | 1.673954000  | 6.019278000  | -0.078618000 | N                                                  | 0.819349000  | 6.192246000  | -0.012042000 |
| N                                      | 3.221269000  | 4.107626000  | 0.002222000  | N                                                  | 2.617353000  | 4.512622000  | -0.032519000 |
| B                                      | -3.117208000 | -4.127977000 | 0.025542000  | B                                                  | -2.516082000 | -4.523388000 | -0.008015000 |
| B                                      | 0.897737000  | -5.709096000 | -0.278547000 | B                                                  | 1.685028000  | -5.538657000 | -0.126521000 |
| N                                      | -4.439605000 | -3.588644000 | 0.093683000  | N                                                  | -3.903056000 | -4.174234000 | -0.008645000 |
| N                                      | -0.436020000 | -5.187647000 | -0.173443000 | N                                                  | 0.290246000  | -5.205946000 | -0.068828000 |
| B                                      | -1.562397000 | -6.089147000 | -0.136582000 | B                                                  | -0.701016000 | -6.253400000 | -0.039420000 |
| N                                      | -2.866868000 | -5.542689000 | -0.026274000 | N                                                  | -2.072112000 | -5.891933000 | -0.004058000 |
| N                                      | 1.394303000  | -0.542190000 | 0.018040000  | N                                                  | 1.455135000  | -0.346129000 | -0.053258000 |
| H                                      | 7.059862000  | 2.378538000  | 0.006577000  | H                                                  | 6.657940000  | 3.335022000  | -0.165257000 |
| H                                      | 5.492174000  | 4.330118000  | 0.036264000  | H                                                  | 4.836330000  | 5.048113000  | -0.072501000 |
| H                                      | 3.930245000  | 6.295410000  | -0.006718000 | H                                                  | 3.018461000  | 6.775891000  | -0.012976000 |
| H                                      | 1.537378000  | 7.019484000  | -0.102592000 | H                                                  | 0.544761000  | 7.163891000  | -0.010035000 |
| H                                      | -0.952093000 | 6.650870000  | -0.258063000 | H                                                  | -1.873598000 | 6.455177000  | -0.108141000 |
| H                                      | -3.449953000 | 6.243753000  | -0.540004000 | H                                                  | -4.292307000 | 5.713678000  | -0.379925000 |

|   |              |                                                                |              |   |              |                                                     |              |
|---|--------------|----------------------------------------------------------------|--------------|---|--------------|-----------------------------------------------------|--------------|
| H | -5.480722000 | 4.799105000                                                    | -0.767187000 | H | -6.100735000 | 4.007580000                                         | -0.677073000 |
| H | -6.381548000 | 2.488678000                                                    | -0.667316000 | H | -6.665398000 | 1.588522000                                         | -0.700264000 |
| H | -7.318256000 | 0.200316000                                                    | -0.406569000 | H | -7.270699000 | -0.819354000                                        | -0.555123000 |
| H | -6.802686000 | -2.226395000                                                   | -0.061581000 | H | -6.424761000 | -3.154679000                                        | -0.247116000 |
| H | -5.226878000 | -4.221426000                                                   | 0.087797000  | H | -4.594568000 | -4.909984000                                        | -0.033254000 |
| H | -3.645994000 | -6.184608000                                                   | -0.002545000 | H | -2.756250000 | -6.634397000                                        | 0.011761000  |
| H | -1.400839000 | -7.274036000                                                   | -0.199633000 | H | -0.375674000 | -7.406565000                                        | -0.046684000 |
| H | 1.073035000  | -6.890335000                                                   | -0.362138000 | H | 2.025385000  | -6.686839000                                        | -0.147364000 |
| H | 3.547158000  | -6.525497000                                                   | -0.449435000 | H | 4.423886000  | -5.982745000                                        | -0.250578000 |
| H | 5.390305000  | -4.836945000                                                   | -0.371609000 | H | 6.011206000  | -4.050445000                                        | -0.283389000 |
| H | 6.334690000  | -2.482033000                                                   | -0.204590000 | H | 6.615095000  | -1.581224000                                        | -0.258833000 |
| H | 7.256279000  | -0.114001000                                                   | -0.080297000 | H | 7.197045000  | 0.893678000                                         | -0.231078000 |
| B | 1.159146000  | 0.875835000                                                    | 0.041452000  | B | 1.022686000  | 1.018582000                                         | -0.003429000 |
| N | -0.194156000 | 1.384870000                                                    | 0.073265000  | N | -0.386158000 | 1.341254000                                         | 0.076796000  |
| C | -1.317955000 | 0.516462000                                                    | 0.450445000  | C | -1.383789000 | 0.312732000                                         | 0.436924000  |
| N | -1.486440000 | 0.548969000                                                    | 1.936834000  | N | -1.580211000 | 0.268528000                                         | 1.902430000  |
| N | -0.562088000 | 0.109364000                                                    | 2.800856000  | N | -0.359014000 | 0.064007000                                         | 2.582864000  |
| H | -0.105741000 | -0.686003000                                                   | 2.340273000  | H | -0.553372000 | -0.450060000                                        | 3.433688000  |
| H | -1.896411000 | 1.424749000                                                    | 2.247074000  | H | -2.031054000 | 1.140570000                                         | 2.180362000  |
|   |              |                                                                |              | H | 0.100085000  | 0.940529000                                         | 2.821999000  |
|   |              | <b>H<sub>2</sub>H<sub>2</sub>N<sub>2</sub>-C<sub>B</sub>BN</b> |              |   |              | <b>H<sub>3</sub>NH<sub>2</sub>N-C<sub>B</sub>BN</b> |              |
| N | -2.733701000 | -4.401729000                                                   | -0.055596000 | N | 4.618150000  | -2.038700000                                        | -0.256520000 |
| B | -2.373780000 | -5.799688000                                                   | -0.005666000 | B | 5.945595000  | -1.488576000                                        | -0.378426000 |
| B | -4.117621000 | -4.034119000                                                   | -0.042355000 | B | 4.453533000  | -3.461354000                                        | -0.219611000 |
| B | -5.871431000 | -2.279287000                                                   | -0.094564000 | B | 2.969337000  | -5.445618000                                        | -0.135354000 |
| B | -5.229147000 | 0.135312000                                                    | -0.175409000 | B | 0.489729000  | -5.151819000                                        | -0.080580000 |
| B | -3.449584000 | -1.622492000                                                   | -0.179269000 | B | 1.976007000  | -3.135422000                                        | -0.045018000 |
| B | -1.699473000 | -3.385029000                                                   | -0.147079000 | B | 3.458425000  | -1.160365000                                        | -0.165585000 |
| B | 0.045824000  | -5.178472000                                                   | -0.099076000 | B | 4.983007000  | 0.817122000                                         | -0.389473000 |
| B | 0.692753000  | -2.755218000                                                   | -0.199322000 | B | 2.495855000  | 1.107103000                                         | -0.204696000 |
| B | -2.798880000 | 0.762446000                                                    | -0.208066000 | B | -0.470885000 | -2.832325000                                        | -0.060422000 |
| B | -2.151720000 | 3.178613000                                                    | -0.097382000 | B | -2.956737000 | -2.536619000                                        | -0.163729000 |
| B | 1.350046000  | -0.358340000                                                   | -0.221409000 | B | 0.042855000  | 1.419508000                                         | -0.010320000 |
| B | 3.118333000  | -2.128209000                                                   | -0.199231000 | B | 1.528586000  | 3.420878000                                         | -0.259023000 |
| B | 3.770833000  | 0.271583000                                                    | -0.226757000 | B | -0.935088000 | 3.730493000                                         | -0.047978000 |
| B | 2.017114000  | 2.046672000                                                    | -0.209782000 | B | -2.435030000 | 1.744080000                                         | 0.077705000  |
| B | 0.257678000  | 3.811715000                                                    | -0.102544000 | B | -3.931082000 | -0.246796000                                        | -0.022456000 |
| B | 0.908051000  | 6.233702000                                                    | 0.002501000  | B | -6.422878000 | 0.048505000                                         | -0.012266000 |
| B | 2.676166000  | 4.462468000                                                    | -0.112999000 | B | -4.920664000 | 2.049612000                                         | 0.123006000  |
| B | 4.439782000  | 2.684958000                                                    | -0.185454000 | B | -3.412994000 | 4.050106000                                         | 0.120276000  |
| B | 6.201238000  | 0.902578000                                                    | -0.211710000 | B | -1.903631000 | 6.045484000                                         | -0.026918000 |
| N | -6.220254000 | -0.906832000                                                   | -0.145585000 | N | 1.660273000  | -5.986595000                                        | -0.088723000 |
| N | -4.475134000 | -2.649116000                                                   | -0.098679000 | N | 3.136235000  | -4.011411000                                        | -0.135575000 |
| N | -1.002979000 | -6.159510000                                                   | -0.032932000 | N | 6.106777000  | -0.079217000                                        | -0.417415000 |
| N | -0.319515000 | -3.781237000                                                   | -0.167235000 | N | 3.660240000  | 0.260033000                                         | -0.239379000 |
| N | -2.048455000 | -1.982902000                                                   | -0.217574000 | N | 2.135205000  | -1.703146000                                        | -0.001813000 |
| N | -3.833633000 | -0.240781000                                                   | -0.217998000 | N | 0.664417000  | -3.718396000                                        | -0.005674000 |
| N | -3.167117000 | 2.159121000                                                    | -0.136166000 | N | -1.801537000 | -3.395489000                                        | -0.170123000 |
| N | 0.303009000  | -1.365390000                                                   | -0.261234000 | N | 1.186768000  | 0.536962000                                         | -0.038745000 |
| N | 2.087759000  | -3.134792000                                                   | -0.164555000 | N | 2.670082000  | 2.543302000                                         | -0.319044000 |
| N | 2.745950000  | -0.742460000                                                   | -0.246455000 | N | 0.214407000  | 2.855617000                                         | -0.113282000 |
| N | -0.765980000 | 2.792018000                                                    | -0.132804000 | N | -2.773927000 | -1.111856000                                        | -0.069893000 |
| N | -0.114843000 | 5.215767000                                                    | -0.028231000 | N | -5.268245000 | -0.815678000                                        | -0.077530000 |
| N | 1.649958000  | 3.442781000                                                    | -0.144324000 | N | -3.764599000 | 1.180842000                                         | 0.074320000  |
| N | 3.411401000  | 1.667728000                                                    | -0.208065000 | N | -2.259554000 | 3.177951000                                         | 0.066666000  |
| N | 5.174699000  | -0.111957000                                                   | -0.218075000 | N | -0.755727000 | 5.172551000                                         | -0.107779000 |
| N | 5.816919000  | 2.268829000                                                    | -0.197585000 | N | -3.195921000 | 5.472496000                                         | 0.097447000  |
| N | 4.050363000  | 4.061938000                                                    | -0.146691000 | N | -4.718762000 | 3.466381000                                         | 0.181747000  |



|                                       |              |              |              |                                       |              |              |              |
|---------------------------------------|--------------|--------------|--------------|---------------------------------------|--------------|--------------|--------------|
| N                                     | 2.271407000  | 5.840685000  | -0.043574000 | N                                     | -6.228160000 | 1.450287000  | 0.099407000  |
| B                                     | -4.563960000 | 2.542495000  | -0.110164000 | B                                     | -1.983348000 | -4.831433000 | -0.224055000 |
| B                                     | -3.911808000 | 4.961610000  | 0.005587000  | B                                     | -4.470009000 | -4.527626000 | -0.343010000 |
| B                                     | -1.499971000 | 5.591282000  | 0.013778000  | B                                     | -5.440692000 | -2.235549000 | -0.201531000 |
| N                                     | -5.567500000 | 1.523635000  | -0.150502000 | N                                     | -0.834600000 | -5.681954000 | -0.163381000 |
| N                                     | -4.895785000 | 3.940639000  | -0.040807000 | N                                     | -3.318440000 | -5.356299000 | -0.331279000 |
| N                                     | -2.520590000 | 4.582814000  | -0.025055000 | N                                     | -4.294778000 | -3.099532000 | -0.244241000 |
| B                                     | 2.459373000  | -4.534273000 | -0.120994000 | B                                     | 3.994236000  | 3.110584000  | -0.467504000 |
| B                                     | 5.539353000  | -1.500020000 | -0.201260000 | B                                     | 0.557757000  | 5.727632000  | -0.266197000 |
| N                                     | 1.431017000  | -5.528595000 | -0.090179000 | N                                     | 5.127810000  | 2.236487000  | -0.481213000 |
| N                                     | 4.520936000  | -2.511950000 | -0.182667000 | N                                     | 1.701434000  | 4.861598000  | -0.347665000 |
| B                                     | 4.887244000  | -3.905570000 | -0.139719000 | B                                     | 3.018927000  | 5.420420000  | -0.519207000 |
| N                                     | 3.855468000  | -4.879544000 | -0.108520000 | N                                     | 4.129617000  | 4.537947000  | -0.575986000 |
| N                                     | 0.994905000  | 1.035538000  | -0.266050000 | N                                     | -1.285207000 | 0.877911000  | 0.070493000  |
| H                                     | 0.614815000  | 7.393452000  | 0.069079000  | H                                     | -7.529572000 | -0.408644000 | -0.054100000 |
| H                                     | -1.803690000 | 6.747754000  | 0.081702000  | H                                     | -6.541917000 | -2.701767000 | -0.267614000 |
| H                                     | -4.232085000 | 6.114288000  | 0.069978000  | H                                     | -5.564041000 | -5.008422000 | -0.429062000 |
| H                                     | -5.866131000 | 4.219111000  | -0.021448000 | H                                     | -3.455175000 | -6.355184000 | -0.386565000 |
| H                                     | -6.540598000 | 1.792575000  | -0.122090000 | H                                     | -0.961422000 | -6.682573000 | -0.216363000 |
| H                                     | -7.200264000 | -0.665014000 | -0.129609000 | H                                     | 1.559677000  | -6.990757000 | -0.116049000 |
| H                                     | -6.721727000 | -3.121555000 | -0.046950000 | H                                     | 3.923602000  | -6.168737000 | -0.177859000 |
| H                                     | -4.965937000 | -4.876431000 | 0.015485000  | H                                     | 5.409008000  | -4.181295000 | -0.265278000 |
| H                                     | -3.221689000 | -6.643408000 | 0.057904000  | H                                     | 6.900955000  | -2.208933000 | -0.436662000 |
| H                                     | -0.769315000 | -7.140861000 | 0.007613000  | H                                     | 7.041111000  | 0.290033000  | -0.517334000 |
| H                                     | 1.691513000  | -6.503650000 | -0.051332000 | H                                     | 6.050803000  | 2.631553000  | -0.591543000 |
| H                                     | 4.124529000  | -5.852348000 | -0.081565000 | H                                     | 5.047672000  | 4.941912000  | -0.692036000 |
| H                                     | 6.037989000  | -4.238962000 | -0.127431000 | H                                     | 3.178851000  | 6.604064000  | -0.611134000 |
| H                                     | 6.694804000  | -1.816040000 | -0.195185000 | H                                     | 0.703654000  | 6.914419000  | -0.334113000 |
| H                                     | 7.360477000  | 0.598703000  | -0.213382000 | H                                     | -1.768234000 | 7.235245000  | -0.068748000 |
| H                                     | 6.548493000  | 2.964752000  | -0.190163000 | H                                     | -3.986741000 | 6.098730000  | 0.141703000  |
| H                                     | 4.767540000  | 4.773145000  | -0.128764000 | H                                     | -5.525161000 | 4.074059000  | 0.210809000  |
| H                                     | 2.972740000  | 6.566700000  | -0.020293000 | H                                     | -7.047870000 | 2.038644000  | 0.136194000  |
| B                                     | -0.394652000 | 1.393625000  | -0.211586000 | B                                     | -1.440280000 | -0.550269000 | 0.015954000  |
| N                                     | -1.411404000 | 0.363928000  | -0.270378000 | N                                     | -0.277614000 | -1.407585000 | 0.008664000  |
| C                                     | -1.053938000 | -0.995418000 | -0.477743000 | C                                     | 1.009056000  | -0.840726000 | 0.449399000  |
| N                                     | -0.123546000 | -0.252207000 | 2.733615000  | N                                     | 0.944401000  | -0.747068000 | 1.898738000  |
| N                                     | 1.295084000  | -0.263687000 | 2.612954000  | N                                     | 3.666999000  | 0.464647000  | 2.861073000  |
| H                                     | 1.738227000  | -0.919616000 | 3.253126000  | H                                     | 3.684816000  | 1.380269000  | 2.419326000  |
| H                                     | -0.429284000 | -0.504870000 | 3.671381000  | H                                     | 3.848109000  | 0.606785000  | 3.851169000  |
| H                                     | 1.631303000  | 0.666807000  | 2.835264000  | H                                     | 4.456653000  | -0.048384000 | 2.478531000  |
| H                                     | -0.475955000 | -0.952844000 | 2.089428000  | H                                     | 1.826721000  | -0.369409000 | 2.264024000  |
|                                       |              |              |              | H                                     | 0.821292000  | -1.680637000 | 2.285347000  |
| <b>H<sub>2</sub>N-C<sub>B</sub>BN</b> |              |              |              | <b>H<sub>3</sub>N-C<sub>B</sub>BN</b> |              |              |              |
| N                                     | -4.752692000 | -1.939804000 | -0.174518000 | N                                     | -5.015439000 | 1.221103000  | -0.019721000 |
| B                                     | -5.295881000 | -3.275057000 | -0.261827000 | B                                     | -6.239354000 | 0.453161000  | -0.013452000 |
| B                                     | -5.646631000 | -0.822325000 | -0.204284000 | B                                     | -5.085139000 | 2.649806000  | 0.047433000  |
| B                                     | -6.019993000 | 1.627311000  | -0.113823000 | B                                     | -3.946193000 | 4.854970000  | 0.052151000  |
| B                                     | -4.075293000 | 3.187660000  | 0.021921000  | B                                     | -1.453196000 | 4.982947000  | -0.077742000 |
| B                                     | -3.681301000 | 0.713431000  | 0.029746000  | B                                     | -2.585292000 | 2.750134000  | -0.092132000 |
| B                                     | -3.319808000 | -1.736569000 | -0.024236000 | B                                     | -3.732716000 | 0.547216000  | -0.119058000 |
| B                                     | -2.987948000 | -4.218267000 | -0.121650000 | B                                     | -4.911857000 | -1.660661000 | -0.148709000 |
| B                                     | -1.030448000 | -2.651578000 | -0.001224000 | B                                     | -2.405837000 | -1.539058000 | -0.181170000 |
| B                                     | -1.749079000 | 2.244141000  | 0.034733000  | B                                     | -0.115124000 | 2.862534000  | -0.148429000 |
| B                                     | 0.206145000  | 3.802779000  | -0.116361000 | B                                     | 2.386426000  | 2.981735000  | -0.093789000 |
| B                                     | 0.918231000  | -1.113217000 | 0.082505000  | B                                     | 0.080864000  | -1.428461000 | -0.157503000 |
| B                                     | 1.292925000  | -3.586165000 | -0.078813000 | B                                     | -1.069214000 | -3.654785000 | -0.090000000 |
| B                                     | 3.247812000  | -2.042731000 | 0.012803000  | B                                     | 1.420150000  | -3.543527000 | -0.056740000 |
| B                                     | 2.891933000  | 0.423564000  | 0.064610000  | B                                     | 2.578108000  | -1.336202000 | -0.120981000 |

|   |              |              |              |   |              |              |              |
|---|--------------|--------------|--------------|---|--------------|--------------|--------------|
| B | 2.522759000  | 2.885252000  | -0.064823000 | B | 3.724651000  | 0.878382000  | -0.085965000 |
| B | 4.483298000  | 4.449326000  | -0.161571000 | B | 6.230140000  | 0.999851000  | -0.024189000 |
| B | 4.855890000  | 1.976762000  | -0.004156000 | B | 5.079484000  | -1.225924000 | -0.047191000 |
| B | 5.220233000  | -0.500320000 | 0.053827000  | B | 3.921904000  | -3.446912000 | -0.023151000 |
| B | 5.575594000  | -2.979960000 | 0.005985000  | B | 2.757735000  | -5.664419000 | 0.046358000  |
| N | -5.489813000 | 2.938394000  | -0.018275000 | N | -2.745848000 | 5.606779000  | -0.007082000 |
| N | -5.114355000 | 0.502527000  | -0.103112000 | N | -3.873498000 | 3.412606000  | 0.012432000  |
| N | -4.412416000 | -4.382161000 | -0.210794000 | N | -6.165634000 | -0.960037000 | -0.094266000 |
| N | -2.452096000 | -2.879926000 | 0.005372000  | N | -3.689924000 | -0.886536000 | -0.178112000 |
| N | -2.773070000 | -0.406501000 | 0.098793000  | N | -2.501462000 | 1.307027000  | -0.155118000 |
| N | -3.175836000 | 2.055956000  | 0.091725000  | N | -1.385905000 | 3.538771000  | -0.132097000 |
| N | -1.216483000 | 3.585275000  | -0.078635000 | N | 1.104049000  | 3.636990000  | -0.105220000 |
| N | -0.515047000 | -1.308584000 | 0.100928000  | N | -1.197071000 | -0.744203000 | -0.213441000 |
| N | -0.132966000 | -3.783303000 | -0.100580000 | N | -2.341795000 | -2.981656000 | -0.131835000 |
| N | 1.816026000  | -2.246962000 | -0.003546000 | N | 0.139001000  | -2.872672000 | -0.097655000 |
| N | 1.092401000  | 2.669842000  | -0.052572000 | N | 2.439297000  | 1.543246000  | -0.110046000 |
| N | 3.055353000  | 4.234953000  | -0.155878000 | N | 4.947662000  | 1.663467000  | -0.053665000 |
| N | 3.423980000  | 1.764418000  | 0.009446000  | N | 3.795205000  | -0.559388000 | -0.092438000 |
| N | 3.787756000  | -0.708475000 | 0.056516000  | N | 2.639596000  | -2.777459000 | -0.074379000 |
| N | 4.146493000  | -3.184886000 | -0.021613000 | N | 1.479044000  | -4.995025000 | -0.000386000 |
| N | 6.079195000  | -1.653780000 | 0.048934000  | N | 3.942697000  | -4.883946000 | 0.030628000  |
| N | 5.723760000  | 0.839603000  | 0.047451000  | N | 5.115357000  | -2.656385000 | -0.026472000 |
| N | 5.347030000  | 3.326505000  | -0.077104000 | N | 6.269631000  | -0.418409000 | -0.022953000 |
| B | -2.111432000 | 4.724968000  | -0.106380000 | B | 1.043410000  | 5.085738000  | -0.083624000 |
| B | -0.151009000 | 6.279783000  | -0.270094000 | B | 3.548465000  | 5.202243000  | -0.048299000 |
| B | 2.163604000  | 5.356498000  | -0.238248000 | B | 4.884349000  | 3.097054000  | -0.043949000 |
| N | -3.522496000 | 4.503828000  | -0.029052000 | N | -0.234233000 | 5.728532000  | -0.082197000 |
| N | -1.548814000 | 6.044153000  | -0.210338000 | N | 2.274626000  | 5.827556000  | -0.059974000 |
| N | 0.743047000  | 5.149480000  | -0.214408000 | N | 3.611230000  | 3.761500000  | -0.062952000 |
| B | -0.663657000 | -5.130118000 | -0.172908000 | B | -3.562811000 | -3.763517000 | -0.128176000 |
| B | 3.615516000  | -4.516308000 | -0.095579000 | B | 0.268377000  | -5.765587000 | 0.010542000  |
| N | -2.081029000 | -5.320720000 | -0.171744000 | N | -4.822746000 | -3.086526000 | -0.157845000 |
| N | 2.195287000  | -4.723855000 | -0.132683000 | N | -1.005743000 | -5.104971000 | -0.039672000 |
| B | 1.663928000  | -6.062029000 | -0.216848000 | B | -2.221604000 | -5.880438000 | -0.038540000 |
| N | 0.255847000  | -6.233655000 | -0.240064000 | N | -3.464450000 | -5.197039000 | -0.088212000 |
| N | 1.466540000  | 0.214474000  | 0.110583000  | N | 1.301196000  | -0.671152000 | -0.197250000 |
| H | 4.934561000  | 5.556375000  | -0.238996000 | H | 7.245613000  | 1.634863000  | 0.000883000  |
| H | 2.604751000  | 6.466289000  | -0.325488000 | H | 5.893634000  | 3.740789000  | -0.018583000 |
| H | 0.275665000  | 7.395221000  | -0.361820000 | H | 4.549393000  | 5.859671000  | -0.025758000 |
| H | -2.164205000 | 6.844117000  | -0.240016000 | H | 2.244734000  | 6.836806000  | -0.048599000 |
| H | -4.146259000 | 5.297023000  | -0.073144000 | H | -0.274985000 | 6.737294000  | -0.051489000 |
| H | -6.134757000 | 3.714479000  | -0.050897000 | H | -2.814430000 | 6.613421000  | 0.028574000  |
| H | -7.201630000 | 1.454729000  | -0.205133000 | H | -5.005527000 | 5.407147000  | 0.135561000  |
| H | -6.826012000 | -0.994012000 | -0.313442000 | H | -6.144158000 | 3.200403000  | 0.131938000  |
| H | -6.475821000 | -3.445092000 | -0.376914000 | H | -7.300455000 | 1.003233000  | 0.061581000  |
| H | -4.806186000 | -5.308305000 | -0.290927000 | H | -7.030173000 | -1.481289000 | -0.079642000 |
| H | -2.450269000 | -6.257635000 | -0.249156000 | H | -5.672605000 | -3.632076000 | -0.140989000 |
| H | -0.104174000 | -7.175522000 | -0.293171000 | H | -4.308228000 | -5.751596000 | -0.086089000 |
| H | 2.394567000  | -7.010065000 | -0.263959000 | H | -2.186438000 | -7.076843000 | 0.004772000  |
| H | 4.358226000  | -5.455055000 | -0.128044000 | H | 0.319780000  | -6.960805000 | 0.061434000  |
| H | 6.327215000  | -3.912673000 | -0.010706000 | H | 2.819709000  | -6.859643000 | 0.099272000  |
| H | 7.081263000  | -1.529941000 | 0.057678000  | H | 4.827512000  | -5.368983000 | 0.067886000  |
| H | 6.723159000  | 0.986467000  | 0.037191000  | H | 6.010798000  | -3.122508000 | 0.010349000  |
| H | 6.342451000  | 3.495565000  | -0.087223000 | H | 7.174901000  | -0.864867000 | 0.004428000  |
| B | 0.559137000  | 1.327474000  | 0.064004000  | B | 1.223123000  | 0.761196000  | -0.163189000 |
| N | -0.869281000 | 1.103335000  | 0.099644000  | N | -0.072122000 | 1.415348000  | -0.193227000 |
| C | -1.373101000 | -0.202995000 | 0.547785000  | C | -1.259118000 | 0.661806000  | -0.411613000 |
| N | -1.277024000 | -0.189587000 | 2.010425000  | N | -0.475041000 | 0.038447000  | 2.780522000  |

|   |              |              |             |   |              |              |             |
|---|--------------|--------------|-------------|---|--------------|--------------|-------------|
| H | -1.637839000 | -1.070410000 | 2.372279000 | H | -1.324589000 | -0.407765000 | 2.445373000 |
| H | -1.873809000 | 0.551087000  | 2.374322000 | H | -0.405587000 | 0.914468000  | 2.268714000 |
|   |              |              |             | H | -0.632197000 | 0.278298000  | 3.755974000 |
